# Supplementary material for: The Enzyme Lysine Malonylation of Calvin Cycle and Gluconeogenesis Regulated Glycometabolism in Nostoc flagelliforme to Adapt to Drought Stress
Source: Int J Mol Sci. 2023 May 8;24(9):8446. doi: 10.3390/ijms24098446 (PMC10179182; doi:10.3390/ijms24098446)
Supplement: Supplementary file 1 [file ijms-24-08446-s001.zip › Supplementary Table.xlsx]

## Sheet: Table S1
Table S1 : List of primers used in the study.
Note: The primers used for cloning of FBA, IDH and NDK are listed below
Primer name	Primer sequence
FBA-F	CGCGGATCCATGTATCCAACGGTCATAGAGG
FBA-R	CCGCTCGAGCTAAGTTATGGTCACATCTGGCG
IDH-F	TTAGGATCCATGAACGAAAAGATTACCCCTCCCGC
IDH-R	AATCTCGAGTGAACCATAGTGTTGAATAACCGCCTC
NDK-F	CGCGGATCCATGGAGCGGACATTCTTAGC
NDK-R	CCGCTCGAGTTACTCGTCCAACCAAGG

## Sheet: Table S2
Table S2 : List of all 421 identified Kmal sites identified in the present study.
Protein Accession	Positions within Proteins	Amino acid	Protein Name	Gene Name	Mol weight [kDa]	Fasta headers	Sequence length	Score	Score for localization	Mal (K) Probabilities	Mal (K) Score diffs	Position in peptide	Charge	Mass error [ppm]
A0A1L5SMA2	303	K	6-phosphogluconate dehydrogenase, decarboxylating		52.357	tr|A0A2K8SQH8|A0A2K8SQH8_9NOSO Alkaline phosphatase OS=Nostoc flagelliforme CCNUN1 OX=2038116 GN=COO91_03627 PE=4 SV=1	476	37.886	37.886	VAASK(0.998)VLTGPSGK(0.002)YDGQTK	VAASK(27)VLTGPSGK(-27)YDGQTK(-37)	5	3	2.8719
A0A1L5SMA2	38	K	6-phosphogluconate dehydrogenase, decarboxylating		52.357	tr|A0A2K8SX07|A0A2K8SX07_9NOSO Ribulose bisphosphate carboxylase large chain OS=Nostoc flagelliforme CCNUN1 OX=2038116 GN=cbbL PE=3 SV=1	476	51.864	51.864	EK(1)TDAFMAQR	EK(52)TDAFMAQR	2	2	-0.1214
A0A2K8SFV9	9	K	IlvC, ketol-acid reductoisomerase	COO91_00136	54.193	tr|A0A2K8SGU2|A0A2K8SGU2_9NOSO Glycerophosphoryl diester phosphodiesterase OS=Nostoc flagelliforme CCNUN1 OX=2038116 GN=COO91_00478 PE=4 SV=1	492	21.15	21.15	MSSLHFNTK(0.687)TFNK(0.313)	MSSLHFNTK(3.4)TFNK(-3.4)	9	2	-8.1085
A0A2K8SG09	195	K	S-methyl-5'-thioadenosine phosphorylase	mtnP	31.439	tr|A0A2K8SQK3|A0A2K8SQK3_9NOSO Carbonic anhydrase or acetyltransferase, isoleucine patch superfamily OS=Nostoc flagelliforme CCNUN1 OX=2038116 GN=COO91_03664 PE=4 SV=1	290	33.526	30.875	SWGATIIGMTNLPEAK(1)LAR	SWGATIIGMTNLPEAK(31)LAR	16	2	-0.53009
A0A2K8SG38	218	K	Glyceraldehyde-3-phosphate dehydrogenase	COO91_00217	37.064	tr|A0A2K8SR31|A0A2K8SR31_9NOSO Hemerythrin superfamily protein OS=Nostoc flagelliforme CCNUN1 OX=2038116 GN=COO91_03810 PE=4 SV=1	347	19.5	19.5	GASQNIIPSSTGAAK(0.98)AVALVLPELK(0.02)	GASQNIIPSSTGAAK(17)AVALVLPELK(-17)	15	3	0.8136
A0A2K8SGF7	63	K	Transposase	COO91_00353	9.7402	tr|A0A2K8SSS1|A0A2K8SSS1_9NOSO D-fructose 1,6-bisphosphatase class 2/sedoheptulose 1,7-bisphosphatase OS=Nostoc flagelliforme CCNUN1 OX=2038116 GN=COO91_04476 PE=3 SV=1	86	37.608	37.608	LSELTK(1)K(1)	LSELTK(38)K(38)	7	2	6.7336
A0A2K8SGF7	62	K	Transposase	COO91_00353	9.7402	tr|A0A2K8SZM7|A0A2K8SZM7_9NOSO Ca2+-binding protein, RTX toxin-related OS=Nostoc flagelliforme CCNUN1 OX=2038116 GN=COO91_06932 PE=3 SV=1	86	37.608	37.608	LSELTK(1)K(1)	LSELTK(38)K(38)	6	2	6.7336
A0A2K8SGI3	12	K	MgdE, monoglucosyldiacylglycerol epimerase	COO91_00371	46.613	tr|A0A2K8SIM9|A0A2K8SIM9_9NOSO Stress response protein YsnF OS=Nostoc flagelliforme CCNUN1 OX=2038116 GN=COO91_00524 PE=4 SV=1	412	32.549	14.455	MLAENLIGIETK(1)	MLAENLIGIETK(14)	12	3	1.5339
A0A2K8SGU2	83	K	Glycerophosphoryl diester phosphodiesterase	COO91_00478	110.08	tr|A0A2K8SS44|A0A2K8SS44_9NOSO PhoD, alkaline phosphatase D OS=Nostoc flagelliforme CCNUN1 OX=2038116 GN=COO91_04108 PE=4 SV=1	1028	30.862	30.862	INRLNPNFK(0.997)GTENGDGTVK(0.003)	INRLNPNFK(25)GTENGDGTVK(-25)	9	3	1.4521
A0A2K8SGU2	363	K	Glycerophosphoryl diester phosphodiesterase	COO91_00478	110.08	tr|A0A2K8SS57|A0A2K8SS57_9NOSO Phosphate-binding protein OS=Nostoc flagelliforme CCNUN1 OX=2038116 GN=COO91_04193 PE=3 SV=1	1028	108.34	57.62	NISDILIDTLK(1)ANNFTDPSR	NISDILIDTLK(58)ANNFTDPSR	11	2	1.1065
A0A2K8SGU2	584	K	Glycerophosphoryl diester phosphodiesterase	COO91_00478	110.08	tr|A5YN46|A5YN46_9NOSO Superoxide dismutase OS=Nostoc flagelliforme OX=1306274 GN=SOD PE=3 SV=1;tr|A0A2K8SGB2|A0A2K8SGB2_9NOSO Superoxide dismutase OS=Nostoc flagelliforme CCNUN1 OX=2038116 GN=COO91_00327 PE=3 SV=1	1028	80.82	80.82	SPQNPDVLSGDAFANLGGSK(0.999)GFEGGAINASK(0.001)	SPQNPDVLSGDAFANLGGSK(30)GFEGGAINASK(-30)	20	3	-1.229
A0A2K8SGU2	106	K	Glycerophosphoryl diester phosphodiesterase	COO91_00478	110.08	tr|D4NZI3|D4NZI3_9NOSO C-phycocyanin alpha subunit OS=Nostoc flagelliforme NX-09 OX=744871 PE=3 SV=1;tr|A0A2K8SJH2|A0A2K8SJH2_9NOSO CpcA, phycocyanin alpha chain OS=Nostoc flagelliforme CCNUN1 OX=2038116 GN=COO91_01514 PE=3 SV=1	1028	33.373	33.373	VLDYIQLSDPNNK(1)IPFQIVNEESSER	VLDYIQLSDPNNK(33)IPFQIVNEESSER	13	3	-0.53565
A0A2K8SGU2	905	K	Glycerophosphoryl diester phosphodiesterase	COO91_00478	110.08	tr|E7DPV6|E7DPV6_9NOSO Uncharacterized protein OS=Nostoc flagelliforme str. Sunitezuoqi OX=676037 GN=Nfla_4801 PE=4 SV=1;tr|A0A2K8TDC8|A0A2K8TDC8_9NOSO 17 kDa surface antigen OS=Nostoc flagelliforme CCNUN1 OX=2038116 GN=COO91_11274 PE=4 SV=1	1028	146.34	86.135	QLSFGGFGNDSLTSK(1)GSNNR	QLSFGGFGNDSLTSK(86)GSNNR	15	2	-1.4865
A0A2K8SGU2	332	K	Glycerophosphoryl diester phosphodiesterase	COO91_00478	110.08	tr|A0A2K8SQV6|A0A2K8SQV6_9NOSO Ribose-5-phosphate isomerase A OS=Nostoc flagelliforme CCNUN1 OX=2038116 GN=rpiA PE=3 SV=1	1028	29.971	29.971	IGIYPETK(0.998)HPTYFAEEATYVGTTEK(0.002)	IGIYPETK(28)HPTYFAEEATYVGTTEK(-28)	8	3	0.7796
A0A2K8SGU2	424	K	Glycerophosphoryl diester phosphodiesterase	COO91_00478	110.08	tr|A0A2K8SR02|A0A2K8SR02_9NOSO ApcA, allophycocyanin alpha subunit OS=Nostoc flagelliforme CCNUN1 OX=2038116 GN=COO91_03780 PE=3 SV=1	1028	102.57	58.313	IIESQPYDLK(1)VSGDSR	IIESQPYDLK(58)VSGDSR	10	2	-0.4755
A0A2K8SGX5	229	K	Stress response protein YsnF	COO91_00525	32.107	tr|A0A2K8SUY3|A0A2K8SUY3_9NOSO Uncharacterized protein OS=Nostoc flagelliforme CCNUN1 OX=2038116 GN=COO91_05263 PE=4 SV=1	280	58.916	58.916	K(1)EAFVREEVR	K(59)EAFVREEVR	1	3	0.49695
A0A2K8SGX5	186	K	Stress response protein YsnF	COO91_00525	32.107	tr|A0A2K8SGX5|A0A2K8SGX5_9NOSO Stress response protein YsnF OS=Nostoc flagelliforme CCNUN1 OX=2038116 GN=COO91_00525 PE=4 SV=1	280	50.09	50.09	HIETDTASVTVPIQK(1)ER	HIETDTASVTVPIQK(50)ER	15	3	0.32431
A0A2K8SGX5	209	K	Stress response protein YsnF	COO91_00525	32.107	tr|A0A2K8SIV5|A0A2K8SIV5_9NOSO ABC.CD.TX, HlyD family secretion protein OS=Nostoc flagelliforme CCNUN1 OX=2038116 GN=COO91_01286 PE=4 SV=1	280	72.327	43.518	VVDPNELK(1)FQEGEVAR	VVDPNELK(44)FQEGEVAR	8	2	-1.2363
A0A2K8SGX8	76	K	Nitrogen regulatory protein PII	COO91_00551	11.438	tr|A0A2K8SLQ3|A0A2K8SLQ3_9NOSO 60 kDa chaperonin OS=Nostoc flagelliforme CCNUN1 OX=2038116 GN=groL PE=3 SV=1	103	35.537	29.971	VVENIK(0.991)PLLNK(0.009)FGGTCYVSDVMEVR	VVENIK(20)PLLNK(-20)FGGTCYVSDVMEVR	6	3	1.1493
A0A2K8SGZ6	12	K	Valyl-tRNA synthetase	COO91_00547	16.031	tr|A0A2K8SLS5|A0A2K8SLS5_9NOSO 60 kDa chaperonin OS=Nostoc flagelliforme CCNUN1 OX=2038116 GN=groL PE=3 SV=1;tr|B2ZWU2|B2ZWU2_9NOSO 60 kDa chaperonin (Fragment) OS=Nostoc flagelliforme MAC OX=450201 GN=groEL PE=3 SV=1	145	38.942	38.942	PEQEFTETASK(0.999)ETTVAEINSQTGTITK(0.001)	PEQEFTETASK(33)ETTVAEINSQTGTITK(-33)	11	3	-0.55286
A0A2K8SHB5	91	K	Chemotaxis signal transduction protein	COO91_00651	17.894	tr|A0A2K8SM92|A0A2K8SM92_9NOSO 10 kDa chaperonin OS=Nostoc flagelliforme CCNUN1 OX=2038116 GN=groS PE=3 SV=1	157	14.763	13.995	MMAIVLENK(1)GK(1)	MMAIVLENK(14)GK(14)	11	2	7.5794
A0A2K8SHB5	89	K	Chemotaxis signal transduction protein	COO91_00651	17.894	tr|A0A2K8SN84|A0A2K8SN84_9NOSO Bifunctional DNA-binding transcriptional regulator of stationary OS=Nostoc flagelliforme CCNUN1 OX=2038116 GN=COO91_02873 PE=4 SV=1	157	14.763	13.995	MMAIVLENK(1)GK(1)	MMAIVLENK(14)GK(14)	9	2	7.5794
A0A2K8SHE4	120	K	Harbinger transposase-derived nuclease domain	COO91_00321	35.418	tr|A0A2K8SQU3|A0A2K8SQU3_9NOSO ApcB, allophycocyanin beta subunit OS=Nostoc flagelliforme CCNUN1 OX=2038116 GN=COO91_03781 PE=3 SV=1	305	26.456	26.456	K(1)NESDLMVVK(1)	K(26)NESDLMVVK(26)	1	2	1.7216
A0A2K8SHE4	129	K	Harbinger transposase-derived nuclease domain	COO91_00321	35.418	tr|A0A2K8SS87|A0A2K8SS87_9NOSO Uncharacterized protein OS=Nostoc flagelliforme CCNUN1 OX=2038116 GN=COO91_03621 PE=4 SV=1	305	26.456	26.456	K(1)NESDLMVVK(1)	K(26)NESDLMVVK(26)	10	2	1.7216
A0A2K8SHH5	11	K	Mobile element protein	COO91_00743	8.441	tr|A0A2K8SSP1|A0A2K8SSP1_9NOSO Uncharacterized protein OS=Nostoc flagelliforme CCNUN1 OX=2038116 GN=COO91_04411 PE=4 SV=1	71	36.211	36.211	VGLVK(0.001)AHEK(0.5)K(0.5)	VGLVK(-29)AHEK(0)K(0)	10	3	9.9718
A0A2K8SHH5	10	K	Mobile element protein	COO91_00743	8.441	tr|A0A2K8SST9|A0A2K8SST9_9NOSO Glutaredoxin OS=Nostoc flagelliforme CCNUN1 OX=2038116 GN=COO91_04486 PE=3 SV=1	71	36.211	36.211	VGLVK(0.001)AHEK(0.5)K(0.5)	VGLVK(-29)AHEK(0)K(0)	9	3	9.9718
A0A2K8SHL1	283	K	TRIM71, tripartite motif-containing protein 71	COO91_00778	41.558	tr|A0A2K8SWI8|A0A2K8SWI8_9NOSO Archaeal aspartate aminotransferase OS=Nostoc flagelliforme CCNUN1 OX=2038116 GN=COO91_05812 PE=3 SV=1	393	69.224	48.363	VQVFDK(1)NGNFLTSFGENAR	VQVFDK(48)NGNFLTSFGENAR	6	2	0.50377
A0A2K8SHN4	149	K	D-3-phosphoglycerate dehydrogenase	COO91_00624	55.87	tr|A0A2K8SWQ6|A0A2K8SWQ6_9NOSO Uncharacterized protein OS=Nostoc flagelliforme CCNUN1 OX=2038116 GN=COO91_05888 PE=4 SV=1	526	42.941	42.941	TLGVVGLGK(0.998)IGSHVAAVAK(0.002)	TLGVVGLGK(28)IGSHVAAVAK(-28)	9	2	-1.8381
A0A2K8SHV3	11	K	Uncharacterized protein	COO91_00255	9.3609	tr|A0A2K8SXG1|A0A2K8SXG1_9NOSO Chaperone protein DnaK OS=Nostoc flagelliforme CCNUN1 OX=2038116 GN=dnaK PE=2 SV=1	84	6.2047	6.2047	MEFK(0.804)ASLMQFK(0.804)DSLMQFK(0.391)	MEFK(4.9)ASLMQFK(4.9)DSLMQFK(-4.9)	11	3	-9.91
A0A2K8SHV3	4	K	Uncharacterized protein	COO91_00255	9.3609	tr|A0A2K8SY16|A0A2K8SY16_9NOSO Uncaracterized surface protein containing fasciclin OS=Nostoc flagelliforme CCNUN1 OX=2038116 GN=COO91_06350 PE=4 SV=1	84	6.2047	6.2047	MEFK(0.804)ASLMQFK(0.804)DSLMQFK(0.391)	MEFK(4.9)ASLMQFK(4.9)DSLMQFK(-4.9)	4	3	-9.91
A0A2K8SI26	11	K	MsmX, multiple sugar transport system ATP-binding protein	COO91_00765	40.397	tr|A0A2K8SY35|A0A2K8SY35_9NOSO Dps, starvation-inducible DNA-binding protein OS=Nostoc flagelliforme CCNUN1 OX=2038116 GN=COO91_06272 PE=3 SV=1;tr|E7CYW0|E7CYW0_9NOSO Ferritin Dps family protein OS=Nostoc flagelliforme NX-09 OX=744871 PE=3 SV=1	366	20.234	20.234	AK(1)LELTNLNK(1)	AK(20)LELTNLNK(20)	10	2	3.017
A0A2K8SI26	3	K	MsmX, multiple sugar transport system ATP-binding protein	COO91_00765	40.397	tr|A0A2K8T0M1|A0A2K8T0M1_9NOSO Putative membrane protein OS=Nostoc flagelliforme CCNUN1 OX=2038116 GN=COO91_07287 PE=4 SV=1	366	20.234	20.234	AK(1)LELTNLNK(1)	AK(20)LELTNLNK(20)	2	2	3.017
A0A2K8SIL4	715	K	Ca2+-binding protein, RTX toxin-related	COO91_00982	84.807	tr|A0A2K8T213|A0A2K8T213_9NOSO Uncharacterized protein OS=Nostoc flagelliforme CCNUN1 OX=2038116 GN=COO91_07761 PE=4 SV=1	844	143.22	124.06	LDSDDFLFYEK(1)EDAR	LDSDDFLFYEK(120)EDAR	11	2	0.67517
A0A2K8SIL4	686	K	Ca2+-binding protein, RTX toxin-related	COO91_00982	84.807	tr|A0A2K8T2F2|A0A2K8T2F2_9NOSO Ubiqui/menaqui biosynthesis C-methylase UbiE OS=Nostoc flagelliforme CCNUN1 OX=2038116 GN=COO91_07976 PE=4 SV=1	844	106.29	44.667	VFLDK(1)SGGELDELVGVVQASSLR	VFLDK(45)SGGELDELVGVVQASSLR	5	3	1.2001
A0A2K8SIL8	278	K	Flavin-dependent oxidoreductase	COO91_01190	47.593	tr|E7DPI5|E7DPI5_9NOSO RNA polymerase sigma factor OS=Nostoc flagelliforme str. Sunitezuoqi OX=676037 GN=Nfla_1604 PE=4 SV=1	433	21.361	21.361	ILPGALVIVGETVAEAHAK(1)	ILPGALVIVGETVAEAHAK(21)	19	2	9.1844
A0A2K8SIM9	197	K	Stress response protein YsnF	COO91_00524	34.277	tr|E7DPM3|E7DPM3_9NOSO Uncharacterized protein OS=Nostoc flagelliforme str. Sunitezuoqi OX=676037 GN=Nfla_2702 PE=4 SV=1;tr|E7DPI0|E7DPI0_9NOSO Uncharacterized protein OS=Nostoc flagelliforme str. Sunitezuoqi OX=676037 GN=Nfla_1501 PE=4 SV=1;tr|A0A2K8SGV5|	297	68.108	42.446	AGEVTIGK(1)HVETDTAR	AGEVTIGK(42)HVETDTAR	8	2	-0.59897
A0A2K8SIM9	5	K	Stress response protein YsnF	COO91_00524	34.277	tr|A0A1L5SMA2|A0A1L5SMA2_9NOSO 6-phosphogluconate dehydrogenase, decarboxylating OS=Nostoc commune var. flagelliforme NX-09 OX=1928915 PE=3 SV=1	297	16.675	16.675	VLYK(1)LQDFEPNYRDTFEGR	VLYK(17)LQDFEPNYRDTFEGR	4	3	2.2932
A0A2K8SIM9	267	K	Stress response protein YsnF	COO91_00524	34.277	tr|A0A2K8SGF7|A0A2K8SGF7_9NOSO Transposase OS=Nostoc flagelliforme CCNUN1 OX=2038116 GN=COO91_00353 PE=4 SV=1	297	151.66	151.66	K(1)VVDEDTVETQK	K(150)VVDEDTVETQK(-150)	1	2	-0.46265
A0A2K8SIM9	278	K	Stress response protein YsnF	COO91_00524	34.277	tr|A0A2K8SHB5|A0A2K8SHB5_9NOSO Chemotaxis signal transduction protein OS=Nostoc flagelliforme CCNUN1 OX=2038116 GN=COO91_00651 PE=4 SV=1	297	91.245	72.846	VVDEDTVETQK(1)TVR	VVDEDTVETQK(73)TVR	11	2	-1.3546
A0A2K8SIM9	189	K	Stress response protein YsnF	COO91_00524	34.277	tr|A0A2K8SHE4|A0A2K8SHE4_9NOSO Harbinger transposase-derived nuclease domain OS=Nostoc flagelliforme CCNUN1 OX=2038116 GN=COO91_00321 PE=4 SV=1;tr|A0A2K8T9J8|A0A2K8T9J8_9NOSO Transposase IS4 family protein OS=Nostoc flagelliforme CCNUN1 OX=2038116 GN=COO91	297	42.495	42.495	QK(1)AGEVTIGKHVETDTAR	QK(34)AGEVTIGK(-34)HVETDTAR	2	3	0.61146
A0A2K8SIV5	126	K	ABC.CD.TX, HlyD family secretion protein	COO91_01286	46.843	tr|A0A2K8SHH5|A0A2K8SHH5_9NOSO Mobile element protein OS=Nostoc flagelliforme CCNUN1 OX=2038116 GN=COO91_00743 PE=4 SV=1;tr|E7DQ35|E7DQ35_9NOSO Putative transposase OS=Nostoc flagelliforme str. Sunitezuoqi OX=676037 GN=Nfla_7002 PE=4 SV=1	429	18.507	18.507	MAEAK(1)LAQVK(1)AGAK(1)	MAEAK(19)LAQVK(19)AGAK(19)	5	2	8.866
A0A2K8SIV5	131	K	ABC.CD.TX, HlyD family secretion protein	COO91_01286	46.843	tr|A0A2K8SHV3|A0A2K8SHV3_9NOSO Uncharacterized protein OS=Nostoc flagelliforme CCNUN1 OX=2038116 GN=COO91_00255 PE=4 SV=1	429	18.507	18.507	MAEAK(1)LAQVK(1)AGAK(1)	MAEAK(19)LAQVK(19)AGAK(19)	10	2	8.866
A0A2K8SIV5	135	K	ABC.CD.TX, HlyD family secretion protein	COO91_01286	46.843	tr|A0A2K8SI26|A0A2K8SI26_9NOSO MsmX, multiple sugar transport system ATP-binding protein OS=Nostoc flagelliforme CCNUN1 OX=2038116 GN=COO91_00765 PE=4 SV=1	429	18.507	18.507	MAEAK(1)LAQVK(1)AGAK(1)	MAEAK(19)LAQVK(19)AGAK(19)	14	2	8.866
A0A2K8SJ00	49	K	SRNA-binding protein	COO91_01149	11.115	tr|A0A2K8SIL4|A0A2K8SIL4_9NOSO Ca2+-binding protein, RTX toxin-related OS=Nostoc flagelliforme CCNUN1 OX=2038116 GN=COO91_00982 PE=4 SV=1	106	55.354	55.354	K(1)AETSASEFADWAGAVSGK	K(53)AETSASEFADWAGAVSGK(-53)	1	2	0.84535
A0A2K8SJ12	5	K	Transposase	COO91_01346	35.83	tr|A0A2K8SJ12|A0A2K8SJ12_9NOSO Transposase OS=Nostoc flagelliforme CCNUN1 OX=2038116 GN=COO91_01346 PE=4 SV=1	313	17.47	17.47	MDYQK(0.98)K(0.191)DIEIK(0.83)	MDYQK(16)K(-6.8)DIEIK(6.8)	5	3	3.1507
A0A2K8SJ12	11	K	Transposase	COO91_01346	35.83	tr|A0A2K8SJ95|A0A2K8SJ95_9NOSO DNA helicase OS=Nostoc flagelliforme CCNUN1 OX=2038116 GN=COO91_00735 PE=4 SV=1	313	17.47	12.596	MDYQK(0.906)K(0.253)DIEIK(0.841)	MDYQK(9)K(-6.7)DIEIK(6.7)	11	3	2.7086
A0A2K8SJ75	187	K	DUF4397 domain-containing protein	COO91_01379	31.597	tr|A0A2K8SJA3|A0A2K8SJA3_9NOSO Uncharacterized protein OS=Nostoc flagelliforme CCNUN1 OX=2038116 GN=COO91_01442 PE=4 SV=1	292	119.43	76.255	ISK(1)SSSPNVDETR	ISK(76)SSSPNVDETR	3	2	-0.33297
A0A2K8SJ77	196	K	CobK-cbiJ, precorrin-6A/cobalt-precorrin-6A reductase	COO91_00713	26.419	tr|A0A2K8SJC1|A0A2K8SJC1_9NOSO SIG2, RNA polymerase ssential primary-like sigma factor OS=Nostoc flagelliforme CCNUN1 OX=2038116 GN=COO91_01464 PE=4 SV=1	247	63.212	57.003	IDTIVSK(1)NSGGDATK	IDTIVSK(36)NSGGDATK(-36)	7	2	-0.30604
A0A2K8SJ95	12	K	DNA helicase	COO91_00735	77.519	tr|A0A2K8SJU5|A0A2K8SJU5_9NOSO Ketosteroid isomerase-related protein OS=Nostoc flagelliforme CCNUN1 OX=2038116 GN=COO91_01619 PE=3 SV=1	691	10.787	10.787	AHLMMHAQVLK(1)HFHK(1)	AHLMMHAQVLK(11)HFHK(11)	11	2	7.4493
A0A2K8SJ95	16	K	DNA helicase	COO91_00735	77.519	tr|A0A2K8SK78|A0A2K8SK78_9NOSO Uncharacterized protein OS=Nostoc flagelliforme CCNUN1 OX=2038116 GN=COO91_01757 PE=4 SV=1	691	10.787	10.787	AHLMMHAQVLK(1)HFHK(1)	AHLMMHAQVLK(11)HFHK(11)	15	2	7.4493
A0A2K8SJA3	187	K	Uncharacterized protein	COO91_01442	27.676	tr|A0A2K8SK99|A0A2K8SK99_9NOSO Coenzyme A biosynthesis bifunctional protein CoaBC OS=Nostoc flagelliforme CCNUN1 OX=2038116 GN=coaBC PE=3 SV=1	253	75.5	75.5	CITTPCFSTDNLVLNK(0.794)PK(0.206)	CITTPCFSTDNLVLNK(5.9)PK(-5.9)	16	2	-0.11525
A0A2K8SJA3	189	K	Uncharacterized protein	COO91_01442	27.676	tr|A0A2K8SKF6|A0A2K8SKF6_9NOSO Uncharacterized protein OS=Nostoc flagelliforme CCNUN1 OX=2038116 GN=COO91_01790 PE=4 SV=1	253	39.166	39.166	CITTPCFSTDNLVLNK(0.5)PK(0.5)	CITTPCFSTDNLVLNK(0)PK(0)	18	2	-0.22917
A0A2K8SJC1	215	K	SIG2, RNA polymerase ssential primary-like sigma factor	COO91_01464	36.064	tr|A0A2K8SKT7|A0A2K8SKT7_9NOSO Non-ribosomal peptide synthetase component F OS=Nostoc flagelliforme CCNUN1 OX=2038116 GN=COO91_01950 PE=4 SV=1	316	56.091	56.091	TAISLNK(1)K(1)	TAISLNK(56)K(56)	7	2	-8.9951
A0A2K8SJC1	216	K	SIG2, RNA polymerase ssential primary-like sigma factor	COO91_01464	36.064	tr|A0A2K8SLB0|A0A2K8SLB0_9NOSO CpcB, phycocyanin beta chain OS=Nostoc flagelliforme CCNUN1 OX=2038116 GN=COO91_01515 PE=3 SV=1;tr|D4NZI2|D4NZI2_9NOSO C-phycocyanin beta subunit OS=Nostoc flagelliforme NX-09 OX=744871 PE=3 SV=1	316	56.091	56.091	TAISLNK(1)K(1)	TAISLNK(56)K(56)	8	2	-8.9951
A0A2K8SJL1	184	K	CpcC, phycocyanin-associated rod linker protein	COO91_01512	31.915	tr|A0A2K8SLC8|A0A2K8SLC8_9NOSO Alkylated DNA nucleotide flippase Atl1 OS=Nostoc flagelliforme CCNUN1 OX=2038116 GN=COO91_02177 PE=4 SV=1	289	62.705	62.705	GYASSDTSQLK(1)GNSPR	GYASSDTSQLK(63)GNSPR	11	2	-1.3993
A0A2K8SJN2	165	K	NagA, N-acetylglucosamine-6-phosphate deacetylase	COO91_01532	44.076	tr|A0A2K8SMW9|A0A2K8SMW9_9NOSO Nitrous oxidase accessory protein NosD, containings tandem CASH domains OS=Nostoc flagelliforme CCNUN1 OX=2038116 GN=COO91_02696 PE=4 SV=1	406	20.611	20.611	GAHPAEYLLPLTIDQIK(1)R	GAHPAEYLLPLTIDQIK(21)R	17	4	-7.0165
A0A2K8SJQ5	28	K	Uncharacterized protein	COO91_01606	22.658	tr|A0A2K8SNU4|A0A2K8SNU4_9NOSO TrxA, thioredoxin 1 OS=Nostoc flagelliforme CCNUN1 OX=2038116 GN=COO91_03019 PE=4 SV=1	203	30.988	30.988	MTIK(0.001)SLLPLIAATLVCGGSVFVEARQPK(0.999)	MTIK(-31)SLLPLIAATLVCGGSVFVEARQPK(31)	28	4	5.7874
A0A2K8SJU5	162	K	Ketosteroid isomerase-related protein	COO91_01619	19.515	tr|A0A2K8SNU7|A0A2K8SNU7_9NOSO Nitrous oxidase accessory protein NosD, containings tandem CASH domains OS=Nostoc flagelliforme CCNUN1 OX=2038116 GN=COO91_02430 PE=4 SV=1	176	56.943	38.656	TIAGEVGYTDVK(0.999)PIETQAETGK(0.001)TSSL	TIAGEVGYTDVK(32)PIETQAETGK(-32)TSSL	12	3	-1.2624
A0A2K8SJU5	172	K	Ketosteroid isomerase-related protein	COO91_01619	19.515	tr|A0A2K8SPC1|A0A2K8SPC1_9NOSO Prokaryotic membrane lipoprotein lipid attachment site profile OS=Nostoc flagelliforme CCNUN1 OX=2038116 GN=COO91_03195 PE=4 SV=1	176	85.562	85.562	TIAGEVGYTDVKPIETQAETGK(1)TSSL	TIAGEVGYTDVK(-43)PIETQAETGK(43)TSSL	22	3	1.5606
A0A2K8SJZ9	5	K	Glycogen debranching enzyme	COO91_01643	85.645	tr|A0A2K8SQ37|A0A2K8SQ37_9NOSO YlqD protein OS=Nostoc flagelliforme CCNUN1 OX=2038116 GN=COO91_02844 PE=4 SV=1	756	17.47	17.47	MTPEK(0.982)IFLDGK(0.018)	MTPEK(17)IFLDGK(-17)	5	3	2.8909
A0A2K8SK33	171	K	FMN_red domain-containing protein	COO91_01682	22.002	tr|A0A2K8SQ60|A0A2K8SQ60_9NOSO Uncharacterized protein OS=Nostoc flagelliforme CCNUN1 OX=2038116 GN=COO91_03425 PE=4 SV=1	206	17.992	17.992	VLVLPDQIAVSK(0.972)AYEAFNPDGTLVDPK(0.028)	VLVLPDQIAVSK(15)AYEAFNPDGTLVDPK(-15)	12	3	1.9904
A0A2K8SK51	570	K	Ca2+-binding protein, RTX toxin-related	COO91_01727	92.995	tr|A0A2K8SQR2|A0A2K8SQR2_9NOSO Putative transposase YbfD/YdcC associated with H repeats OS=Nostoc flagelliforme CCNUN1 OX=2038116 GN=COO91_03710 PE=4 SV=1	892	63.79	63.79	TGSITAGTNQVSYK(1)NIER	TGSITAGTNQVSYK(64)NIER	14	2	-2.0404
A0A2K8SK65	53	K	Photosystem I reaction center subunit II	COO91_01641	15.537	tr|A0A2K8SQW3|A0A2K8SQW3_9NOSO FAD/FMN-containing dehydrogenase OS=Nostoc flagelliforme CCNUN1 OX=2038116 GN=COO91_03143 PE=4 SV=1	141	72.492	54.436	K(1)GENLLYIAR	K(54)GENLLYIAR	1	2	-1.5487
A0A2K8SK76	31	K	Glutathione synthase/RimK-type ligase, ATP-grasp superfamily	COO91_01107	35.013	tr|A0A2K8SR47|A0A2K8SR47_9NOSO Putative secreted protein OS=Nostoc flagelliforme CCNUN1 OX=2038116 GN=COO91_03849 PE=4 SV=1	309	7.1882	7.1882	MIK(0.286)NYYLEMNILILGNSQDAHALAMQQALTK(0.714)	MIK(-7.1)NYYLEMNILILGNSQDAHALAMQQALTK(7.1)	31	4	3.2501
A0A2K8SK78	4	K	Uncharacterized protein	COO91_01757	21.102	tr|A0A2K8SR82|A0A2K8SR82_9NOSO Tetratricopeptide OS=Nostoc flagelliforme CCNUN1 OX=2038116 GN=COO91_03926 PE=4 SV=1	193	19.256	19.256	SYK(1)QFIHWWQK(1)	SYK(19)QFIHWWQK(19)	3	3	8.3748
A0A2K8SK78	12	K	Uncharacterized protein	COO91_01757	21.102	tr|A0A2K8SRA5|A0A2K8SRA5_9NOSO Acetylornithine aminotransferase OS=Nostoc flagelliforme CCNUN1 OX=2038116 GN=argD PE=3 SV=1	193	19.256	19.256	SYK(1)QFIHWWQK(1)	SYK(19)QFIHWWQK(19)	11	3	8.3748
A0A2K8SK99	347	K	Coenzyme A biosynthesis bifunctional protein CoaBC	coaBC	43.426	tr|A0A2K8SRM6|A0A2K8SRM6_9NOSO Recombinational DNA repair protein RecT OS=Nostoc flagelliforme CCNUN1 OX=2038116 GN=COO91_03410 PE=4 SV=1	401	30.812	30.812	LQSK(0.812)K(0.188)LDAIVANPIDQPDSGFGSDNNQAIFLDNQGR	LQSK(6.4)K(-6.4)LDAIVANPIDQPDSGFGSDNNQAIFLDNQGR	4	3	-0.2854
A0A2K8SK99	348	K	Coenzyme A biosynthesis bifunctional protein CoaBC	coaBC	43.426	tr|A0A2K8SRR1|A0A2K8SRR1_9NOSO Uncharacterized protein OS=Nostoc flagelliforme CCNUN1 OX=2038116 GN=COO91_04101 PE=4 SV=1	401	19.132	11.656	LQSK(0.5)K(0.5)LDAIVANPIDQPDSGFGSDNNQAIFLDNQGR	LQSK(0)K(0)LDAIVANPIDQPDSGFGSDNNQAIFLDNQGR	5	3	0.0071629
A0A2K8SKD7	179	K	Uncharacterized protein	COO91_01770	32.708	tr|A0A2K8SSC2|A0A2K8SSC2_9NOSO NAD(P)H-quinone oxidoreductase subunit J OS=Nostoc flagelliforme CCNUN1 OX=2038116 GN=ndhJ PE=3 SV=1	319	119.55	49.155	QGTQPTNAGK(1)FADGLAIDNLNPGR	QGTQPTNAGK(49)FADGLAIDNLNPGR	10	3	0.24297
A0A2K8SKF6	85	K	Uncharacterized protein	COO91_01790	18.606	tr|A0A2K8SSF3|A0A2K8SSF3_9NOSO Cytochrome c peroxidase OS=Nostoc flagelliforme CCNUN1 OX=2038116 GN=COO91_03684 PE=3 SV=1	168	52.837	52.837	NGITK(1)SITNAQTGKR	NGITK(53)SITNAQTGK(-53)R	5	3	-0.97643
A0A2K8SKF6	43	K	Uncharacterized protein	COO91_01790	18.606	tr|A0A2K8ST67|A0A2K8ST67_9NOSO Photosystem I P700 chlorophyll a apoprotein A1 OS=Nostoc flagelliforme CCNUN1 OX=2038116 GN=psaA PE=3 SV=1	168	95.138	95.138	AEITNSNLTQLK(1)INR	AEITNSNLTQLK(95)INR	12	2	-1.4032
A0A2K8SKI5	156	K	Surfactin synthase thioesterase subunit	COO91_01821	29.117	tr|A0A2K8ST74|A0A2K8ST74_9NOSO Chromosome segregation ATPase OS=Nostoc flagelliforme CCNUN1 OX=2038116 GN=COO91_04631 PE=4 SV=1	256	20.614	20.614	SLNGTPK(1)AVLESQELMQMFLPILR	SLNGTPK(21)AVLESQELMQMFLPILR	7	3	0.88157
A0A2K8SKI7	381	K	Acyl-homoserine lactone	COO91_01694	48.585	tr|A0A2K8ST95|A0A2K8ST95_9NOSO Elongation factor Tu OS=Nostoc flagelliforme CCNUN1 OX=2038116 GN=tuf PE=3 SV=1	455	58.889	58.889	SGGNVTVNYK(1)NLR	SGGNVTVNYK(59)NLR	10	2	-1.0488
A0A2K8SKK7	221	K	Uncharacterized protein	COO91_01773	33.793	tr|A0A2K8ST99|A0A2K8ST99_9NOSO CcmK, carbon dioxide concentrating mechanism protein CcmK OS=Nostoc flagelliforme CCNUN1 OX=2038116 GN=COO91_04648 PE=4 SV=1	330	35.182	35.182	NNLYK(1)VDLLTGELSAPITLR	NNLYK(35)VDLLTGELSAPITLR	5	2	-1.245
A0A2K8SKR6	72	K	Type II secretory pathway, pseudopilin PulG	COO91_01776	23.707	tr|A0A2K8STA7|A0A2K8STA7_9NOSO Uncharacterized protein OS=Nostoc flagelliforme CCNUN1 OX=2038116 GN=COO91_04550 PE=4 SV=1	220	38.839	38.839	EK(0.999)PAAAAATGEKPAAAAK	EK(35)PAAAAATGEK(-35)PAAAAK(-36)	2	3	-0.8786
A0A2K8SKT7	8078	K	Non-ribosomal peptide synthetase component F	COO91_01950	914.07	tr|A0A2K8STF2|A0A2K8STF2_9NOSO Photosystem I P700 chlorophyll a apoprotein A2 OS=Nostoc flagelliforme CCNUN1 OX=2038116 GN=psaB PE=3 SV=1	8174	8.3744	8.3744	MVDILPPDADITYLK(1)K(1)	MVDILPPDADITYLK(8.4)K(8.4)	15	3	-4.8126
A0A2K8SKT7	8079	K	Non-ribosomal peptide synthetase component F	COO91_01950	914.07	tr|A0A2K8SUN2|A0A2K8SUN2_9NOSO Uncharacterized protein OS=Nostoc flagelliforme CCNUN1 OX=2038116 GN=COO91_05168 PE=4 SV=1	8174	8.3744	8.3744	MVDILPPDADITYLK(1)K(1)	MVDILPPDADITYLK(8.4)K(8.4)	16	3	-4.8126
A0A2K8SLB0	33	K	CpcB, phycocyanin beta chain	COO91_01515	18.074	tr|A0A2K8SUN8|A0A2K8SUN8_9NOSO Prokaryotic membrane lipoprotein lipid attachment site profile OS=Nostoc flagelliforme CCNUN1 OX=2038116 GN=COO91_05153 PE=4 SV=1	173	63.947	63.79	GEYLSAAQLDALSALVK(0.893)DGNK(0.107)R	GEYLSAAQLDALSALVK(9.2)DGNK(-9.2)R	17	3	-0.88772
A0A2K8SLB0	136	K	CpcB, phycocyanin beta chain	COO91_01515	18.074	tr|A0A2K8SUP8|A0A2K8SUP8_9NOSO Uncharacterized protein OS=Nostoc flagelliforme CCNUN1 OX=2038116 GN=COO91_05163 PE=4 SV=1	173	40.372	40.372	MK(1)DAALALVNDPNGITR	MK(40)DAALALVNDPNGITR	2	2	-1.4208
A0A2K8SLC8	5	K	Alkylated DNA nucleotide flippase Atl1	COO91_02177	27.13	tr|A0A2K8SUZ5|A0A2K8SUZ5_9NOSO ModA, molybdate transport system substrate-binding protein OS=Nostoc flagelliforme CCNUN1 OX=2038116 GN=COO91_05220 PE=3 SV=1	241	25.254	25.254	MVELK(1)TLNLK(1)	MVELK(25)TLNLK(25)	5	2	6.152
A0A2K8SLC8	10	K	Alkylated DNA nucleotide flippase Atl1	COO91_02177	27.13	tr|A0A2K8SVM1|A0A2K8SVM1_9NOSO NifZ, nitrogen fixation protein NifZ OS=Nostoc flagelliforme CCNUN1 OX=2038116 GN=COO91_05478 PE=3 SV=1	241	25.254	25.254	MVELK(1)TLNLK(1)	MVELK(25)TLNLK(25)	10	2	6.152
A0A2K8SLI3	3	K	PsaJ, photosystem I subunit IX	COO91_02171	5.6145	tr|A0A2K8SVS4|A0A2K8SVS4_9NOSO Cyanophycinase OS=Nostoc flagelliforme CCNUN1 OX=2038116 GN=COO91_05427 PE=3 SV=1	49	25.613	25.613	MQK(0.971)PNDQK(0.025)DNFLK(0.003)	MQK(16)PNDQK(-16)DNFLK(-24)	3	2	-1.045
A0A2K8SLN7	315	K	GSR, glutathione reductase	COO91_02263	48.846	tr|A0A2K8SW68|A0A2K8SW68_9NOSO BCP, peroxiredoxin Q/BCP OS=Nostoc flagelliforme CCNUN1 OX=2038116 GN=COO91_05709 PE=4 SV=1	448	43.904	43.904	VQLTPVAK(0.999)AEGIAFADTVFGNK(0.001)	VQLTPVAK(30)AEGIAFADTVFGNK(-30)	8	2	0.44818
A0A2K8SLQ3	429	K	60 kDa chaperonin	groL	59.168	tr|A0A2K8SWI0|A0A2K8SWI0_9NOSO Uncharacterized protein OS=Nostoc flagelliforme CCNUN1 OX=2038116 GN=COO91_05809 PE=4 SV=1	563	52.591	19.006	K(1)TLQNDEERIGADIVER	K(19)TLQNDEERIGADIVER	1	3	-0.175
A0A2K8SLQ3	237	K	60 kDa chaperonin	groL	59.168	tr|A0A2K8SWP7|A0A2K8SWP7_9NOSO Glycine/D-amino acid oxidase OS=Nostoc flagelliforme CCNUN1 OX=2038116 GN=COO91_05861 PE=4 SV=1	563	50.116	50.116	ISSIQDLVPILEK(1)VAR	ISSIQDLVPILEK(50)VAR	13	2	0.79291
A0A2K8SLQ3	362	K	60 kDa chaperonin	groL	59.168	tr|A0A2K8SXI3|A0A2K8SXI3_9NOSO Glyceraldehyde-3-phosphate dehydrogenase OS=Nostoc flagelliforme CCNUN1 OX=2038116 GN=COO91_05459 PE=3 SV=1	563	93.649	41.499	RQLEETDSEYDQEK(1)LQER	RQLEETDSEYDQEK(41)LQER	14	3	0.81505
A0A2K8SLS5	79	K	60 kDa chaperonin	groL	57.811	tr|A0A2K8SYI6|A0A2K8SYI6_9NOSO ParM, plasmid segregation protein ParM OS=Nostoc flagelliforme CCNUN1 OX=2038116 GN=COO91_06526 PE=4 SV=1	544	30.668	30.668	QAASK(0.999)TNDAAGDGTTTATVLAHAIVK(0.001)	QAASK(31)TNDAAGDGTTTATVLAHAIVK(-31)	5	3	-0.62829
A0A2K8SLS5	341	K	60 kDa chaperonin	groL	57.811	tr|A0A2K8SYJ0|A0A2K8SYJ0_9NOSO ATP synthase subunit beta OS=Nostoc flagelliforme CCNUN1 OX=2038116 GN=atpD PE=3 SV=1	544	87.573	87.573	DSTTIVAEGNEAAVK(1)AR	DSTTIVAEGNEAAVK(88)AR	15	2	-0.89187
A0A2K8SLS5	276	K	60 kDa chaperonin	groL	57.811	tr|A0A2K8SYM7|A0A2K8SYM7_9NOSO Uncharacterized protein OS=Nostoc flagelliforme CCNUN1 OX=2038116 GN=COO91_06468 PE=4 SV=1	544	27.378	27.378	GVLNVAAVK(1)APGFGDRR	GVLNVAAVK(27)APGFGDRR	9	3	-0.41276
A0A2K8SLV2	53	K	Phosphate import ATP-binding protein PstB	pstB	30.405	tr|A0A2K8SYZ8|A0A2K8SYZ8_9NOSO Transketolase OS=Nostoc flagelliforme CCNUN1 OX=2038116 GN=COO91_06695 PE=3 SV=1	268	45.654	35.246	NQVTAFIGPSGCGK(1)STLLR	NQVTAFIGPSGCGK(35)STLLR	14	2	-1.5262
A0A2K8SM45	237	K	Isocitrate dehydrogenase [NADP]	COO91_02459	52.214	tr|A0A2K8SZ44|A0A2K8SZ44_9NOSO L-asparaginase OS=Nostoc flagelliforme CCNUN1 OX=2038116 GN=COO91_06642 PE=4 SV=1	473	102.55	102.55	QQVTLVHK(0.999)GNIMK(0.001)	QQVTLVHK(28)GNIMK(-28)	8	2	-1.1477
A0A2K8SM92	55	K	10 kDa chaperonin	groS	11.049	tr|A0A2K8SZD5|A0A2K8SZD5_9NOSO Photosystem I iron-sulfur center OS=Nostoc flagelliforme CCNUN1 OX=2038116 GN=psaC PE=3 SV=1	103	84.999	84.999	EKPQVGEVVALGPGK(1)R	EK(-85)PQVGEVVALGPGK(85)R	15	3	0.28858
A0A2K8SM92	42	K	10 kDa chaperonin	groS	11.049	tr|A0A2K8SZF4|A0A2K8SZF4_9NOSO Carboxypeptidase C OS=Nostoc flagelliforme CCNUN1 OX=2038116 GN=COO91_06766 PE=4 SV=1	103	47.57	47.57	EK(1)PQVGEVVALGPGKR	EK(46)PQVGEVVALGPGK(-46)R	2	3	-0.22989
A0A2K8SM92	28	K	10 kDa chaperonin	groS	11.049	tr|A0A2K8SZP2|A0A2K8SZP2_9NOSO P-loop containing nucleoside triphosphate hydrolase OS=Nostoc flagelliforme CCNUN1 OX=2038116 GN=COO91_06947 PE=4 SV=1	103	61.503	61.503	VNASEEK(1)TAGGLYLPDTAK	VNASEEK(59)TAGGLYLPDTAK(-59)	7	2	0.15789
A0A2K8SMI2	233	K	ABC-2.OM, polysaccharide export outer membrane protein	COO91_02428	51.49	tr|A0A2K8SZR7|A0A2K8SZR7_9NOSO Nucleotide-binding universal stress protein, UspA family OS=Nostoc flagelliforme CCNUN1 OX=2038116 GN=COO91_06984 PE=3 SV=1	490	16.759	16.131	DGDTIVVPTATNFDVAK(1)SR	DGDTIVVPTATNFDVAK(16)SR	17	2	-0.16008
A0A2K8SMJ1	12	K	Uncharacterized protein	COO91_02549	17.964	tr|A0A2K8T034|A0A2K8T034_9NOSO Phosphoglycerate kinase OS=Nostoc flagelliforme CCNUN1 OX=2038116 GN=pgk PE=3 SV=1	156	12.596	12.596	SQLYTTPEVAK(1)	SQLYTTPEVAK(13)	11	2	-2.4148
A0A2K8SMN1	62	K	Uncharacterized protein	COO91_02657	17.17	tr|A0A2K8T090|A0A2K8T090_9NOSO Histidine kinase-like ATPase OS=Nostoc flagelliforme CCNUN1 OX=2038116 GN=COO91_07132 PE=4 SV=1	154	64.906	64.906	K(1)QTLNFAGDEIR	K(65)QTLNFAGDEIR	1	2	-0.23882
A0A2K8SMQ3	43	K	Uncharacterized protein	COO91_02609	29.793	tr|A0A2K8T0B5|A0A2K8T0B5_9NOSO Murein DD-endopeptidase MepM and murein hydrolase activator NlpD, containing LysM domain OS=Nostoc flagelliforme CCNUN1 OX=2038116 GN=COO91_07166 PE=4 SV=1	266	47.915	47.915	SAVSQVGSEFK(1)QGSSELR	SAVSQVGSEFK(48)QGSSELR	11	2	-2.0249
A0A2K8SMW9	291	K	Nitrous oxidase accessory protein NosD, containings tandem CASH domains	COO91_02696	59.361	tr|A0A2K8T0N4|A0A2K8T0N4_9NOSO PfpI, protease I OS=Nostoc flagelliforme CCNUN1 OX=2038116 GN=COO91_07286 PE=3 SV=1	564	67.903	67.903	K(1)NVIQNNKR	K(67)NVIQNNK(-67)R	1	3	-1.1244
A0A2K8SMW9	525	K	Nitrous oxidase accessory protein NosD, containings tandem CASH domains	COO91_02696	59.361	tr|A0A2K8T0U7|A0A2K8T0U7_9NOSO Putative dehydrogenase OS=Nostoc flagelliforme CCNUN1 OX=2038116 GN=COO91_07308 PE=4 SV=1	564	82.437	61.577	QLVINYPTAK(1)QLNPNR	QLVINYPTAK(62)QLNPNR	10	2	-0.44537
A0A2K8SN83	115	K	Dihydrolipoamide acetyltransferase component of pyruvate dehydrogenase complex	COO91_02841	42.115	tr|A0A2K8T313|A0A2K8T313_9NOSO Taurine dioxygenase, alpha-ketoglutarate-dependent OS=Nostoc flagelliforme CCNUN1 OX=2038116 GN=COO91_08189 PE=4 SV=1	403	24.922	24.922	ELK(1)VDLTTLQGSGPHGR	ELK(25)VDLTTLQGSGPHGR	3	2	-0.53453
A0A2K8SN84	31	K	Bifunctional DNA-binding transcriptional regulator of stationary	COO91_02873	16.139	tr|A0A2K8T707|A0A2K8T707_9NOSO Uncharacterized protein OS=Nostoc flagelliforme CCNUN1 OX=2038116 GN=COO91_09607 PE=4 SV=1	145	47.561	47.561	AK(1)QCGYYTVTK	AK(48)QCGYYTVTK(-48)	2	2	0.61928
A0A2K8SN84	12	K	Bifunctional DNA-binding transcriptional regulator of stationary	COO91_02873	16.139	tr|A0A2K8T7S0|A0A2K8T7S0_9NOSO Arc-type ribbon-helix-helix OS=Nostoc flagelliforme CCNUN1 OX=2038116 GN=COO91_09927 PE=4 SV=1	145	65.879	65.879	TETATAPLTGK(0.981)ALLAK(0.019)	TETATAPLTGK(17)ALLAK(-17)	11	2	0.64902
A0A2K8SN84	19	K	Bifunctional DNA-binding transcriptional regulator of stationary	COO91_02873	16.139	tr|A0A2K8T8N2|A0A2K8T8N2_9NOSO Non-ribosomal peptide synthetase component F OS=Nostoc flagelliforme CCNUN1 OX=2038116 GN=COO91_10224 PE=4 SV=1	145	58.426	58.426	VK(1)ELSTLPR	VK(58)ELSTLPR	2	2	0.0060838
A0A2K8SNB3	8	K	Putative transposase YdaD	COO91_02840	34.666	tr|A0A2K8TA49|A0A2K8TA49_9NOSO Methyl-accepting chemotaxis protein OS=Nostoc flagelliforme CCNUN1 OX=2038116 GN=COO91_09804 PE=4 SV=1;tr|A0A2K8T706|A0A2K8T706_9NOSO Uncharacterized protein OS=Nostoc flagelliforme CCNUN1 OX=2038116 GN=COO91_09642 PE=4 SV=1	300	24.819	24.819	TYDNTLK(1)	TYDNTLK(25)	7	1	-9.359
A0A2K8SNB8	157	K	DNA-binding ferritin-like protein	COO91_02738	20.752	tr|A0A2K8TB18|A0A2K8TB18_9NOSO Uncharacterized protein OS=Nostoc flagelliforme CCNUN1 OX=2038116 GN=COO91_11129 PE=4 SV=1;tr|A0A2K8T819|A0A2K8T819_9NOSO Uncharacterized protein OS=Nostoc flagelliforme CCNUN1 OX=2038116 GN=COO91_09408 PE=4 SV=1	184	85.813	85.813	ILLK(1)TEER	ILLK(86)TEER	4	2	0.80727
A0A2K8SNI2	6	K	5-methylcytosine-specific restriction endonuclease McrA	COO91_02976	12.556	tr|E7DPV7|E7DPV7_9NOSO Uncharacterized protein OS=Nostoc flagelliforme str. Sunitezuoqi OX=676037 GN=Nfla_4802 PE=4 SV=1;tr|A0A2K8TBQ8|A0A2K8TBQ8_9NOSO Anion permease ArsB/NhaD-like OS=Nostoc flagelliforme CCNUN1 OX=2038116 GN=COO91_11272 PE=4 SV=1	109	42.075	42.075	RVPYK(1)EIPLTR	RVPYK(42)EIPLTR	5	2	-3.9045
A0A2K8SNN8	14	K	SixA, phosphohistidine phosphatase	COO91_02981	18.457	tr|A0A2K8SFV9|A0A2K8SFV9_9NOSO IlvC, ketol-acid reductoisomerase OS=Nostoc flagelliforme CCNUN1 OX=2038116 GN=COO91_00136 PE=3 SV=1	164	37.504	35.45	HGIAEDK(0.997)GLGIK(0.003)DEER	HGIAEDK(25)GLGIK(-25)DEER	7	3	-0.25015
A0A2K8SNU4	18	K	TrxA, thioredoxin 1	COO91_03019	7.754	tr|A0A2K8SG09|A0A2K8SG09_9NOSO S-methyl-5'-thioadenosine phosphorylase OS=Nostoc flagelliforme CCNUN1 OX=2038116 GN=mtnP PE=3 SV=1	71	38.584	38.584	MVAPVVDEISEQYK(0.247)GQIK(0.753)	MVAPVVDEISEQYK(-4.8)GQIK(4.8)	18	2	-1.0649
A0A2K8SNU4	21	K	TrxA, thioredoxin 1	COO91_03019	7.754	tr|A0A2K8SG38|A0A2K8SG38_9NOSO Glyceraldehyde-3-phosphate dehydrogenase OS=Nostoc flagelliforme CCNUN1 OX=2038116 GN=COO91_00217 PE=3 SV=1	71	66.485	37.886	VVK(1)VNTDENPQVASQYGIR	VVK(38)VNTDENPQVASQYGIR	3	2	-0.17003
A0A2K8SNU7	59	K	Nitrous oxidase accessory protein NosD, containings tandem CASH domains	COO91_02430	50.353	tr|A0A2K8SGI3|A0A2K8SGI3_9NOSO MgdE, monoglucosyldiacylglycerol epimerase OS=Nostoc flagelliforme CCNUN1 OX=2038116 GN=COO91_00371 PE=4 SV=1	457	41.499	26.21	YYVSGK(1)GNDRNSGLTTSSAFR	YYVSGK(26)GNDRNSGLTTSSAFR	6	3	1.5272
A0A2K8SNU7	297	K	Nitrous oxidase accessory protein NosD, containings tandem CASH domains	COO91_02430	50.353	tr|A0A2K8SGX8|A0A2K8SGX8_9NOSO Nitrogen regulatory protein PII OS=Nostoc flagelliforme CCNUN1 OX=2038116 GN=COO91_00551 PE=4 SV=1	457	66.087	66.087	GSK(1)LSAYR	GSK(66)LSAYR	3	2	1.5998
A0A2K8SNV4	316	K	Glucose/arabinose dehydrogenase, beta-propeller fold	COO91_02972	53.326	tr|A0A2K8SGZ6|A0A2K8SGZ6_9NOSO Valyl-tRNA synthetase OS=Nostoc flagelliforme CCNUN1 OX=2038116 GN=COO91_00547 PE=4 SV=1	475	75.243	75.243	K(1)GANYGWGNR	K(75)GANYGWGNR	1	2	2.4772
A0A2K8SP02	333	K	Fructose-1,6-bisphosphate aldolase	COO91_03022	38.736	tr|A0A2K8SHL1|A0A2K8SHL1_9NOSO TRIM71, tripartite motif-containing protein 71 OS=Nostoc flagelliforme CCNUN1 OX=2038116 GN=COO91_00778 PE=4 SV=1	359	32.549	32.549	IK(0.999)QISLEDFAAK(0.001)	IK(33)QISLEDFAAK(-33)	2	2	0.80022
A0A2K8SP12	150	K	Mn-containing catalase	COO91_03117	25.772	tr|A0A2K8SHN4|A0A2K8SHN4_9NOSO D-3-phosphoglycerate dehydrogenase OS=Nostoc flagelliforme CCNUN1 OX=2038116 GN=COO91_00624 PE=3 SV=1	230	51.829	20.29	LATDK(1)GTQETLVHLLTR	LATDK(20)GTQETLVHLLTR	5	3	1.2301
A0A2K8SPA4	8	K	Protoheme ferro-lyase	COO91_02586	6.8558	tr|A0A2K8SIL8|A0A2K8SIL8_9NOSO Flavin-dependent oxidoreductase OS=Nostoc flagelliforme CCNUN1 OX=2038116 GN=COO91_01190 PE=3 SV=1	61	72.031	46.768	TNATTTK(1)VTTPVIEDR	TNATTTK(47)VTTPVIEDR	7	2	-2.2738
A0A2K8SPC1	87	K	Prokaryotic membrane lipoprotein lipid attachment site profile	COO91_03195	23.666	tr|A0A2K8SJ00|A0A2K8SJ00_9NOSO SRNA-binding protein OS=Nostoc flagelliforme CCNUN1 OX=2038116 GN=COO91_01149 PE=4 SV=1	231	48.037	48.037	DLAACVVK(0.829)IDK(0.171)ETQIAATDALSSCGR	DLAACVVK(6.9)IDK(-6.9)ETQIAATDALSSCGR	8	3	2.2682
A0A2K8SPC1	90	K	Prokaryotic membrane lipoprotein lipid attachment site profile	COO91_03195	23.666	tr|A0A2K8SJ75|A0A2K8SJ75_9NOSO DUF4397 domain-containing protein OS=Nostoc flagelliforme CCNUN1 OX=2038116 GN=COO91_01379 PE=4 SV=1;tr|A0A2K8T416|A0A2K8T416_9NOSO DUF4397 domain-containing protein OS=Nostoc flagelliforme CCNUN1 OX=2038116 GN=COO91_08582 PE	231	31.674	31.674	DLAACVVK(0.115)IDK(0.885)ETQIAATDALSSCGR	DLAACVVK(-8.9)IDK(8.9)ETQIAATDALSSCGR	11	3	3.2815
A0A2K8SQ07	260	K	Adenylosuccinate lyase	COO91_03491	48.464	tr|A0A2K8SJ77|A0A2K8SJ77_9NOSO CobK-cbiJ, precorrin-6A/cobalt-precorrin-6A reductase OS=Nostoc flagelliforme CCNUN1 OX=2038116 GN=COO91_00713 PE=4 SV=1	431	86.205	86.205	GQK(1)GSSAMPHKR	GQK(86)GSSAMPHK(-86)R	3	3	-0.42749
A0A2K8SQ31	277	K	DUF4394 domain-containing protein	COO91_03486	30.509	tr|A0A2K8SJL1|A0A2K8SJL1_9NOSO CpcC, phycocyanin-associated rod linker protein OS=Nostoc flagelliforme CCNUN1 OX=2038116 GN=COO91_01512 PE=3 SV=1	288	36.181	34.338	IADVPK(0.998)GNFIGLAVTSK(0.002)	IADVPK(28)GNFIGLAVTSK(-28)	6	2	-0.22546
A0A2K8SQ37	5	K	YlqD protein	COO91_02844	17.287	tr|A0A2K8SJN2|A0A2K8SJN2_9NOSO NagA, N-acetylglucosamine-6-phosphate deacetylase OS=Nostoc flagelliforme CCNUN1 OX=2038116 GN=COO91_01532 PE=3 SV=1	149	8.9771	8.9771	MDVSK(0.852)SNLLLK(0.148)R	MDVSK(7.6)SNLLLK(-7.6)R	5	2	-0.18199
A0A2K8SQ37	59	K	YlqD protein	COO91_02844	17.287	tr|A0A2K8SJQ5|A0A2K8SJQ5_9NOSO Uncharacterized protein OS=Nostoc flagelliforme CCNUN1 OX=2038116 GN=COO91_01606 PE=4 SV=1	149	65.467	65.467	AIAAIQK(1)QSLQPPGPQTLQQIDNIQLQVNQK	AIAAIQK(65)QSLQPPGPQTLQQIDNIQLQVNQK(-65)	7	3	0.87842
A0A2K8SQ60	17	K	Uncharacterized protein	COO91_03425	4.197	tr|A0A2K8SJZ9|A0A2K8SJZ9_9NOSO Glycogen debranching enzyme OS=Nostoc flagelliforme CCNUN1 OX=2038116 GN=COO91_01643 PE=4 SV=1	37	13.218	13.218	MRK(1)TVQTMNGAVFVAGK(1)	MRK(13)TVQTMNGAVFVAGK(13)	17	3	-7.3266
A0A2K8SQ60	3	K	Uncharacterized protein	COO91_03425	4.197	tr|A0A2K8SK33|A0A2K8SK33_9NOSO FMN_red domain-containing protein OS=Nostoc flagelliforme CCNUN1 OX=2038116 GN=COO91_01682 PE=4 SV=1	37	13.218	13.218	MRK(1)TVQTMNGAVFVAGK(1)	MRK(13)TVQTMNGAVFVAGK(13)	3	3	-7.3266
A0A2K8SQ70	82	K	Metal-dependent hydrolase, endonuclease/exonuclease/phosphatase family	COO91_03527	38.321	tr|A0A2K8SK51|A0A2K8SK51_9NOSO Ca2+-binding protein, RTX toxin-related OS=Nostoc flagelliforme CCNUN1 OX=2038116 GN=COO91_01727 PE=4 SV=1	353	80.815	80.815	NK(1)TTGENSIALIDGTK	NK(81)TTGENSIALIDGTK(-81)	2	2	-2.6462
A0A2K8SQH8	571	K	Alkaline phosphatase	COO91_03627	70.162	tr|A0A2K8SK65|A0A2K8SK65_9NOSO Photosystem I reaction center subunit II OS=Nostoc flagelliforme CCNUN1 OX=2038116 GN=COO91_01641 PE=3 SV=1	653	18.927	18.927	DITFVK(0.985)HNPTDAGHFWGSDPNYK(0.015)	DITFVK(18)HNPTDAGHFWGSDPNYK(-18)	6	4	0.95881
A0A2K8SQH8	64	K	Alkaline phosphatase	COO91_03627	70.162	tr|A0A2K8SK76|A0A2K8SK76_9NOSO Glutathione synthase/RimK-type ligase, ATP-grasp superfamily OS=Nostoc flagelliforme CCNUN1 OX=2038116 GN=COO91_01107 PE=4 SV=1	653	78.864	78.864	AAAVAK(1)GAPFYTSGK	AAAVAK(66)GAPFYTSGK(-66)	6	2	-1.9378
A0A2K8SQH8	73	K	Alkaline phosphatase	COO91_03627	70.162	tr|A0A2K8SKD7|A0A2K8SKD7_9NOSO Uncharacterized protein OS=Nostoc flagelliforme CCNUN1 OX=2038116 GN=COO91_01770 PE=4 SV=1	653	43.613	43.613	GAPFYTSGK(0.964)GSGLSFQK(0.036)	GAPFYTSGK(14)GSGLSFQK(-14)	9	2	-1.7992
A0A2K8SQH8	9	K	Alkaline phosphatase	COO91_03627	70.162	tr|A0A2K8SKI5|A0A2K8SKI5_9NOSO Surfactin synthase thioesterase subunit OS=Nostoc flagelliforme CCNUN1 OX=2038116 GN=COO91_01821 PE=3 SV=1	653	18.403	18.403	MISFLQK(1)YK(1)	MISFLQK(18)YK(18)	9	2	7.5521
A0A2K8SQH8	647	K	Alkaline phosphatase	COO91_03627	70.162	tr|A0A2K8SKI7|A0A2K8SKI7_9NOSO Acyl-homoserine lactone OS=Nostoc flagelliforme CCNUN1 OX=2038116 GN=COO91_01694 PE=4 SV=1	653	33.456	33.456	GVVDQSHIFQAMK(1)TAIASP	GVVDQSHIFQAMK(33)TAIASP	13	2	0.13653
A0A2K8SQH8	614	K	Alkaline phosphatase	COO91_03627	70.162	tr|A0A2K8SKK7|A0A2K8SKK7_9NOSO Uncharacterized protein OS=Nostoc flagelliforme CCNUN1 OX=2038116 GN=COO91_01773 PE=4 SV=1	653	48.892	26.21	K(1)LGQGFQITDSSGTYTVPGVR	K(26)LGQGFQITDSSGTYTVPGVR	1	2	-0.14068
A0A2K8SQH8	7	K	Alkaline phosphatase	COO91_03627	70.162	tr|A0A2K8SKR6|A0A2K8SKR6_9NOSO Type II secretory pathway, pseudopilin PulG OS=Nostoc flagelliforme CCNUN1 OX=2038116 GN=COO91_01776 PE=4 SV=1	653	18.403	18.403	MISFLQK(1)YK(1)	MISFLQK(18)YK(18)	7	2	7.5521
A0A2K8SQH8	349	K	Alkaline phosphatase	COO91_03627	70.162	tr|A0A2K8SLI3|A0A2K8SLI3_9NOSO PsaJ, photosystem I subunit IX OS=Nostoc flagelliforme CCNUN1 OX=2038116 GN=COO91_02171 PE=3 SV=1	653	56.378	56.378	TAAK(1)IDPNKGGR	TAAK(53)IDPNK(-53)GGR	4	3	0.25307
A0A2K8SQH8	320	K	Alkaline phosphatase	COO91_03627	70.162	tr|A0A2K8SLN7|A0A2K8SLN7_9NOSO GSR, glutathione reductase OS=Nostoc flagelliforme CCNUN1 OX=2038116 GN=COO91_02263 PE=3 SV=1	653	34.472	34.472	YTYITEDTYQHLK(1)NNPTSNR	YTYITEDTYQHLK(34)NNPTSNR	13	3	0.31653
A0A2K8SQI1	137	K	Uncharacterized protein	COO91_03663	20.678	tr|A0A2K8SLV2|A0A2K8SLV2_9NOSO Phosphate import ATP-binding protein PstB OS=Nostoc flagelliforme CCNUN1 OX=2038116 GN=pstB PE=3 SV=1	183	51.569	36.46	IQAASNENQK(1)SQGFLNR	IQAASNENQK(36)SQGFLNR	10	2	0.31829
A0A2K8SQK3	75	K	Carbonic anhydrase or acetyltransferase, isoleucine patch superfamily	COO91_03664	44.5	tr|A0A2K8SM45|A0A2K8SM45_9NOSO Isocitrate dehydrogenase [NADP] OS=Nostoc flagelliforme CCNUN1 OX=2038116 GN=COO91_02459 PE=3 SV=1	426	51.51	51.51	LGEK(1)VYVAPFAELDATTAPISIAEDSNVQDQVR	LGEK(52)VYVAPFAELDATTAPISIAEDSNVQDQVR	4	3	0.44698
A0A2K8SQK3	299	K	Carbonic anhydrase or acetyltransferase, isoleucine patch superfamily	COO91_03664	44.5	tr|A0A2K8SMI2|A0A2K8SMI2_9NOSO ABC-2.OM, polysaccharide export outer membrane protein OS=Nostoc flagelliforme CCNUN1 OX=2038116 GN=COO91_02428 PE=4 SV=1	426	111.38	52.201	IIGNVVLEDSFATLTDK(1)IGNR	IIGNVVLEDSFATLTDK(52)IGNR	17	2	0.27319
A0A2K8SQK3	127	K	Carbonic anhydrase or acetyltransferase, isoleucine patch superfamily	COO91_03664	44.5	tr|A0A2K8SMJ1|A0A2K8SMJ1_9NOSO Uncharacterized protein OS=Nostoc flagelliforme CCNUN1 OX=2038116 GN=COO91_02549 PE=4 SV=1	426	58.916	58.916	VIMAHMATIK(0.986)GAAK(0.014)	VIMAHMATIK(18)GAAK(-18)	10	2	-3.0242
A0A2K8SQK3	394	K	Carbonic anhydrase or acetyltransferase, isoleucine patch superfamily	COO91_03664	44.5	tr|A0A2K8SMN1|A0A2K8SMN1_9NOSO Uncharacterized protein OS=Nostoc flagelliforme CCNUN1 OX=2038116 GN=COO91_02657 PE=4 SV=1	426	163.93	113.34	SAVGQK(1)SAVFNSTVAPR	SAVGQK(110)SAVFNSTVAPR	6	2	-2.1205
A0A2K8SQK3	192	K	Carbonic anhydrase or acetyltransferase, isoleucine patch superfamily	COO91_03664	44.5	tr|A0A2K8SMQ3|A0A2K8SMQ3_9NOSO Uncharacterized protein OS=Nostoc flagelliforme CCNUN1 OX=2038116 GN=COO91_02609 PE=4 SV=1	426	83.214	83.214	VGPGVTLPAGK(1)VVLPGK	VGPGVTLPAGK(36)VVLPGK(-36)	11	2	-1.1884
A0A2K8SQK3	198	K	Carbonic anhydrase or acetyltransferase, isoleucine patch superfamily	COO91_03664	44.5	tr|A0A2K8SN83|A0A2K8SN83_9NOSO Dihydrolipoamide acetyltransferase component of pyruvate dehydrogenase complex OS=Nostoc flagelliforme CCNUN1 OX=2038116 GN=COO91_02841 PE=3 SV=1	426	81.409	81.409	VVLPGK(1)NVTNNFEATSGSLGK	VVLPGK(74)NVTNNFEATSGSLGK(-74)	6	2	-0.44578
A0A2K8SQL3	565	K	Cytochrome c oxidase subunit 1	COO91_03027	63.661	tr|A0A2K8SNB3|A0A2K8SNB3_9NOSO Putative transposase YdaD OS=Nostoc flagelliforme CCNUN1 OX=2038116 GN=COO91_02840 PE=4 SV=1	578	47.57	47.57	AK(1)PDPAVAANPEDRK	AK(48)PDPAVAANPEDRK(-48)	2	3	0.25136
A0A2K8SQR2	12	K	Putative transposase YbfD/YdcC associated with H repeats	COO91_03710	7.3767	tr|A0A2K8SNB8|A0A2K8SNB8_9NOSO DNA-binding ferritin-like protein OS=Nostoc flagelliforme CCNUN1 OX=2038116 GN=COO91_02738 PE=3 SV=1	64	19.324	19.324	MQSLMALQLGDK(1)K(1)	MQSLMALQLGDK(19)K(19)	12	2	2.8729
A0A2K8SQR2	13	K	Putative transposase YbfD/YdcC associated with H repeats	COO91_03710	7.3767	tr|A0A2K8SNI2|A0A2K8SNI2_9NOSO 5-methylcytosine-specific restriction endonuclease McrA OS=Nostoc flagelliforme CCNUN1 OX=2038116 GN=COO91_02976 PE=4 SV=1	64	19.324	19.324	MQSLMALQLGDK(1)K(1)	MQSLMALQLGDK(19)K(19)	13	2	2.8729
A0A2K8SQR4	83	K	2-keto-4-pentenoate hydratase/2-oxohepta-3-ene-1,7-dioic acid hydratase	COO91_03636	30.454	tr|A0A2K8SNN8|A0A2K8SNN8_9NOSO SixA, phosphohistidine phosphatase OS=Nostoc flagelliforme CCNUN1 OX=2038116 GN=COO91_02981 PE=4 SV=1	275	62.225	62.225	IVAVGK(1)NYAEHAAEMGTPVPSEPLIFLKPPTSIIPSER	IVAVGK(60)NYAEHAAEMGTPVPSEPLIFLK(-60)PPTSIIPSER	6	4	-0.67611
A0A2K8SQR9	467	K	ATP synthase subunit alpha	atpA	54.481	tr|A0A2K8SNV4|A0A2K8SNV4_9NOSO Glucose/arabinose dehydrogenase, beta-propeller fold OS=Nostoc flagelliforme CCNUN1 OX=2038116 GN=COO91_02972 PE=4 SV=1	506	58.476	50.116	EYLK(0.996)TGK(0.004)TQYAEGVR	EYLK(24)TGK(-24)TQYAEGVR	4	3	0.55882
A0A2K8SQU3	29	K	ApcB, allophycocyanin beta subunit	COO91_03781	17.263	tr|A0A2K8SP02|A0A2K8SP02_9NOSO Fructose-1,6-bisphosphate aldolase OS=Nostoc flagelliforme CCNUN1 OX=2038116 GN=COO91_03022 PE=3 SV=1	162	101.82	99.855	LK(1)GYFATGELR	LK(100)GYFATGELR	2	2	0.76416
A0A2K8SQU3	18	K	ApcB, allophycocyanin beta subunit	COO91_03781	17.263	tr|A0A2K8SP12|A0A2K8SP12_9NOSO Mn-containing catalase OS=Nostoc flagelliforme CCNUN1 OX=2038116 GN=COO91_03117 PE=3 SV=1	162	80.389	80.389	AQDAITAVINSADVQGK(1)YLDSSALQK	AQDAITAVINSADVQGK(42)YLDSSALQK(-42)	17	3	1.0116
A0A2K8SQU3	54	K	ApcB, allophycocyanin beta subunit	COO91_03781	17.263	tr|A0A2K8SPA4|A0A2K8SPA4_9NOSO Protoheme ferro-lyase OS=Nostoc flagelliforme CCNUN1 OX=2038116 GN=COO91_02586 PE=4 SV=1	162	126.32	126.32	AASTISANAAAIVK(1)EAVAK	AASTISANAAAIVK(41)EAVAK(-41)	14	2	-1.0029
A0A2K8SQV6	9	K	Ribose-5-phosphate isomerase A	rpiA	24.936	tr|A0A2K8SQ07|A0A2K8SQ07_9NOSO Adenylosuccinate lyase OS=Nostoc flagelliforme CCNUN1 OX=2038116 GN=COO91_03491 PE=3 SV=1	236	47.57	47.57	TAAADPVK(0.982)LMK(0.017)QEVGK	TAAADPVK(18)LMK(-18)QEVGK(-37)	8	2	-0.48709
A0A2K8SQV6	159	K	Ribose-5-phosphate isomerase A	rpiA	24.936	tr|A0A2K8SQ31|A0A2K8SQ31_9NOSO DUF4394 domain-containing protein OS=Nostoc flagelliforme CCNUN1 OX=2038116 GN=COO91_03486 PE=4 SV=1	236	45.489	45.489	K(0.998)LGGK(0.002)PELR	K(27)LGGK(-27)PELR	1	3	0.40136
A0A2K8SQV6	12	K	Ribose-5-phosphate isomerase A	rpiA	24.936	tr|A0A2K8SQ70|A0A2K8SQ70_9NOSO Metal-dependent hydrolase, endonuclease/exonuclease/phosphatase family OS=Nostoc flagelliforme CCNUN1 OX=2038116 GN=COO91_03527 PE=4 SV=1	236	40.861	40.861	TAAADPVK(0.043)LMK(0.955)QEVGK(0.002)	TAAADPVK(-13)LMK(13)QEVGK(-27)	11	2	-0.1937
A0A2K8SQV6	17	K	Ribose-5-phosphate isomerase A	rpiA	24.936	tr|A0A2K8SQI1|A0A2K8SQI1_9NOSO Uncharacterized protein OS=Nostoc flagelliforme CCNUN1 OX=2038116 GN=COO91_03663 PE=4 SV=1	236	16.759	16.759	TAAADPVK(0.041)LMK(0.48)QEVGK(0.48)	TAAADPVK(-11)LMK(0)QEVGK(0)	16	2	-1.7221
A0A2K8SQW3	246	K	FAD/FMN-containing dehydrogenase	COO91_03143	49.225	tr|A0A2K8SQL3|A0A2K8SQL3_9NOSO Cytochrome c oxidase subunit 1 OS=Nostoc flagelliforme CCNUN1 OX=2038116 GN=COO91_03027 PE=3 SV=1	447	44.57	44.57	FGQALGNADGMIK(1)K(1)	FGQALGNADGMIK(45)K(45)	14	2	-7.1793
A0A2K8SQW3	245	K	FAD/FMN-containing dehydrogenase	COO91_03143	49.225	tr|A0A2K8SQR4|A0A2K8SQR4_9NOSO 2-keto-4-pentenoate hydratase/2-oxohepta-3-ene-1,7-dioic acid hydratase OS=Nostoc flagelliforme CCNUN1 OX=2038116 GN=COO91_03636 PE=4 SV=1	447	44.57	44.57	FGQALGNADGMIK(1)K(1)	FGQALGNADGMIK(45)K(45)	13	2	-7.1793
A0A2K8SQX2	132	K	ATP synthase subunit b	atpF	20.381	tr|A0A2K8SQR9|A0A2K8SQR9_9NOSO ATP synthase subunit alpha OS=Nostoc flagelliforme CCNUN1 OX=2038116 GN=atpA PE=3 SV=1	190	66.619	66.619	LK(1)QTAAADLNTETER	LK(67)QTAAADLNTETER	2	2	-2.3238
A0A2K8SR02	52	K	ApcA, allophycocyanin alpha subunit	COO91_03780	17.416	tr|A0A2K8SQX2|A0A2K8SQX2_9NOSO ATP synthase subunit b OS=Nostoc flagelliforme CCNUN1 OX=2038116 GN=atpF PE=3 SV=1	161	69.915	69.915	LVK(1)QAGDQLFQK	LVK(70)QAGDQLFQK(-70)	3	2	0.27554
A0A2K8SR02	117	K	ApcA, allophycocyanin alpha subunit	COO91_03780	17.416	tr|A0A2K8SR19|A0A2K8SR19_9NOSO Anti-sigma factor antagonist OS=Nostoc flagelliforme CCNUN1 OX=2038116 GN=COO91_03819 PE=3 SV=1	161	124.24	80.815	EMYK(1)SLGTPIDGVAEGIR	EMYK(81)SLGTPIDGVAEGIR	4	2	-0.53766
A0A2K8SR02	27	K	ApcA, allophycocyanin alpha subunit	COO91_03780	17.416	tr|A0A2K8SRC6|A0A2K8SRC6_9NOSO Phosphoketolase OS=Nostoc flagelliforme CCNUN1 OX=2038116 GN=COO91_03931 PE=4 SV=1	161	120.33	53.517	IK(1)SFVASGERR	IK(54)SFVASGERR	2	3	0.62452
A0A2K8SR02	6	K	ApcA, allophycocyanin alpha subunit	COO91_03780	17.416	tr|A0A2K8SRI6|A0A2K8SRI6_9NOSO Nucleotide-binding universal stress protein, UspA family OS=Nostoc flagelliforme CCNUN1 OX=2038116 GN=COO91_03988 PE=3 SV=1	161	69.327	69.327	SIVTK(1)AIVNADAEAR	SIVTK(69)AIVNADAEAR	5	2	-0.42989
A0A2K8SR19	6	K	Anti-sigma factor antagonist	COO91_03819	12.042	tr|A0A2K8SRJ5|A0A2K8SRJ5_9NOSO Ricin B, lectin domain OS=Nostoc flagelliforme CCNUN1 OX=2038116 GN=COO91_03998 PE=4 SV=1	108	9.8729	9.8729	MIEQVK(0.803)IIK(0.197)LTGNLNATTSQDFR	MIEQVK(6.1)IIK(-6.1)LTGNLNATTSQDFR	6	4	-0.68133
A0A2K8SR31	210	K	Hemerythrin superfamily protein	COO91_03810	39.172	tr|A0A2K8SRL8|A0A2K8SRL8_9NOSO DNA-directed RNA polymerase subunit beta' OS=Nostoc flagelliforme CCNUN1 OX=2038116 GN=rpoC2 PE=3 SV=1	350	46.206	46.206	LDHNK(1)VNTLFTELLQSDNPQK	LDHNK(46)VNTLFTELLQSDNPQK(-46)	5	3	-0.87531
A0A2K8SR31	280	K	Hemerythrin superfamily protein	COO91_03810	39.172	tr|A0A2K8SRQ0|A0A2K8SRQ0_9NOSO Mobile element protein OS=Nostoc flagelliforme CCNUN1 OX=2038116 GN=COO91_04052 PE=4 SV=1	350	88.42	88.42	LLEEIK(1)AIDPSSSQFKDR	LLEEIK(72)AIDPSSSQFK(-72)DR	6	3	0.46261
A0A2K8SR31	195	K	Hemerythrin superfamily protein	COO91_03810	39.172	tr|A0A2K8SRR4|A0A2K8SRR4_9NOSO dITP/XTP pyrophosphatase OS=Nostoc flagelliforme CCNUN1 OX=2038116 GN=COO91_04124 PE=3 SV=1	350	12.315	12.315	VQDAMAAVSGVVGSAVTQTSDK(1)SDLNIQDVIR	VQDAMAAVSGVVGSAVTQTSDK(12)SDLNIQDVIR	22	3	0.65859
A0A2K8SR31	332	K	Hemerythrin superfamily protein	COO91_03810	39.172	tr|A0A2K8SRR5|A0A2K8SRR5_9NOSO Uncharacterized protein OS=Nostoc flagelliforme CCNUN1 OX=2038116 GN=COO91_03997 PE=4 SV=1	350	153.05	111.38	NNLSSDQSEQLATEFK(0.947)AAK(0.053)	NNLSSDQSEQLATEFK(13)AAK(-13)	16	2	-0.85276
A0A2K8SR31	335	K	Hemerythrin superfamily protein	COO91_03810	39.172	tr|A0A2K8SRT5|A0A2K8SRT5_9NOSO GpmB, putative phosphoglycerate mutase OS=Nostoc flagelliforme CCNUN1 OX=2038116 GN=COO91_04159 PE=4 SV=1	350	48.892	27.467	NNLSSDQSEQLATEFK(0.5)AAK(0.5)	NNLSSDQSEQLATEFK(0)AAK(0)	19	2	-0.36153
A0A2K8SR31	90	K	Hemerythrin superfamily protein	COO91_03810	39.172	tr|A0A2K8SRW3|A0A2K8SRW3_9NOSO RNA ligase/cyclic nucleotide phosphodiesterase OS=Nostoc flagelliforme CCNUN1 OX=2038116 GN=COO91_04189 PE=4 SV=1	350	14.659	14.659	ELFK(0.782)GSELSLYEK(0.186)VSQHELLK(0.033)	ELFK(6.2)GSELSLYEK(-6.2)VSQHELLK(-14)	4	4	0.88915
A0A2K8SR47	210	K	Putative secreted protein	COO91_03849	23.266	tr|A0A2K8SS28|A0A2K8SS28_9NOSO GST, glutathione S-transferase OS=Nostoc flagelliforme CCNUN1 OX=2038116 GN=COO91_04221 PE=4 SV=1;tr|A0A1V0E448|A0A1V0E448_9NOSO Glutathione S-transferase OS=Nostoc flagelliforme OX=1306274 PE=4 SV=1	218	87.942	58.889	IDTIDTTIGPVLFK(1)IR	IDTIDTTIGPVLFK(59)IR	14	2	2.0946
A0A2K8SR47	154	K	Putative secreted protein	COO91_03849	23.266	tr|A0A2K8SS43|A0A2K8SS43_9NOSO Nitrogen regulatory protein P-II OS=Nostoc flagelliforme CCNUN1 OX=2038116 GN=COO91_04125 PE=3 SV=1	218	61.745	42.028	TFNPPFSDVWDK(1)NVGIVLGTINACR	TFNPPFSDVWDK(42)NVGIVLGTINACR	12	3	-0.25142
A0A2K8SR82	9	K	Tetratricopeptide	COO91_03926	23.77	tr|A0A2K8SS66|A0A2K8SS66_9NOSO Fructose-1,6-bisphosphatase class 1 OS=Nostoc flagelliforme CCNUN1 OX=2038116 GN=fbp PE=3 SV=1	208	57.888	57.888	MTQLFIEAK(0.5)ATQK(0.5)	MTQLFIEAK(0)ATQK(0)	9	2	5.5564
A0A2K8SR82	13	K	Tetratricopeptide	COO91_03926	23.77	tr|A0A2K8SS97|A0A2K8SS97_9NOSO Serine--tRNA ligase OS=Nostoc flagelliforme CCNUN1 OX=2038116 GN=serS PE=3 SV=1	208	57.888	57.888	MTQLFIEAK(0.5)ATQK(0.5)	MTQLFIEAK(0)ATQK(0)	13	2	5.5564
A0A2K8SRA5	172	K	Acetylornithine aminotransferase	argD	46.255	tr|A0A2K8SS98|A0A2K8SS98_9NOSO Arginine--tRNA ligase OS=Nostoc flagelliforme CCNUN1 OX=2038116 GN=argS PE=3 SV=1	427	79.311	79.311	TLATITATAQPK(0.5)YQK(0.5)	TLATITATAQPK(0)YQK(0)	12	2	-0.56497
A0A2K8SRA5	175	K	Acetylornithine aminotransferase	argD	46.255	tr|A0A2K8SSL6|A0A2K8SSL6_9NOSO PspA, phage shock protein A OS=Nostoc flagelliforme CCNUN1 OX=2038116 GN=COO91_04416 PE=3 SV=1;tr|A0A1V0E450|A0A1V0E450_9NOSO Phage shock protein A OS=Nostoc flagelliforme OX=1306274 PE=3 SV=1	427	79.311	79.311	TLATITATAQPK(0.5)YQK(0.5)	TLATITATAQPK(0)YQK(0)	15	2	-0.56497
A0A2K8SRC6	318	K	Phosphoketolase	COO91_03931	79.223	tr|A0A2K8SSM5|A0A2K8SSM5_9NOSO ATP synthase gamma chain OS=Nostoc flagelliforme CCNUN1 OX=2038116 GN=atpG PE=3 SV=1	737	21.125	21.125	GAK(0.906)SHNLYPK(0.094)DTLDAPHIVSALQTR	GAK(9.8)SHNLYPK(-9.8)DTLDAPHIVSALQTR	3	4	-0.60838
A0A2K8SRI6	3	K	Nucleotide-binding universal stress protein, UspA family	COO91_03988	15.616	tr|A0A2K8SSX4|A0A2K8SSX4_9NOSO Uncharacterized protein OS=Nostoc flagelliforme CCNUN1 OX=2038116 GN=COO91_03847 PE=4 SV=1	141	41.317	41.317	MLK(1)NILVALDGSEIGER	MLK(41)NILVALDGSEIGER	3	2	-9.0113
A0A2K8SRJ5	97	K	Ricin B, lectin domain	COO91_03998	13.729	tr|A0A2K8SSZ3|A0A2K8SSZ3_9NOSO Photosystem I reaction center subunit XI OS=Nostoc flagelliforme CCNUN1 OX=2038116 GN=psaL PE=3 SV=1	126	11.68	11.68	TQFTGADK(0.788)CLDIINDGINNK(0.136)PVIAK(0.076)	TQFTGADK(7.6)CLDIINDGINNK(-7.6)PVIAK(-10)	8	3	0.080053
A0A2K8SRL8	964	K	DNA-directed RNA polymerase subunit beta'	rpoC2	146.96	tr|A0A2K8ST31|A0A2K8ST31_9NOSO PsaX, photosystem I 4.8kDa protein OS=Nostoc flagelliforme CCNUN1 OX=2038116 GN=COO91_04589 PE=4 SV=1	1348	17.813	17.813	SATAASGEESALSTK(1)NYVVTTR	SATAASGEESALSTK(18)NYVVTTR	15	2	-0.27197
A0A2K8SRM6	11	K	Recombinational DNA repair protein RecT	COO91_03410	26.215	tr|A0A2K8ST58|A0A2K8ST58_9NOSO DNA-binding response regulator, OmpR family, containings REC and winged-helix OS=Nostoc flagelliforme CCNUN1 OX=2038116 GN=COO91_04591 PE=4 SV=1	233	16.652	16.652	MTPQLNLALAK(1)AK(1)	MTPQLNLALAK(17)AK(17)	11	3	-5.6959
A0A2K8SRM6	13	K	Recombinational DNA repair protein RecT	COO91_03410	26.215	tr|A0A2K8STD0|A0A2K8STD0_9NOSO CcmK, carbon dioxide concentrating mechanism protein CcmK OS=Nostoc flagelliforme CCNUN1 OX=2038116 GN=COO91_04649 PE=4 SV=1	233	16.652	16.652	MTPQLNLALAK(1)AK(1)	MTPQLNLALAK(17)AK(17)	13	3	-5.6959
A0A2K8SRQ0	12	K	Mobile element protein	COO91_04052	9.9408	tr|A0A2K8STQ9|A0A2K8STQ9_9NOSO Putative conserved protein UCP026449 OS=Nostoc flagelliforme CCNUN1 OX=2038116 GN=COO91_04813 PE=4 SV=1	86	16.652	16.652	MK(0.02)IENAK(0.07)QLTAK(0.911)	MK(-17)IENAK(-11)QLTAK(11)	12	2	-6.2603
A0A2K8SRR1	24	K	Uncharacterized protein	COO91_04101	5.7694	tr|A0A2K8STT5|A0A2K8STT5_9NOSO Six-bladed beta-propeller, TolB-like OS=Nostoc flagelliforme CCNUN1 OX=2038116 GN=COO91_04828 PE=4 SV=1	50	21.134	21.134	NISEWLDDTGYK(0.816)NQSIK(0.816)VSGLDLSPDK(0.368)	NISEWLDDTGYK(5.4)NQSIK(5.4)VSGLDLSPDK(-5.4)	12	4	-1.9341
A0A2K8SRR1	29	K	Uncharacterized protein	COO91_04101	5.7694	tr|A0A2K8SU64|A0A2K8SU64_9NOSO Glycoside hydrolase 38/57, N-terminal domain OS=Nostoc flagelliforme CCNUN1 OX=2038116 GN=COO91_04984 PE=3 SV=1	50	21.134	21.134	NISEWLDDTGYK(0.816)NQSIK(0.816)VSGLDLSPDK(0.368)	NISEWLDDTGYK(5.4)NQSIK(5.4)VSGLDLSPDK(-5.4)	17	4	-1.9341
A0A2K8SRR4	89	K	dITP/XTP pyrophosphatase	COO91_04124	20.952	tr|A0A2K8SUD5|A0A2K8SUD5_9NOSO PRDX2_4, peroxiredoxin OS=Nostoc flagelliforme CCNUN1 OX=2038116 GN=COO91_05057 PE=3 SV=1	192	93.561	51.864	YAK(1)TDSERIAR	YAK(52)TDSERIAR	3	2	-0.0020816
A0A2K8SRR5	302	K	Uncharacterized protein	COO91_03997	49.718	tr|A0A2K8SUJ8|A0A2K8SUJ8_9NOSO Signal transduction histidine kinase OS=Nostoc flagelliforme CCNUN1 OX=2038116 GN=COO91_05124 PE=4 SV=1	443	36.514	36.514	K(1)AEQVTALSHPR	K(37)AEQVTALSHPR	1	3	0.97827
A0A2K8SRT5	94	K	GpmB, putative phosphoglycerate mutase	COO91_04159	23.911	tr|A0A2K8SUU1|A0A2K8SUU1_9NOSO Periplasmic protein refolding chaperone Spy/CpxP family OS=Nostoc flagelliforme CCNUN1 OX=2038116 GN=COO91_05216 PE=4 SV=1	212	56.938	56.938	SK(1)SFTQENYAENYVK	SK(57)SFTQENYAENYVK(-57)	2	2	1.0947
A0A2K8SRW3	33	K	RNA ligase/cyclic nucleotide phosphodiesterase	COO91_04189	30.755	tr|A0A2K8SUV5|A0A2K8SUV5_9NOSO Uncaracterized surface protein containing fasciclin OS=Nostoc flagelliforme CCNUN1 OX=2038116 GN=COO91_05233 PE=4 SV=1	262	81.908	29.115	SQVQHIQESSK(1)FQPHSGLR	SQVQHIQESSK(29)FQPHSGLR	11	4	1.6747
A0A2K8SS28	107	K	GST, glutathione S-transferase	COO91_04221	29.513	tr|A0A2K8SUW3|A0A2K8SUW3_9NOSO 4-amino-4-deoxy-L-arabinose transferase or related glycosyltransferase of PMT family OS=Nostoc flagelliforme CCNUN1 OX=2038116 GN=COO91_05190 PE=4 SV=1	264	31.04	31.04	K(0.999)ALFAAISQDQNFRK(0.001)	K(31)ALFAAISQDQNFRK(-31)	1	3	3.4357
A0A2K8SS43	90	K	Nitrogen regulatory protein P-II	COO91_04125	12.478	tr|A0A2K8SVE1|A0A2K8SVE1_9NOSO N-acetylmuramoyl-L-alanine amidase OS=Nostoc flagelliforme CCNUN1 OX=2038116 GN=COO91_05410 PE=4 SV=1	112	126.63	80.379	TGEIGDGK(1)IFISPVEQVIR	TGEIGDGK(80)IFISPVEQVIR	8	2	0.30474
A0A2K8SS44	78	K	PhoD, alkaline phosphatase D	COO91_04108	60.261	tr|A0A2K8SVG6|A0A2K8SVG6_9NOSO Ketol-acid reductoisomerase (NADP(+)) OS=Nostoc flagelliforme CCNUN1 OX=2038116 GN=ilvC PE=3 SV=1	533	12.851	12.851	SDRPAK(0.951)MIVEYSTSESFK(0.049)	SDRPAK(13)MIVEYSTSESFK(-13)	6	3	-0.42732
A0A2K8SS44	225	K	PhoD, alkaline phosphatase D	COO91_04108	60.261	tr|A0A2K8SVH2|A0A2K8SVH2_9NOSO Single-stranded DNA-binding protein OS=Nostoc flagelliforme CCNUN1 OX=2038116 GN=COO91_05405 PE=3 SV=1	533	64.064	64.064	SK(1)VAETLTEYR	SK(64)VAETLTEYR	2	2	-0.021129
A0A2K8SS44	133	K	PhoD, alkaline phosphatase D	COO91_04108	60.261	tr|A0A2K8SW52|A0A2K8SW52_9NOSO Uncharacterized protein OS=Nostoc flagelliforme CCNUN1 OX=2038116 GN=COO91_05687 PE=4 SV=1	533	63.79	63.79	VIFQDLDYK(0.999)GTYSAPVK(0.001)	VIFQDLDYK(33)GTYSAPVK(-33)	9	2	-0.26915
A0A2K8SS44	102	K	PhoD, alkaline phosphatase D	COO91_04108	60.261	tr|A0A2K8SWW8|A0A2K8SWW8_9NOSO Methylase of polypeptide chain release factors OS=Nostoc flagelliforme CCNUN1 OX=2038116 GN=COO91_05921 PE=4 SV=1	533	58.476	38.584	VVGPNALK(1)NSDFTAR	VVGPNALK(39)NSDFTAR	8	2	-0.43896
A0A2K8SS44	348	K	PhoD, alkaline phosphatase D	COO91_04108	60.261	tr|A0A2K8SX21|A0A2K8SX21_9NOSO RbcS, ribulose-bisphosphate carboxylase small chain OS=Nostoc flagelliforme CCNUN1 OX=2038116 GN=COO91_05983 PE=4 SV=1	533	36.059	15.548	GPNTPNRQPVPSK(1)ETEMLGR	GPNTPNRQPVPSK(16)ETEMLGR	13	3	-0.016517
A0A2K8SS57	200	K	Phosphate-binding protein	COO91_04193	37.057	tr|A0A2K8SX59|A0A2K8SX59_9NOSO Rhodanese-related sulfurtransferase OS=Nostoc flagelliforme CCNUN1 OX=2038116 GN=COO91_06019 PE=4 SV=1	347	35.33	35.33	VGANTAPK(0.963)WNLPNVLK(0.037)	VGANTAPK(14)WNLPNVLK(-14)	8	2	-1.1808
A0A2K8SS57	150	K	Phosphate-binding protein	COO91_04193	37.057	tr|A0A2K8SXJ0|A0A2K8SXJ0_9NOSO AROA2, 3-deoxy-7-phosphoheptulonate synthase OS=Nostoc flagelliforme CCNUN1 OX=2038116 GN=COO91_06163 PE=4 SV=1	347	71.219	71.219	IK(1)ADNPAANLPNQTIK	IK(71)ADNPAANLPNQTIK(-71)	2	2	-0.58715
A0A2K8SS57	248	K	Phosphate-binding protein	COO91_04193	37.057	tr|A0A2K8SXM2|A0A2K8SXM2_9NOSO PpgK, polyphosphate glucokinase OS=Nostoc flagelliforme CCNUN1 OX=2038116 GN=COO91_06204 PE=4 SV=1	347	13.559	13.559	K(1)GEFVAPSLQSANAALATVSFPDNYR	K(14)GEFVAPSLQSANAALATVSFPDNYR	1	3	3.0248
A0A2K8SS57	143	K	Phosphate-binding protein	COO91_04193	37.057	tr|A0A2K8SY00|A0A2K8SY00_9NOSO Inorganic pyrophosphatase OS=Nostoc flagelliforme CCNUN1 OX=2038116 GN=ppa PE=3 SV=1	347	32.61	32.61	STLPAIYSGQITK(0.855)WNDPK(0.145)	STLPAIYSGQITK(7.7)WNDPK(-7.7)	13	2	1.3832
A0A2K8SS57	346	K	Phosphate-binding protein	COO91_04193	37.057	tr|A0A2K8SYR6|A0A2K8SYR6_9NOSO 30S ribosomal protein S5 OS=Nostoc flagelliforme CCNUN1 OX=2038116 GN=rpsE PE=3 SV=1	347	67.881	67.881	VLQTVNSSVK(1)P	VLQTVNSSVK(68)P	10	2	0.86139
A0A2K8SS66	117	K	Fructose-1,6-bisphosphatase class 1	fbp	38.672	tr|A0A2K8SZ70|A0A2K8SZ70_9NOSO N-acetylmuramoyl-L-alanine amidase OS=Nostoc flagelliforme CCNUN1 OX=2038116 GN=COO91_06767 PE=4 SV=1	349	31.767	31.767	LASEEMEK(1)PYYIPENCPIGR	LASEEMEK(32)PYYIPENCPIGR	8	2	0.5888
A0A2K8SS87	205	K	Uncharacterized protein	COO91_03621	78.721	tr|A0A2K8SZC9|A0A2K8SZC9_9NOSO Bifunctional protein PyrR OS=Nostoc flagelliforme CCNUN1 OX=2038116 GN=pyrR PE=3 SV=1	720	29.98	29.98	K(0.999)SQAAHGVSVVEISK(0.001)	K(29)SQAAHGVSVVEISK(-29)	1	3	0.94636
A0A2K8SS87	321	K	Uncharacterized protein	COO91_03621	78.721	tr|A0A2K8SZP6|A0A2K8SZP6_9NOSO Uncharacterized protein OS=Nostoc flagelliforme CCNUN1 OX=2038116 GN=COO91_06852 PE=4 SV=1	720	53.051	28.277	DVVAIPGIEK(1)SDILAGQNR	DVVAIPGIEK(28)SDILAGQNR	10	2	-1.2108
A0A2K8SS87	476	K	Uncharacterized protein	COO91_03621	78.721	tr|A0A2K8SZS3|A0A2K8SZS3_9NOSO PPC domain-containing protein OS=Nostoc flagelliforme CCNUN1 OX=2038116 GN=COO91_06955 PE=4 SV=1	720	126.29	126.29	SQAEVLVK(1)TR	SQAEVLVK(130)TR	8	2	0.38541
A0A2K8SS97	63	K	Serine--tRNA ligase	serS	47.592	tr|A0A2K8SZV9|A0A2K8SZV9_9NOSO FbaB, fructose-bisphosphate aldolase, class I OS=Nostoc flagelliforme CCNUN1 OX=2038116 GN=COO91_07008 PE=4 SV=1	426	27.94	27.94	IK(0.998)SGINSQDPEIQALRDEGNSVK(0.002)	IK(28)SGINSQDPEIQALRDEGNSVK(-28)	2	3	-0.74255
A0A2K8SS98	130	K	Arginine--tRNA ligase	argS	65.806	tr|A0A2K8T0C4|A0A2K8T0C4_9NOSO PPC domain-containing protein OS=Nostoc flagelliforme CCNUN1 OX=2038116 GN=COO91_07091 PE=4 SV=1	587	48.363	48.363	REIVDFSSPNIAK(1)EMHVGHLR	REIVDFSSPNIAK(48)EMHVGHLR	13	4	1.9564
A0A2K8SSC2	13	K	NAD(P)H-quinone oxidoreductase subunit J	ndhJ	20.244	tr|A0A2K8T0D2|A0A2K8T0D2_9NOSO Uncharacterized protein OS=Nostoc flagelliforme CCNUN1 OX=2038116 GN=COO91_07201 PE=4 SV=1	176	43.177	43.177	AEEESK(0.003)PVPAAK(0.994)EESLVQAGK(0.002)	AEEESK(-25)PVPAAK(25)EESLVQAGK(-26)	12	3	1.308
A0A2K8SSC2	7	K	NAD(P)H-quinone oxidoreductase subunit J	ndhJ	20.244	tr|A0A2K8T0M2|A0A2K8T0M2_9NOSO Uncharacterized protein OS=Nostoc flagelliforme CCNUN1 OX=2038116 GN=COO91_07289 PE=4 SV=1	176	31.138	31.138	AEEESK(0.988)PVPAAK(0.01)EESLVQAGK(0.002)	AEEESK(20)PVPAAK(-20)EESLVQAGK(-27)	6	3	2.7771
A0A2K8SSF3	168	K	Cytochrome c peroxidase	COO91_03684	71.033	tr|A0A2K8T0M5|A0A2K8T0M5_9NOSO SAM50, outer membrane protein insertion porin family OS=Nostoc flagelliforme CCNUN1 OX=2038116 GN=COO91_07306 PE=4 SV=1	657	91.939	42.941	DLETSEPDPVFK(1)VGGINVR	DLETSEPDPVFK(43)VGGINVR	12	2	-0.82707
A0A2K8SSF3	221	K	Cytochrome c peroxidase	COO91_03684	71.033	tr|A0A2K8T0Y0|A0A2K8T0Y0_9NOSO Carbohydrate-selective porin OprB OS=Nostoc flagelliforme CCNUN1 OX=2038116 GN=COO91_06684 PE=3 SV=1	657	47.57	47.57	DPNASVVK(0.998)AENPNQLK(0.002)	DPNASVVK(26)AENPNQLK(-26)	8	2	-1.3828
A0A2K8SSL6	81	K	PspA, phage shock protein A	COO91_04416	28.743	tr|A0A2K8T196|A0A2K8T196_9NOSO Putative membrane protein OS=Nostoc flagelliforme CCNUN1 OX=2038116 GN=COO91_07515 PE=4 SV=1	258	38.1	38.1	NAQLALQK(1)GDENLAR	NAQLALQK(38)GDENLAR	8	2	-1.078
A0A2K8SSM5	214	K	ATP synthase gamma chain	atpG	35.097	tr|A0A2K8T1A0|A0A2K8T1A0_9NOSO Xaa-Pro aminopeptidase OS=Nostoc flagelliforme CCNUN1 OX=2038116 GN=COO91_07524 PE=4 SV=1	315	31.952	31.952	GGK(0.999)FEVEREK(0.001)	GGK(31)FEVEREK(-31)	3	3	1.852
A0A2K8SSP1	2	K	Uncharacterized protein	COO91_04411	11.078	tr|A0A2K8T1W7|A0A2K8T1W7_9NOSO Uncharacterized protein OS=Nostoc flagelliforme CCNUN1 OX=2038116 GN=COO91_07750 PE=4 SV=1	103	12.596	12.596	MK(1)PIK(1)FLASACK(1)	MK(13)PIK(13)FLASACK(13)	2	2	-9.6315
A0A2K8SSP1	5	K	Uncharacterized protein	COO91_04411	11.078	tr|A0A2K8T2E7|A0A2K8T2E7_9NOSO Nucleoside diphosphate kinase OS=Nostoc flagelliforme CCNUN1 OX=2038116 GN=ndk PE=3 SV=1	103	12.596	12.596	MK(1)PIK(1)FLASACK(1)	MK(13)PIK(13)FLASACK(13)	5	2	-9.6315
A0A2K8SSP1	12	K	Uncharacterized protein	COO91_04411	11.078	tr|A0A2K8T2I5|A0A2K8T2I5_9NOSO Uncharacterized protein OS=Nostoc flagelliforme CCNUN1 OX=2038116 GN=COO91_08009 PE=4 SV=1	103	12.596	12.596	MK(1)PIK(1)FLASACK(1)	MK(13)PIK(13)FLASACK(13)	12	2	-9.6315
A0A2K8SSS1	184	K	D-fructose 1,6-bisphosphatase class 2/sedoheptulose 1,7-bisphosphatase	COO91_04476	36.947	tr|A0A2K8T2U2|A0A2K8T2U2_9NOSO Signal transduction histidine kinase regulating C4-dicarboxylate transport system OS=Nostoc flagelliforme CCNUN1 OX=2038116 GN=COO91_08126 PE=4 SV=1	345	67.507	58.916	ERHNDLIK(1)EIR	ERHNDLIK(59)EIR	8	3	0.50799
A0A2K8SSS1	252	K	D-fructose 1,6-bisphosphatase class 2/sedoheptulose 1,7-bisphosphatase	COO91_04476	36.947	tr|A0A2K8T3I4|A0A2K8T3I4_9NOSO Radical SAM superfamily enzyme, MoaA/NifB/PqqE/SkfB family OS=Nostoc flagelliforme CCNUN1 OX=2038116 GN=COO91_08366 PE=4 SV=1	345	35.537	35.537	ALGGHFQGQLIYDPAVVK(1)TGLIGENR	ALGGHFQGQLIYDPAVVK(36)TGLIGENR	18	3	2.9676
A0A2K8SSS1	29	K	D-fructose 1,6-bisphosphatase class 2/sedoheptulose 1,7-bisphosphatase	COO91_04476	36.947	tr|A0A2K8T4N3|A0A2K8T4N3_9NOSO Putative Rossmann fold nucleotide-binding protein DprA/Smf involved in DNA uptake OS=Nostoc flagelliforme CCNUN1 OX=2038116 GN=COO91_08822 PE=4 SV=1	345	45.654	45.654	WMGK(0.039)GEK(0.961)DIADQVAVEAMR	WMGK(-14)GEK(14)DIADQVAVEAMR	7	3	1.9452
A0A2K8SSS1	156	K	D-fructose 1,6-bisphosphatase class 2/sedoheptulose 1,7-bisphosphatase	COO91_04476	36.947	tr|A0A2K8T4Q3|A0A2K8T4Q3_9NOSO Carbohydrate-selective porin OprB OS=Nostoc flagelliforme CCNUN1 OX=2038116 GN=COO91_08842 PE=3 SV=1	345	82.437	62.705	SATENLK(1)ILSECLER	SATENLK(63)ILSECLER	7	2	4.5339
A0A2K8SSS1	325	K	D-fructose 1,6-bisphosphatase class 2/sedoheptulose 1,7-bisphosphatase	COO91_04476	36.947	tr|A0A2K8T4Y8|A0A2K8T4Y8_9NOSO Transposase OS=Nostoc flagelliforme CCNUN1 OX=2038116 GN=COO91_08913 PE=4 SV=1;tr|A0A2K8SZB0|A0A2K8SZB0_9NOSO Transposase OS=Nostoc flagelliforme CCNUN1 OX=2038116 GN=COO91_06815 PE=4 SV=1;tr|A0A2K8SP55|A0A2K8SP55_9NOSO Trans	345	128.57	61.194	TQSLVISNQSK(1)TAR	TQSLVISNQSK(61)TAR	11	2	-0.29521
A0A2K8SSS1	26	K	D-fructose 1,6-bisphosphatase class 2/sedoheptulose 1,7-bisphosphatase	COO91_04476	36.947	tr|A0A2K8T526|A0A2K8T526_9NOSO NudF, ADP-ribose pyrophosphatase OS=Nostoc flagelliforme CCNUN1 OX=2038116 GN=COO91_08907 PE=4 SV=1	345	21.376	19.006	WMGK(0.5)GEK(0.5)DIADQVAVEAMR	WMGK(0)GEK(0)DIADQVAVEAMR	4	3	2.3233
A0A2K8SST9	8	K	Glutaredoxin	COO91_04486	12.166	tr|A0A2K8T533|A0A2K8T533_9NOSO Uncharacterized protein OS=Nostoc flagelliforme CCNUN1 OX=2038116 GN=COO91_08963 PE=4 SV=1	108	13.778	13.778	EK(1)IDNLLQQNK(1)IMVFMK(1)	EK(14)IDNLLQQNK(14)IMVFMK(14)	2	2	-7.6945
A0A2K8SST9	17	K	Glutaredoxin	COO91_04486	12.166	tr|A0A2K8T5D9|A0A2K8T5D9_9NOSO Bacterial EndoU nuclease OS=Nostoc flagelliforme CCNUN1 OX=2038116 GN=COO91_09020 PE=4 SV=1	108	13.778	13.778	EK(1)IDNLLQQNK(1)IMVFMK(1)	EK(14)IDNLLQQNK(14)IMVFMK(14)	11	2	-7.6945
A0A2K8SST9	23	K	Glutaredoxin	COO91_04486	12.166	tr|A0A2K8T5V6|A0A2K8T5V6_9NOSO Uncharacterized protein OS=Nostoc flagelliforme CCNUN1 OX=2038116 GN=COO91_09117 PE=4 SV=1	108	13.778	13.778	EK(1)IDNLLQQNK(1)IMVFMK(1)	EK(14)IDNLLQQNK(14)IMVFMK(14)	17	2	-7.6945
A0A2K8SSX4	80	K	Uncharacterized protein	COO91_03847	22.67	tr|A0A2K8T620|A0A2K8T620_9NOSO DNA primase OS=Nostoc flagelliforme CCNUN1 OX=2038116 GN=COO91_09228 PE=4 SV=1	212	81.335	76.605	PSVISK(1)SCNLR	PSVISK(77)SCNLR	6	2	-0.28207
A0A2K8SSZ3	9	K	Photosystem I reaction center subunit XI	psaL	18.366	tr|A0A2K8T6M6|A0A2K8T6M6_9NOSO Uncharacterized protein OS=Nostoc flagelliforme CCNUN1 OX=2038116 GN=COO91_09533 PE=4 SV=1	173	123.92	61.194	AQAVDASK(1)NLPSDPR	AQAVDASK(61)NLPSDPR	8	2	-1.8981
A0A2K8ST31	7	K	PsaX, photosystem I 4.8kDa protein	COO91_04589	5.133	tr|A0A2K8T760|A0A2K8T760_9NOSO Putative dehydrogenase OS=Nostoc flagelliforme CCNUN1 OX=2038116 GN=COO91_09670 PE=4 SV=1	46	46.768	46.768	TTK(1)NLPVADSGAKPPYAFR	TTK(45)NLPVADSGAK(-45)PPYAFR	3	3	-0.2002
A0A2K8ST58	53	K	DNA-binding response regulator, OmpR family, containings REC and winged-helix	COO91_04591	68.3	tr|A0A2K8T7C6|A0A2K8T7C6_9NOSO Autotransporter translocation and assembly factor TamB OS=Nostoc flagelliforme CCNUN1 OX=2038116 GN=COO91_09674 PE=4 SV=1	624	13.525	13.525	LWLESSLNQLQSRLNDCLLSACK(1)	LWLESSLNQLQSRLNDCLLSACK(14)	23	4	2.4474
A0A2K8ST67	28	K	Photosystem I P700 chlorophyll a apoprotein A1	psaA	83.295	tr|A0A2K8T8P6|A0A2K8T8P6_9NOSO DNA-binding response regulator, OmpR family, containings REC and winged-helix OS=Nostoc flagelliforme CCNUN1 OX=2038116 GN=COO91_10258 PE=4 SV=1	752	55.866	55.866	VIVDNDPVPTSFEK(1)WAQPGHFDR	VIVDNDPVPTSFEK(56)WAQPGHFDR	14	3	1.5323
A0A2K8ST67	709	K	Photosystem I P700 chlorophyll a apoprotein A1	psaA	83.295	tr|A0A2K8T8Q6|A0A2K8T8Q6_9NOSO Beta-mannanase OS=Nostoc flagelliforme CCNUN1 OX=2038116 GN=COO91_10245 PE=3 SV=1	752	90.308	90.308	LK(1)VAPAIQPR	LK(90)VAPAIQPR	2	2	-0.44518
A0A2K8ST74	373	K	Chromosome segregation ATPase	COO91_04631	116.75	tr|A0A2K8T8Z9|A0A2K8T8Z9_9NOSO Uncharacterized protein OS=Nostoc flagelliforme CCNUN1 OX=2038116 GN=COO91_10351 PE=4 SV=1	1039	54.309	54.309	LK(0.5)EK(0.5)VQDVDVNQITEQLQK	LK(0)EK(0)VQDVDVNQITEQLQK(-54)	4	3	-0.63063
A0A2K8ST74	371	K	Chromosome segregation ATPase	COO91_04631	116.75	tr|A0A2K8T9M3|A0A2K8T9M3_9NOSO FUCA, alpha-L-fucosidase OS=Nostoc flagelliforme CCNUN1 OX=2038116 GN=COO91_10617 PE=4 SV=1	1039	54.309	54.309	LK(0.5)EK(0.5)VQDVDVNQITEQLQK	LK(0)EK(0)VQDVDVNQITEQLQK(-54)	2	3	-0.63063
A0A2K8ST95	248	K	Elongation factor Tu	tuf	44.642	tr|A0A2K8TAA0|A0A2K8TAA0_9NOSO Uncharacterized protein OS=Nostoc flagelliforme CCNUN1 OX=2038116 GN=COO91_10862 PE=4 SV=1	409	47.915	24.922	GVVK(1)VGDNVELVGIRDTR	GVVK(25)VGDNVELVGIRDTR	4	3	-1.1794
A0A2K8ST95	274	K	Elongation factor Tu	tuf	44.642	tr|A0A2K8TAG4|A0A2K8TAG4_9NOSO Serine/threonine protein kinase OS=Nostoc flagelliforme CCNUN1 OX=2038116 GN=COO91_10889 PE=4 SV=1	409	44.045	27.467	K(1)SLDQGMAGDNAGVLLR	K(27)SLDQGMAGDNAGVLLR	1	2	-0.91805
A0A2K8ST99	36	K	CcmK, carbon dioxide concentrating mechanism protein CcmK	COO91_04648	12.304	tr|A0A2K8TAJ5|A0A2K8TAJ5_9NOSO Arc-type ribbon-helix-helix OS=Nostoc flagelliforme CCNUN1 OX=2038116 GN=COO91_10957 PE=4 SV=1	114	69.276	69.276	VTLVGYEK(1)IGSGR	VTLVGYEK(69)IGSGR	8	2	0.33174
A0A2K8ST99	65	K	CcmK, carbon dioxide concentrating mechanism protein CcmK	COO91_04648	12.304	tr|A0A2K8TB22|A0A2K8TB22_9NOSO Deoxyribonuclease I OS=Nostoc flagelliforme CCNUN1 OX=2038116 GN=COO91_11151 PE=4 SV=1	114	95.345	95.345	GDVSEVQASVGAGVESVK(1)R	GDVSEVQASVGAGVESVK(95)R	18	2	0.54781
A0A2K8STA7	17	K	Uncharacterized protein	COO91_04550	4.7315	tr|A0A2K8TB79|A0A2K8TB79_9NOSO Uncharacterized protein OS=Nostoc flagelliforme CCNUN1 OX=2038116 GN=COO91_11202 PE=4 SV=1	41	10.079	10.079	TLK(1)LAICK(1)	TLK(10)LAICK(10)	3	1	9.953
A0A2K8STA7	22	K	Uncharacterized protein	COO91_04550	4.7315	tr|E7DPV4|E7DPV4_9NOSO Uncharacterized protein OS=Nostoc flagelliforme str. Sunitezuoqi OX=676037 GN=Nfla_4706 PE=3 SV=1;tr|A0A2K8SQ63|A0A2K8SQ63_9NOSO GTP cyclohydrolase 1 type 2, NIF3 family OS=Nostoc flagelliforme CCNUN1 OX=2038116 GN=COO91_03548 PE=3 S	41	10.079	10.079	TLK(1)LAICK(1)	TLK(10)LAICK(10)	8	1	9.953
A0A2K8STD0	36	K	CcmK, carbon dioxide concentrating mechanism protein CcmK	COO91_04649	10.911	tr|A0A1L5SMA2|A0A1L5SMA2_9NOSO 6-phosphogluconate dehydrogenase, decarboxylating OS=Nostoc commune var. flagelliforme NX-09 OX=1928915 PE=3 SV=1;tr|A0A2K8T0Q1|A0A2K8T0Q1_9NOSO 6-phosphogluconate dehydrogenase, decarboxylating OS=Nostoc flagelliforme CCNUN1	102	86.243	86.243	VTLVGYEK(1)IGSAR	VTLVGYEK(86)IGSAR	8	2	-0.87148
A0A2K8STF2	7	K	Photosystem I P700 chlorophyll a apoprotein A2	psaB	83.274	tr|A0A2K8SGF7|A0A2K8SGF7_9NOSO Transposase OS=Nostoc flagelliforme CCNUN1 OX=2038116 GN=COO91_00353 PE=4 SV=1	743	28.432	20.29	ATK(0.168)FPK(0.832)FSQDLAQDPTTR	ATK(-6.9)FPK(6.9)FSQDLAQDPTTR	6	3	-0.38949
A0A2K8STF2	410	K	Photosystem I P700 chlorophyll a apoprotein A2	psaB	83.274	tr|A0A2K8SGU2|A0A2K8SGU2_9NOSO Glycerophosphoryl diester phosphodiesterase OS=Nostoc flagelliforme CCNUN1 OX=2038116 GN=COO91_00478 PE=4 SV=1	743	47.57	42.446	DYDPEQNK(1)GNVLER	DYDPEQNK(42)GNVLER	8	2	-1.3225
A0A2K8STQ9	42	K	Putative conserved protein UCP026449	COO91_04813	52.617	tr|A0A2K8SGU2|A0A2K8SGU2_9NOSO Glycerophosphoryl diester phosphodiesterase OS=Nostoc flagelliforme CCNUN1 OX=2038116 GN=COO91_00478 PE=4 SV=1	462	36.24	36.24	LYNK(1)ASQVVIAR	LYNK(36)ASQVVIAR	4	2	-0.070593
A0A2K8STT5	380	K	Six-bladed beta-propeller, TolB-like	COO91_04828	42.815	tr|A0A2K8SGU2|A0A2K8SGU2_9NOSO Glycerophosphoryl diester phosphodiesterase OS=Nostoc flagelliforme CCNUN1 OX=2038116 GN=COO91_00478 PE=4 SV=1	401	21.668	21.668	YETPNAVYNIDK(1)NSGNMTR	YETPNAVYNIDK(22)NSGNMTR	12	2	-0.21391
A0A2K8SU64	270	K	Glycoside hydrolase 38/57, N-terminal domain	COO91_04984	59.733	tr|A0A2K8SGU2|A0A2K8SGU2_9NOSO Glycerophosphoryl diester phosphodiesterase OS=Nostoc flagelliforme CCNUN1 OX=2038116 GN=COO91_00478 PE=4 SV=1	505	20.659	20.659	NTGIK(0.804)YHK(0.196)	NTGIK(6.1)YHK(-6.1)	5	1	-0.21973
A0A2K8SUD5	97	K	PRDX2_4, peroxiredoxin	COO91_05057	22.502	tr|A0A2K8SGU2|A0A2K8SGU2_9NOSO Glycerophosphoryl diester phosphodiesterase OS=Nostoc flagelliforme CCNUN1 OX=2038116 GN=COO91_00478 PE=4 SV=1	203	45.17	45.17	K(1)SGGVGDLNYPLVSDIKK	K(45)SGGVGDLNYPLVSDIK(-45)K(-45)	1	3	2.6146
A0A2K8SUJ8	27	K	Signal transduction histidine kinase	COO91_05124	44.24	tr|A0A2K8SGU2|A0A2K8SGU2_9NOSO Glycerophosphoryl diester phosphodiesterase OS=Nostoc flagelliforme CCNUN1 OX=2038116 GN=COO91_00478 PE=4 SV=1	393	11.68	11.68	MLISLQQLLPNICVIGERCIQQQSSSK(1)	MLISLQQLLPNICVIGERCIQQQSSSK(12)	27	4	8.9641
A0A2K8SUN2	387	K	Uncharacterized protein	COO91_05168	61.709	tr|A0A2K8SGX5|A0A2K8SGX5_9NOSO Stress response protein YsnF OS=Nostoc flagelliforme CCNUN1 OX=2038116 GN=COO91_00525 PE=4 SV=1	558	12.003	12.003	LLAQAEMADMIMAPAADMFEMGVK(0.5)LQVLK(0.5)	LLAQAEMADMIMAPAADMFEMGVK(0)LQVLK(0)	29	3	0.48454
A0A2K8SUN2	382	K	Uncharacterized protein	COO91_05168	61.709	tr|A0A2K8SGX5|A0A2K8SGX5_9NOSO Stress response protein YsnF OS=Nostoc flagelliforme CCNUN1 OX=2038116 GN=COO91_00525 PE=4 SV=1	558	12.003	9.9197	LLAQAEMADMIMAPAADMFEMGVK(0.572)LQVLK(0.428)	LLAQAEMADMIMAPAADMFEMGVK(1.9)LQVLK(-1.9)	24	3	-0.86874
A0A2K8SUN8	157	K	Prokaryotic membrane lipoprotein lipid attachment site profile	COO91_05153	21.426	tr|A0A2K8SHB5|A0A2K8SHB5_9NOSO Chemotaxis signal transduction protein OS=Nostoc flagelliforme CCNUN1 OX=2038116 GN=COO91_00651 PE=4 SV=1	198	43.518	33.456	GIENLK(0.999)GNTQNAAEGVTK(0.001)	GIENLK(29)GNTQNAAEGVTK(-29)	6	2	0.47278
A0A2K8SUN8	128	K	Prokaryotic membrane lipoprotein lipid attachment site profile	COO91_05153	21.426	tr|A0A2K8SHE4|A0A2K8SHE4_9NOSO Harbinger transposase-derived nuclease domain OS=Nostoc flagelliforme CCNUN1 OX=2038116 GN=COO91_00321 PE=4 SV=1;tr|A0A2K8T9J8|A0A2K8T9J8_9NOSO Transposase IS4 family protein OS=Nostoc flagelliforme CCNUN1 OX=2038116 GN=COO91	198	24.457	24.457	VK(0.996)NLGEDIGSSADELGEGVVK(0.004)GTQR	VK(24)NLGEDIGSSADELGEGVVK(-24)GTQR	2	3	-0.78272
A0A2K8SUP8	12	K	Uncharacterized protein	COO91_05163	8.5276	tr|A0A2K8SHH5|A0A2K8SHH5_9NOSO Mobile element protein OS=Nostoc flagelliforme CCNUN1 OX=2038116 GN=COO91_00743 PE=4 SV=1;tr|E7DQ35|E7DQ35_9NOSO Putative transposase OS=Nostoc flagelliforme str. Sunitezuoqi OX=676037 GN=Nfla_7002 PE=4 SV=1	75	11.957	11.957	MVRLDNQTGSGK(0.5)K(0.5)	MVRLDNQTGSGK(0)K(0)	12	4	-3.5267
A0A2K8SUP8	13	K	Uncharacterized protein	COO91_05163	8.5276	tr|A0A2K8SHV3|A0A2K8SHV3_9NOSO Uncharacterized protein OS=Nostoc flagelliforme CCNUN1 OX=2038116 GN=COO91_00255 PE=4 SV=1	75	11.957	11.957	MVRLDNQTGSGK(0.5)K(0.5)	MVRLDNQTGSGK(0)K(0)	13	4	-3.5267
A0A2K8SUU1	117	K	Periplasmic protein refolding chaperone Spy/CpxP family	COO91_05216	19.239	tr|A0A2K8SI26|A0A2K8SI26_9NOSO MsmX, multiple sugar transport system ATP-binding protein OS=Nostoc flagelliforme CCNUN1 OX=2038116 GN=COO91_00765 PE=4 SV=1	173	32.759	32.759	RGK(0.999)GGYADLNLSEAQK(0.001)	RGK(33)GGYADLNLSEAQK(-33)	3	3	4.0249
A0A2K8SUV5	114	K	Uncaracterized surface protein containing fasciclin	COO91_05233	60.311	tr|A0A2K8SIL4|A0A2K8SIL4_9NOSO Ca2+-binding protein, RTX toxin-related OS=Nostoc flagelliforme CCNUN1 OX=2038116 GN=COO91_00982 PE=4 SV=1	577	74.524	74.524	AEFAALIQK(1)AFPNQNR	AEFAALIQK(75)AFPNQNR	9	2	0.33478
A0A2K8SUW3	276	K	4-amino-4-deoxy-L-arabinose transferase or related glycosyltransferase of PMT family	COO91_05190	63.615	tr|A0A2K8SIM9|A0A2K8SIM9_9NOSO Stress response protein YsnF OS=Nostoc flagelliforme CCNUN1 OX=2038116 GN=COO91_00524 PE=4 SV=1	552	92.677	63.301	LFYLWNLLLK(1)	LFYLWNLLLK(63)	10	2	2.375
A0A2K8SUY3	82	K	Uncharacterized protein	COO91_05263	31.009	tr|A0A2K8SIM9|A0A2K8SIM9_9NOSO Stress response protein YsnF OS=Nostoc flagelliforme CCNUN1 OX=2038116 GN=COO91_00524 PE=4 SV=1	287	20.734	20.734	EGADVAILYLNEHDDAK(0.399)ETK(0.301)HLVEK(0.301)	EGADVAILYLNEHDDAK(1.2)ETK(-1.2)HLVEK(-1.2)	17	3	-0.31719
A0A2K8SUY3	5	K	Uncharacterized protein	COO91_05263	31.009	tr|A0A2K8SIM9|A0A2K8SIM9_9NOSO Stress response protein YsnF OS=Nostoc flagelliforme CCNUN1 OX=2038116 GN=COO91_00524 PE=4 SV=1	287	46.278	46.278	AESK(1)EQTLQPPQQQEAPGVESEMTPKPK	AESK(46)EQTLQPPQQQEAPGVESEMTPK(-46)PK(-46)	4	3	-1.2111
A0A2K8SUY3	184	K	Uncharacterized protein	COO91_05263	31.009	tr|A0A2K8SIM9|A0A2K8SIM9_9NOSO Stress response protein YsnF OS=Nostoc flagelliforme CCNUN1 OX=2038116 GN=COO91_00524 PE=4 SV=1	287	74.485	74.485	HLQAGSSIVNTTSVTAYK(1)GSPQLLDYSSTK	HLQAGSSIVNTTSVTAYK(56)GSPQLLDYSSTK(-56)	18	3	-1.7747
A0A2K8SUY3	238	K	Uncharacterized protein	COO91_05263	31.009	tr|A0A2K8SIV5|A0A2K8SIV5_9NOSO ABC.CD.TX, HlyD family secretion protein OS=Nostoc flagelliforme CCNUN1 OX=2038116 GN=COO91_01286 PE=4 SV=1	287	58.061	58.061	VNAVAPGPIWTPLIPSTFPEEK(0.868)VETFGK(0.132)	VNAVAPGPIWTPLIPSTFPEEK(8.2)VETFGK(-8.2)	22	3	1.4369
A0A2K8SUZ5	253	K	ModA, molybdate transport system substrate-binding protein	COO91_05220	28.212	tr|A0A2K8SIV5|A0A2K8SIV5_9NOSO ABC.CD.TX, HlyD family secretion protein OS=Nostoc flagelliforme CCNUN1 OX=2038116 GN=COO91_01286 PE=4 SV=1	264	67.548	55.754	QFVQFLSGSQAK(1)TVLR	QFVQFLSGSQAK(56)TVLR	12	2	-0.28823
A0A2K8SUZ5	241	K	ModA, molybdate transport system substrate-binding protein	COO91_05220	28.212	tr|A0A2K8SJ12|A0A2K8SJ12_9NOSO Transposase OS=Nostoc flagelliforme CCNUN1 OX=2038116 GN=COO91_01346 PE=4 SV=1	264	76.563	76.563	NISAAK(1)QFVQFLSGSQAK	NISAAK(70)QFVQFLSGSQAK(-70)	6	2	1.1873
A0A2K8SVE1	565	K	N-acetylmuramoyl-L-alanine amidase	COO91_05410	67.313	tr|A0A2K8SJ95|A0A2K8SJ95_9NOSO DNA helicase OS=Nostoc flagelliforme CCNUN1 OX=2038116 GN=COO91_00735 PE=4 SV=1	624	66.664	66.664	NSILQNIPTIK(1)DR	NSILQNIPTIK(67)DR	11	2	-0.55359
A0A2K8SVG6	299	K	Ketol-acid reductoisomerase (NADP(+))	ilvC	35.89	tr|A0A2K8SJA3|A0A2K8SJA3_9NOSO Uncharacterized protein OS=Nostoc flagelliforme CCNUN1 OX=2038116 GN=COO91_01442 PE=4 SV=1	331	61.042	61.042	EFVLENQSGK(1)PGFTAMR	EFVLENQSGK(61)PGFTAMR	10	2	0.6793
A0A2K8SVH2	19	K	Single-stranded DNA-binding protein	COO91_05405	13.31	tr|A0A2K8SJC1|A0A2K8SJC1_9NOSO SIG2, RNA polymerase ssential primary-like sigma factor OS=Nostoc flagelliforme CCNUN1 OX=2038116 GN=COO91_01464 PE=4 SV=1	120	59.67	59.67	VGSDPDIK(0.992)YFESGSVK(0.008)	VGSDPDIK(21)YFESGSVK(-21)	8	2	-0.032867
A0A2K8SVM1	79	K	NifZ, nitrogen fixation protein NifZ	COO91_05478	10.641	tr|A0A2K8SJU5|A0A2K8SJU5_9NOSO Ketosteroid isomerase-related protein OS=Nostoc flagelliforme CCNUN1 OX=2038116 GN=COO91_01619 PE=3 SV=1	95	57.042	22.039	K(0.332)K(0.668)ELESVEESHESNATHE	K(-3)K(3)ELESVEESHESNATHE	2	3	-1.5245
A0A2K8SVM1	78	K	NifZ, nitrogen fixation protein NifZ	COO91_05478	10.641	tr|A0A2K8SK78|A0A2K8SK78_9NOSO Uncharacterized protein OS=Nostoc flagelliforme CCNUN1 OX=2038116 GN=COO91_01757 PE=4 SV=1	95	57.042	26.682	K(0.5)K(0.5)ELESVEESHESNATHE	K(0)K(0)ELESVEESHESNATHE	1	3	0.08948
A0A2K8SVS4	109	K	Cyanophycinase	COO91_05427	29.942	tr|A0A2K8SK99|A0A2K8SK99_9NOSO Coenzyme A biosynthesis bifunctional protein CoaBC OS=Nostoc flagelliforme CCNUN1 OX=2038116 GN=coaBC PE=3 SV=1	279	29.115	29.115	ITNILK(1)GTEIDTAIHQR	ITNILK(29)GTEIDTAIHQR	6	3	-0.30943
A0A2K8SVS4	18	K	Cyanophycinase	COO91_05427	29.942	tr|A0A2K8SKF6|A0A2K8SKF6_9NOSO Uncharacterized protein OS=Nostoc flagelliforme CCNUN1 OX=2038116 GN=COO91_01790 PE=4 SV=1	279	35.45	35.45	QLVIIGGAEDK(1)EGDCQILR	QLVIIGGAEDK(35)EGDCQILR	11	2	-1.0831
A0A2K8SW52	13	K	Uncharacterized protein	COO91_05687	4.5574	tr|A0A2K8SKT7|A0A2K8SKT7_9NOSO Non-ribosomal peptide synthetase component F OS=Nostoc flagelliforme CCNUN1 OX=2038116 GN=COO91_01950 PE=4 SV=1	37	10.326	10.326	MLGK(0.218)ITCFFVNSK(0.644)VSIAEK(0.138)	MLGK(-4.7)ITCFFVNSK(4.7)VSIAEK(-6.7)	13	2	-1.7044
A0A2K8SW68	39	K	BCP, peroxiredoxin Q/BCP	COO91_05709	15.368	tr|A0A2K8SLB0|A0A2K8SLB0_9NOSO CpcB, phycocyanin beta chain OS=Nostoc flagelliforme CCNUN1 OX=2038116 GN=COO91_01515 PE=3 SV=1;tr|D4NZI2|D4NZI2_9NOSO C-phycocyanin beta subunit OS=Nostoc flagelliforme NX-09 OX=744871 PE=3 SV=1	145	62.398	62.398	TVVLYFYPK(0.998)DDTPGCTK(0.002)	TVVLYFYPK(28)DDTPGCTK(-28)	9	2	-0.22243
A0A2K8SW68	47	K	BCP, peroxiredoxin Q/BCP	COO91_05709	15.368	tr|A0A2K8SLC8|A0A2K8SLC8_9NOSO Alkylated DNA nucleotide flippase Atl1 OS=Nostoc flagelliforme CCNUN1 OX=2038116 GN=COO91_02177 PE=4 SV=1	145	36.053	36.053	TVVLYFYPK(0.178)DDTPGCTK(0.822)QACSFR	TVVLYFYPK(-6.6)DDTPGCTK(6.6)QACSFR	17	3	-2.2886
A0A2K8SWI0	18	K	Uncharacterized protein	COO91_05809	11.919	tr|A0A2K8SLQ3|A0A2K8SLQ3_9NOSO 60 kDa chaperonin OS=Nostoc flagelliforme CCNUN1 OX=2038116 GN=groL PE=3 SV=1	108	12.683	12.683	TLK(1)ELEQQLLALSPGEK(1)	TLK(13)ELEQQLLALSPGEK(13)	17	2	4.9136
A0A2K8SWI0	4	K	Uncharacterized protein	COO91_05809	11.919	tr|A0A2K8SLQ3|A0A2K8SLQ3_9NOSO 60 kDa chaperonin OS=Nostoc flagelliforme CCNUN1 OX=2038116 GN=groL PE=3 SV=1	108	12.683	12.683	TLK(1)ELEQQLLALSPGEK(1)	TLK(13)ELEQQLLALSPGEK(13)	3	2	4.9136
A0A2K8SWI8	236	K	Archaeal aspartate aminotransferase	COO91_05812	41.537	tr|A0A2K8SLS5|A0A2K8SLS5_9NOSO 60 kDa chaperonin OS=Nostoc flagelliforme CCNUN1 OX=2038116 GN=groL PE=3 SV=1;tr|B2ZWU2|B2ZWU2_9NOSO 60 kDa chaperonin (Fragment) OS=Nostoc flagelliforme MAC OX=450201 GN=groEL PE=3 SV=1	384	73.805	23.381	ATAK(1)NTTPFTPPVNLIVALHTTLR	ATAK(23)NTTPFTPPVNLIVALHTTLR	4	3	2.4705
A0A2K8SWI8	232	K	Archaeal aspartate aminotransferase	COO91_05812	41.537	tr|A0A2K8SLS5|A0A2K8SLS5_9NOSO 60 kDa chaperonin OS=Nostoc flagelliforme CCNUN1 OX=2038116 GN=groL PE=3 SV=1;tr|B2ZWU2|B2ZWU2_9NOSO 60 kDa chaperonin (Fragment) OS=Nostoc flagelliforme MAC OX=450201 GN=groEL PE=3 SV=1	384	15.955	15.955	K(0.5)ATAK(0.5)NTTPFTPPVNLIVALHTTLR	K(0)ATAK(0)NTTPFTPPVNLIVALHTTLR	1	4	-0.126
A0A2K8SWI8	311	K	Archaeal aspartate aminotransferase	COO91_05812	41.537	tr|A0A2K8SM92|A0A2K8SM92_9NOSO 10 kDa chaperonin OS=Nostoc flagelliforme CCNUN1 OX=2038116 GN=groS PE=3 SV=1	384	15.165	15.165	AAIQGLNLPLFAADSSASPAITAVAPQGIESDK(1)IR	AAIQGLNLPLFAADSSASPAITAVAPQGIESDK(15)IR	33	3	1.6665
A0A2K8SWP7	54	K	Glycine/D-amino acid oxidase	COO91_05861	39.934	tr|A0A2K8SM92|A0A2K8SM92_9NOSO 10 kDa chaperonin OS=Nostoc flagelliforme CCNUN1 OX=2038116 GN=groS PE=3 SV=1	371	47.844	47.844	QAPAQASTGAALGVLMGAISQK(0.5)IK(0.5)	QAPAQASTGAALGVLMGAISQK(0)IK(0)	22	3	0.08029
A0A2K8SWP7	56	K	Glycine/D-amino acid oxidase	COO91_05861	39.934	tr|A0A2K8SMW9|A0A2K8SMW9_9NOSO Nitrous oxidase accessory protein NosD, containings tandem CASH domains OS=Nostoc flagelliforme CCNUN1 OX=2038116 GN=COO91_02696 PE=4 SV=1	371	47.844	47.844	QAPAQASTGAALGVLMGAISQK(0.5)IK(0.5)	QAPAQASTGAALGVLMGAISQK(0)IK(0)	24	3	0.08029
A0A2K8SWQ6	5	K	Uncharacterized protein	COO91_05888	6.0274	tr|A0A2K8SN84|A0A2K8SN84_9NOSO Bifunctional DNA-binding transcriptional regulator of stationary OS=Nostoc flagelliforme CCNUN1 OX=2038116 GN=COO91_02873 PE=4 SV=1	54	7.1505	7.1505	MLK(0.549)IK(0.549)LIVGVK(0.902)	MLK(0)IK(0)LIVGVK(6.6)	5	3	7.7821
A0A2K8SWQ6	3	K	Uncharacterized protein	COO91_05888	6.0274	tr|A0A2K8SN84|A0A2K8SN84_9NOSO Bifunctional DNA-binding transcriptional regulator of stationary OS=Nostoc flagelliforme CCNUN1 OX=2038116 GN=COO91_02873 PE=4 SV=1	54	7.1505	7.1505	MLK(0.549)IK(0.549)LIVGVK(0.902)	MLK(0)IK(0)LIVGVK(6.6)	3	3	7.7821
A0A2K8SWQ6	11	K	Uncharacterized protein	COO91_05888	6.0274	tr|A0A2K8SNU4|A0A2K8SNU4_9NOSO TrxA, thioredoxin 1 OS=Nostoc flagelliforme CCNUN1 OX=2038116 GN=COO91_03019 PE=4 SV=1	54	7.1505	7.1505	MLK(0.549)IK(0.549)LIVGVK(0.902)	MLK(0)IK(0)LIVGVK(6.6)	11	3	7.7821
A0A2K8SWW8	108	K	Methylase of polypeptide chain release factors	COO91_05921	24.07	tr|A0A2K8SNU7|A0A2K8SNU7_9NOSO Nitrous oxidase accessory protein NosD, containings tandem CASH domains OS=Nostoc flagelliforme CCNUN1 OX=2038116 GN=COO91_02430 PE=4 SV=1	220	72.075	55.866	IVNTAAQK(1)FGTQGFGIDIDPQR	IVNTAAQK(56)FGTQGFGIDIDPQR	8	2	-0.26282
A0A2K8SX07	202	K	Ribulose bisphosphate carboxylase large chain	cbbL	53.103	tr|A0A2K8SPC1|A0A2K8SPC1_9NOSO Prokaryotic membrane lipoprotein lipid attachment site profile OS=Nostoc flagelliforme CCNUN1 OX=2038116 GN=COO91_03195 PE=4 SV=1	476	94.507	69.327	GGLDFTK(1)DDENINSAPFQR	GGLDFTK(69)DDENINSAPFQR	7	2	-0.55243
A0A2K8SX07	451	K	Ribulose bisphosphate carboxylase large chain	cbbL	53.103	tr|A0A2K8SQ37|A0A2K8SQ37_9NOSO YlqD protein OS=Nostoc flagelliforme CCNUN1 OX=2038116 GN=COO91_02844 PE=4 SV=1	476	34.338	34.338	EAAK(1)WSPELAVACELWK	EAAK(34)WSPELAVACELWK(-34)	4	2	1.6415
A0A2K8SX07	7	K	Ribulose bisphosphate carboxylase large chain	cbbL	53.103	tr|A0A2K8SQ60|A0A2K8SQ60_9NOSO Uncharacterized protein OS=Nostoc flagelliforme CCNUN1 OX=2038116 GN=COO91_03425 PE=4 SV=1	476	57.032	57.032	SYAQTK(1)TQSK	SYAQTK(34)TQSK(-34)	6	2	-0.45781
A0A2K8SX07	11	K	Ribulose bisphosphate carboxylase large chain	cbbL	53.103	tr|A0A2K8SQH8|A0A2K8SQH8_9NOSO Alkaline phosphatase OS=Nostoc flagelliforme CCNUN1 OX=2038116 GN=COO91_03627 PE=4 SV=1	476	108.2	108.2	TQSK(1)SGYQAGVKDYR	TQSK(99)SGYQAGVK(-99)DYR	4	3	-0.5565
A0A2K8SX07	176	K	Ribulose bisphosphate carboxylase large chain	cbbL	53.103	tr|A0A2K8SQH8|A0A2K8SQH8_9NOSO Alkaline phosphatase OS=Nostoc flagelliforme CCNUN1 OX=2038116 GN=COO91_03627 PE=4 SV=1	476	94.804	68.49	YGRPLLGCTIK(0.961)PK(0.039)	YGRPLLGCTIK(14)PK(-14)	11	3	0.39398
A0A2K8SX07	335	K	Ribulose bisphosphate carboxylase large chain	cbbL	53.103	tr|A0A2K8SQH8|A0A2K8SQH8_9NOSO Alkaline phosphatase OS=Nostoc flagelliforme CCNUN1 OX=2038116 GN=COO91_03627 PE=4 SV=1	476	46.768	38.839	LSGGDHIHTGTVVGK(1)LEGER	LSGGDHIHTGTVVGK(39)LEGER	15	4	-0.7567
A0A2K8SX07	306	K	Ribulose bisphosphate carboxylase large chain	cbbL	53.103	tr|A0A2K8SQH8|A0A2K8SQH8_9NOSO Alkaline phosphatase OS=Nostoc flagelliforme CCNUN1 OX=2038116 GN=COO91_03627 PE=4 SV=1	476	53.679	53.679	QK(1)NHGIHFR	QK(54)NHGIHFR	2	3	-0.99141
A0A2K8SX07	253	K	Ribulose bisphosphate carboxylase large chain	cbbL	53.103	tr|A0A2K8SQH8|A0A2K8SQH8_9NOSO Alkaline phosphatase OS=Nostoc flagelliforme CCNUN1 OX=2038116 GN=COO91_03627 PE=4 SV=1	476	35.845	35.845	GHYLNVTAPTCEEMLK(1)R	GHYLNVTAPTCEEMLK(36)R	16	3	2.0241
A0A2K8SX21	64	K	RbcS, ribulose-bisphosphate carboxylase small chain	COO91_05983	13.125	tr|A0A2K8SQH8|A0A2K8SQH8_9NOSO Alkaline phosphatase OS=Nostoc flagelliforme CCNUN1 OX=2038116 GN=COO91_03627 PE=4 SV=1	112	35.246	35.246	LPLFGAK(1)STQEVLSEVQGCR	LPLFGAK(35)STQEVLSEVQGCR	7	3	0.62601
A0A2K8SX59	126	K	Rhodanese-related sulfurtransferase	COO91_06019	22.174	tr|A0A2K8SQH8|A0A2K8SQH8_9NOSO Alkaline phosphatase OS=Nostoc flagelliforme CCNUN1 OX=2038116 GN=COO91_03627 PE=4 SV=1	207	46.276	15.78	AIGGPTEGIIESK(1)TPPGPDDYNVVDR	AIGGPTEGIIESK(16)TPPGPDDYNVVDR	13	3	-1.6872
A0A2K8SXG1	107	K	Chaperone protein DnaK	dnaK	67.868	tr|A0A2K8SQH8|A0A2K8SQH8_9NOSO Alkaline phosphatase OS=Nostoc flagelliforme CCNUN1 OX=2038116 GN=COO91_03627 PE=4 SV=1	634	30.862	30.862	LDCPIAGK(0.995)PFAPEEISAK(0.005)	LDCPIAGK(23)PFAPEEISAK(-23)	8	2	-0.17406
A0A2K8SXG1	90	K	Chaperone protein DnaK	dnaK	67.868	tr|A0A2K8SQK3|A0A2K8SQK3_9NOSO Carbonic anhydrase or acetyltransferase, isoleucine patch superfamily OS=Nostoc flagelliforme CCNUN1 OX=2038116 GN=COO91_03664 PE=4 SV=1	634	26.21	26.21	RYEEVSNEATEVSYK(1)VLSSNGNVK(1)	RYEEVSNEATEVSYK(26)VLSSNGNVK(26)	15	4	-1.4176
A0A2K8SXG1	99	K	Chaperone protein DnaK	dnaK	67.868	tr|A0A2K8SQK3|A0A2K8SQK3_9NOSO Carbonic anhydrase or acetyltransferase, isoleucine patch superfamily OS=Nostoc flagelliforme CCNUN1 OX=2038116 GN=COO91_03664 PE=4 SV=1	634	32.375	26.21	RYEEVSNEATEVSYK(1)VLSSNGNVK(1)	RYEEVSNEATEVSYK(26)VLSSNGNVK(26)	24	4	-1.4176
A0A2K8SXI3	126	K	Glyceraldehyde-3-phosphate dehydrogenase	COO91_05459	36.643	tr|A0A2K8SQK3|A0A2K8SQK3_9NOSO Carbonic anhydrase or acetyltransferase, isoleucine patch superfamily OS=Nostoc flagelliforme CCNUN1 OX=2038116 GN=COO91_03664 PE=4 SV=1	337	38.656	38.656	VLITAPGK(1)NEDGTFVVGVNHHDYDHNK	VLITAPGK(38)NEDGTFVVGVNHHDYDHNK(-38)	8	4	1.621
A0A2K8SXI3	216	K	Glyceraldehyde-3-phosphate dehydrogenase	COO91_05459	36.643	tr|A0A2K8SQK3|A0A2K8SQK3_9NOSO Carbonic anhydrase or acetyltransferase, isoleucine patch superfamily OS=Nostoc flagelliforme CCNUN1 OX=2038116 GN=COO91_03664 PE=4 SV=1	337	108.94	108.94	AAAINIVPTSTGAAK(1)AVALVIPDLK	AAAINIVPTSTGAAK(52)AVALVIPDLK(-52)	15	3	-0.054233
A0A2K8SXJ0	5	K	AROA2, 3-deoxy-7-phosphoheptulonate synthase	COO91_06163	33.759	tr|A0A2K8SQK3|A0A2K8SQK3_9NOSO Carbonic anhydrase or acetyltransferase, isoleucine patch superfamily OS=Nostoc flagelliforme CCNUN1 OX=2038116 GN=COO91_03664 PE=4 SV=1	318	42.941	42.941	INAK(1)LAAQSHPNHQTIVK	INAK(39)LAAQSHPNHQTIVK(-39)	4	2	6.5967
A0A2K8SXM2	158	K	PpgK, polyphosphate glucokinase	COO91_06204	25.857	tr|A0A2K8SQR2|A0A2K8SQR2_9NOSO Putative transposase YbfD/YdcC associated with H repeats OS=Nostoc flagelliforme CCNUN1 OX=2038116 GN=COO91_03710 PE=4 SV=1	238	92.732	57.032	K(1)GETFEQQLGR	K(57)GETFEQQLGR	1	2	-0.66394
A0A2K8SY00	144	K	Inorganic pyrophosphatase	ppa	19.188	tr|A0A2K8SQU3|A0A2K8SQU3_9NOSO ApcB, allophycocyanin beta subunit OS=Nostoc flagelliforme CCNUN1 OX=2038116 GN=COO91_03781 PE=3 SV=1	170	24.832	24.832	K(0.993)VTEILGWQDVDK(0.003)VAALVEK(0.003)	K(25)VTEILGWQDVDK(-25)VAALVEK(-25)	1	3	-1.9195
A0A2K8SY16	86	K	Uncaracterized surface protein containing fasciclin	COO91_06350	13.507	tr|A0A2K8SQU3|A0A2K8SQU3_9NOSO ApcB, allophycocyanin beta subunit OS=Nostoc flagelliforme CCNUN1 OX=2038116 GN=COO91_03781 PE=3 SV=1	133	110.58	110.58	LK(1)TATTVEGSDVK	LK(110)TATTVEGSDVK(-110)	2	2	-0.60655
A0A2K8SY16	76	K	Uncaracterized surface protein containing fasciclin	COO91_06350	13.507	tr|A0A2K8SQV6|A0A2K8SQV6_9NOSO Ribose-5-phosphate isomerase A OS=Nostoc flagelliforme CCNUN1 OX=2038116 GN=rpiA PE=3 SV=1	133	54.199	45.183	ILTYHVVSGK(1)VLAADVVK	ILTYHVVSGK(34)VLAADVVK(-34)	10	3	0.82686
A0A2K8SY16	97	K	Uncaracterized surface protein containing fasciclin	COO91_06350	13.507	tr|A0A2K8SQV6|A0A2K8SQV6_9NOSO Ribose-5-phosphate isomerase A OS=Nostoc flagelliforme CCNUN1 OX=2038116 GN=rpiA PE=3 SV=1	133	112.95	109.47	TATTVEGSDVK(1)IDASNGVK	TATTVEGSDVK(63)IDASNGVK(-63)	11	2	-2.7677
A0A2K8SY35	174	K	Dps, starvation-inducible DNA-binding protein	COO91_06272	20.011	tr|A0A2K8SQV6|A0A2K8SQV6_9NOSO Ribose-5-phosphate isomerase A OS=Nostoc flagelliforme CCNUN1 OX=2038116 GN=rpiA PE=3 SV=1	179	93.026	56.943	SFIEGEALGPDGRQPAEGAK(1)TPVGV	SFIEGEALGPDGRQPAEGAK(57)TPVGV	20	3	3.3938
A0A2K8SY35	92	K	Dps, starvation-inducible DNA-binding protein	COO91_06272	20.011	tr|A0A2K8SQW3|A0A2K8SQW3_9NOSO FAD/FMN-containing dehydrogenase OS=Nostoc flagelliforme CCNUN1 OX=2038116 GN=COO91_03143 PE=4 SV=1	179	52.195	52.195	IASLK(1)EHAGNVPTATGMVSNLVNDHEQVIR	IASLK(52)EHAGNVPTATGMVSNLVNDHEQVIR	5	4	1.0455
A0A2K8SY35	36	K	Dps, starvation-inducible DNA-binding protein	COO91_06272	20.011	tr|A0A2K8SR02|A0A2K8SR02_9NOSO ApcA, allophycocyanin alpha subunit OS=Nostoc flagelliforme CCNUN1 OX=2038116 GN=COO91_03780 PE=3 SV=1	179	53.517	53.517	K(1)YHWDVVGPQFR	K(54)YHWDVVGPQFR	1	3	0.6451
A0A2K8SYI6	56	K	ParM, plasmid segregation protein ParM	COO91_06526	41.452	tr|A0A2K8SR02|A0A2K8SR02_9NOSO ApcA, allophycocyanin alpha subunit OS=Nostoc flagelliforme CCNUN1 OX=2038116 GN=COO91_03780 PE=3 SV=1	384	47.844	47.844	TSTK(1)TCVSREPGNVVFVPANVK	TSTK(48)TCVSREPGNVVFVPANVK(-48)	4	3	1.4185
A0A2K8SYI6	36	K	ParM, plasmid segregation protein ParM	COO91_06526	41.452	tr|A0A2K8SR02|A0A2K8SR02_9NOSO ApcA, allophycocyanin alpha subunit OS=Nostoc flagelliforme CCNUN1 OX=2038116 GN=COO91_03780 PE=3 SV=1	384	51.07	51.07	VSASTPINAVNNTPPK(0.995)TGGVPGK(0.005)	VSASTPINAVNNTPPK(23)TGGVPGK(-23)	16	2	-0.41068
A0A2K8SYJ0	94	K	ATP synthase subunit beta	atpD	51.858	tr|A0A2K8SR31|A0A2K8SR31_9NOSO Hemerythrin superfamily protein OS=Nostoc flagelliforme CCNUN1 OX=2038116 GN=COO91_03810 PE=4 SV=1	482	97.949	69.201	GFEVTDTGAPITVPVGK(1)ATLGR	GFEVTDTGAPITVPVGK(69)ATLGR	17	2	-0.92659
A0A2K8SYJ0	135	K	ATP synthase subunit beta	atpD	51.858	tr|A0A2K8SR31|A0A2K8SR31_9NOSO Hemerythrin superfamily protein OS=Nostoc flagelliforme CCNUN1 OX=2038116 GN=COO91_03810 PE=4 SV=1	482	72.327	72.327	FTDLETK(1)PSVFETGIK	FTDLETK(53)PSVFETGIK(-53)	7	2	-0.7392
A0A2K8SYM7	17	K	Uncharacterized protein	COO91_06468	15.709	tr|A0A2K8SR31|A0A2K8SR31_9NOSO Hemerythrin superfamily protein OS=Nostoc flagelliforme CCNUN1 OX=2038116 GN=COO91_03810 PE=4 SV=1	136	28.228	12.683	TWTSQK(1)YHTIMAIMAIK(1)	TWTSQK(13)YHTIMAIMAIK(13)	6	3	5.8743
A0A2K8SYM7	28	K	Uncharacterized protein	COO91_06468	15.709	tr|A0A2K8SR31|A0A2K8SR31_9NOSO Hemerythrin superfamily protein OS=Nostoc flagelliforme CCNUN1 OX=2038116 GN=COO91_03810 PE=4 SV=1	136	28.228	12.683	TWTSQK(1)YHTIMAIMAIK(1)	TWTSQK(13)YHTIMAIMAIK(13)	17	3	5.8743
A0A2K8SYR6	135	K	30S ribosomal protein S5	rpsE	18.416	tr|A0A2K8SR31|A0A2K8SR31_9NOSO Hemerythrin superfamily protein OS=Nostoc flagelliforme CCNUN1 OX=2038116 GN=COO91_03810 PE=4 SV=1	175	50.314	27.357	NVLAK(1)QLGSNNPLNNAR	NVLAK(27)QLGSNNPLNNAR	5	2	-0.40107
A0A2K8SYZ8	368	K	Transketolase	COO91_06695	72.577	tr|A0A2K8SR47|A0A2K8SR47_9NOSO Putative secreted protein OS=Nostoc flagelliforme CCNUN1 OX=2038116 GN=COO91_03849 PE=4 SV=1	675	29.102	29.102	K(0.999)HSETCLNK(0.001)	K(29)HSETCLNK(-29)	1	3	1.0849
A0A2K8SYZ8	9	K	Transketolase	COO91_06695	72.577	tr|A0A2K8SR82|A0A2K8SR82_9NOSO Tetratricopeptide OS=Nostoc flagelliforme CCNUN1 OX=2038116 GN=COO91_03926 PE=4 SV=1	675	52.662	31.905	TVATQSAK(1)ELSVEELAINSIR	TVATQSAK(32)ELSVEELAINSIR	8	3	2.1432
A0A2K8SZ44	130	K	L-asparaginase	COO91_06642	34.96	tr|A0A2K8SRA5|A0A2K8SRA5_9NOSO Acetylornithine aminotransferase OS=Nostoc flagelliforme CCNUN1 OX=2038116 GN=argD PE=3 SV=1	317	34.338	34.338	HSPLEYNCSGK(1)HAGMLAVCQQR	HSPLEYNCSGK(34)HAGMLAVCQQR	11	4	1.6668
A0A2K8SZ44	57	K	L-asparaginase	COO91_06642	34.96	tr|A0A2K8SRM6|A0A2K8SRM6_9NOSO Recombinational DNA repair protein RecT OS=Nostoc flagelliforme CCNUN1 OX=2038116 GN=COO91_03410 PE=4 SV=1	317	39.587	22.456	SALK(1)PFQALAVTTTGTLER	SALK(22)PFQALAVTTTGTLER	4	2	-0.04686
A0A2K8SZ70	49	K	N-acetylmuramoyl-L-alanine amidase	COO91_06767	33.816	tr|A0A2K8SRR1|A0A2K8SRR1_9NOSO Uncharacterized protein OS=Nostoc flagelliforme CCNUN1 OX=2038116 GN=COO91_04101 PE=4 SV=1	313	44.571	23.432	ALGNEVVVCK(1)PSSASTVR	ALGNEVVVCK(23)PSSASTVR	10	2	-2.5828
A0A2K8SZC9	151	K	Bifunctional protein PyrR	pyrR	21.003	tr|A0A2K8SS44|A0A2K8SS44_9NOSO PhoD, alkaline phosphatase D OS=Nostoc flagelliforme CCNUN1 OX=2038116 GN=COO91_04108 PE=4 SV=1	189	63.397	63.397	K(1)LPTAKEEVVK	K(45)LPTAK(-45)EEVVK(-63)	1	3	0.17901
A0A2K8SZD5	35	K	Photosystem I iron-sulfur center	psaC	8.8302	tr|A0A2K8SS44|A0A2K8SS44_9NOSO PhoD, alkaline phosphatase D OS=Nostoc flagelliforme CCNUN1 OX=2038116 GN=COO91_04108 PE=4 SV=1	81	23.983	23.983	ACPTDVLEMVPWDGCK(1)AAQIASSPR	ACPTDVLEMVPWDGCK(24)AAQIASSPR	16	3	2.5042
A0A2K8SZD5	6	K	Photosystem I iron-sulfur center	psaC	8.8302	tr|A0A2K8SS44|A0A2K8SS44_9NOSO PhoD, alkaline phosphatase D OS=Nostoc flagelliforme CCNUN1 OX=2038116 GN=COO91_04108 PE=4 SV=1	81	91.032	54.556	SHTVK(1)IYDTCIGCTQCVR	SHTVK(55)IYDTCIGCTQCVR	5	3	-0.21393
A0A2K8SZF4	23	K	Carboxypeptidase C	COO91_06766	15.959	tr|A0A2K8SS44|A0A2K8SS44_9NOSO PhoD, alkaline phosphatase D OS=Nostoc flagelliforme CCNUN1 OX=2038116 GN=COO91_04108 PE=4 SV=1	136	12.183	12.183	MFVEIYK(0.119)SDTTILPVYGSIHFWK(0.941)K(0.941)	MFVEIYK(-12)SDTTILPVYGSIHFWK(12)K(12)	23	4	2.8856
A0A2K8SZF4	24	K	Carboxypeptidase C	COO91_06766	15.959	tr|A0A2K8SS57|A0A2K8SS57_9NOSO Phosphate-binding protein OS=Nostoc flagelliforme CCNUN1 OX=2038116 GN=COO91_04193 PE=3 SV=1	136	12.183	12.183	MFVEIYK(0.119)SDTTILPVYGSIHFWK(0.941)K(0.941)	MFVEIYK(-12)SDTTILPVYGSIHFWK(12)K(12)	24	4	2.8856
A0A2K8SZM7	325	K	Ca2+-binding protein, RTX toxin-related	COO91_06932	48.705	tr|A0A2K8SS57|A0A2K8SS57_9NOSO Phosphate-binding protein OS=Nostoc flagelliforme CCNUN1 OX=2038116 GN=COO91_04193 PE=3 SV=1	465	29.664	29.664	DILIGNK(0.998)GNDYLQGDSGDDFLK(0.002)	DILIGNK(28)GNDYLQGDSGDDFLK(-28)	7	2	-0.37832
A0A2K8SZM7	23	K	Ca2+-binding protein, RTX toxin-related	COO91_06932	48.705	tr|A0A2K8SS57|A0A2K8SS57_9NOSO Phosphate-binding protein OS=Nostoc flagelliforme CCNUN1 OX=2038116 GN=COO91_04193 PE=3 SV=1	465	108.2	108.2	DLTSSSNDDLGK(0.826)LK(0.174)	DLTSSSNDDLGK(6.8)LK(-6.8)	12	2	-0.2018
A0A2K8SZM7	372	K	Ca2+-binding protein, RTX toxin-related	COO91_06932	48.705	tr|A0A2K8SS57|A0A2K8SS57_9NOSO Phosphate-binding protein OS=Nostoc flagelliforme CCNUN1 OX=2038116 GN=COO91_04193 PE=3 SV=1	465	55.782	55.782	ELGVDIISDFNPK(0.704)QDK(0.283)IQLSK(0.012)	ELGVDIISDFNPK(4)QDK(-4)IQLSK(-18)	13	3	-0.37068
A0A2K8SZM7	375	K	Ca2+-binding protein, RTX toxin-related	COO91_06932	48.705	tr|A0A2K8SS87|A0A2K8SS87_9NOSO Uncharacterized protein OS=Nostoc flagelliforme CCNUN1 OX=2038116 GN=COO91_03621 PE=4 SV=1	465	30.862	30.862	ELGVDIISDFNPK(0.274)QDK(0.598)IQLSK(0.128)	ELGVDIISDFNPK(-3.4)QDK(3.4)IQLSK(-6.7)	16	3	-0.036308
A0A2K8SZM7	380	K	Ca2+-binding protein, RTX toxin-related	COO91_06932	48.705	tr|A0A2K8SS87|A0A2K8SS87_9NOSO Uncharacterized protein OS=Nostoc flagelliforme CCNUN1 OX=2038116 GN=COO91_03621 PE=4 SV=1	465	22.395	22.395	ELGVDIISDFNPK(0.333)QDK(0.333)IQLSK(0.333)	ELGVDIISDFNPK(0)QDK(0)IQLSK(0)	21	3	0.31659
A0A2K8SZM7	212	K	Ca2+-binding protein, RTX toxin-related	COO91_06932	48.705	tr|A0A2K8SSC2|A0A2K8SSC2_9NOSO NAD(P)H-quinone oxidoreductase subunit J OS=Nostoc flagelliforme CCNUN1 OX=2038116 GN=ndhJ PE=3 SV=1	465	110.9	110.9	GGVLTLGSK(1)SENLGDAIKEAVAR	GGVLTLGSK(55)SENLGDAIK(-55)EAVAR	9	3	0.65042
A0A2K8SZP2	2	K	P-loop containing nucleoside triphosphate hydrolase	COO91_06947	84.273	tr|A0A2K8SSF3|A0A2K8SSF3_9NOSO Cytochrome c peroxidase OS=Nostoc flagelliforme CCNUN1 OX=2038116 GN=COO91_03684 PE=3 SV=1	725	35.845	35.845	MK(1)RLLEALLDFANLEK(1)	MK(36)RLLEALLDFANLEK(36)	2	2	8.1568
A0A2K8SZP2	16	K	P-loop containing nucleoside triphosphate hydrolase	COO91_06947	84.273	tr|A0A2K8SSP1|A0A2K8SSP1_9NOSO Uncharacterized protein OS=Nostoc flagelliforme CCNUN1 OX=2038116 GN=COO91_04411 PE=4 SV=1	725	35.845	35.845	MK(1)RLLEALLDFANLEK(1)	MK(36)RLLEALLDFANLEK(36)	16	2	8.1568
A0A2K8SZP6	8	K	Uncharacterized protein	COO91_06852	32.352	tr|A0A2K8SSP1|A0A2K8SSP1_9NOSO Uncharacterized protein OS=Nostoc flagelliforme CCNUN1 OX=2038116 GN=COO91_04411 PE=4 SV=1	278	13.778	13.778	MTSATLIK(1)GQGRDR	MTSATLIK(14)GQGRDR	8	2	8.7454
A0A2K8SZR7	195	K	Nucleotide-binding universal stress protein, UspA family	COO91_06984	30.709	tr|A0A2K8SSS1|A0A2K8SSS1_9NOSO D-fructose 1,6-bisphosphatase class 2/sedoheptulose 1,7-bisphosphatase OS=Nostoc flagelliforme CCNUN1 OX=2038116 GN=COO91_04476 PE=3 SV=1	283	32.113	32.113	K(0.007)SEITEVSSDK(0.991)NPVLAAAVAEAK(0.002)	K(-22)SEITEVSSDK(22)NPVLAAAVAEAK(-27)	11	3	0.58416
A0A2K8SZR7	51	K	Nucleotide-binding universal stress protein, UspA family	COO91_06984	30.709	tr|A0A2K8SSS1|A0A2K8SSS1_9NOSO D-fructose 1,6-bisphosphatase class 2/sedoheptulose 1,7-bisphosphatase OS=Nostoc flagelliforme CCNUN1 OX=2038116 GN=COO91_04476 PE=3 SV=1	283	47.491	47.491	VTILHVVQAQNTAATMTAK(0.999)WENGGK(0.001)	VTILHVVQAQNTAATMTAK(29)WENGGK(-29)	19	3	-0.20236
A0A2K8SZS3	260	K	PPC domain-containing protein	COO91_06955	45.22	tr|A0A2K8SSS1|A0A2K8SSS1_9NOSO D-fructose 1,6-bisphosphatase class 2/sedoheptulose 1,7-bisphosphatase OS=Nostoc flagelliforme CCNUN1 OX=2038116 GN=COO91_04476 PE=3 SV=1	443	20.614	20.614	IELK(1)GPPQDYSLQVVGSNTR	IELK(21)GPPQDYSLQVVGSNTR	4	2	-1.3894
A0A2K8SZV9	306	K	FbaB, fructose-bisphosphate aldolase, class I	COO91_07008	39.529	tr|A0A2K8SSS1|A0A2K8SSS1_9NOSO D-fructose 1,6-bisphosphatase class 2/sedoheptulose 1,7-bisphosphatase OS=Nostoc flagelliforme CCNUN1 OX=2038116 GN=COO91_04476 PE=3 SV=1	360	76.009	47.27	VGLINSGGATGK(1)NDFAEAVR	VGLINSGGATGK(47)NDFAEAVR	12	2	-1.0951
A0A2K8T034	239	K	Phosphoglycerate kinase	pgk	42.477	tr|A0A2K8SSS1|A0A2K8SSS1_9NOSO D-fructose 1,6-bisphosphatase class 2/sedoheptulose 1,7-bisphosphatase OS=Nostoc flagelliforme CCNUN1 OX=2038116 GN=COO91_04476 PE=3 SV=1	400	37.146	37.146	GLNVGK(0.999)SLVEEDK(0.001)LELAK	GLNVGK(31)SLVEEDK(-31)LELAK(-36)	6	2	-1.0123
A0A2K8T034	205	K	Phosphoglycerate kinase	pgk	42.477	tr|A0A2K8SST9|A0A2K8SST9_9NOSO Glutaredoxin OS=Nostoc flagelliforme CCNUN1 OX=2038116 GN=COO91_04486 PE=3 SV=1	400	72.846	72.846	VSSK(1)IGVIETLLEK	VSSK(71)IGVIETLLEK(-71)	4	2	-0.47832
A0A2K8T090	389	K	Histidine kinase-like ATPase	COO91_07132	61.665	tr|A0A2K8SST9|A0A2K8SST9_9NOSO Glutaredoxin OS=Nostoc flagelliforme CCNUN1 OX=2038116 GN=COO91_04486 PE=3 SV=1	553	23.432	23.432	YMSK(0.01)LVDNMLLVNQFELEK(0.995)PK(0.995)	YMSK(-23)LVDNMLLVNQFELEK(23)PK(23)	19	3	1.0028
A0A2K8T090	391	K	Histidine kinase-like ATPase	COO91_07132	61.665	tr|A0A2K8ST67|A0A2K8ST67_9NOSO Photosystem I P700 chlorophyll a apoprotein A1 OS=Nostoc flagelliforme CCNUN1 OX=2038116 GN=psaA PE=3 SV=1	553	23.432	23.432	YMSK(0.01)LVDNMLLVNQFELEK(0.995)PK(0.995)	YMSK(-23)LVDNMLLVNQFELEK(23)PK(23)	21	3	1.0028
A0A2K8T0B5	85	K	Murein DD-endopeptidase MepM and murein hydrolase activator NlpD, containing LysM domain	COO91_07166	111.24	tr|A0A2K8ST74|A0A2K8ST74_9NOSO Chromosome segregation ATPase OS=Nostoc flagelliforme CCNUN1 OX=2038116 GN=COO91_04631 PE=4 SV=1	1087	63.766	62.454	GTNPTAAVTAEVDTLK(0.5)FK(0.5)	GTNPTAAVTAEVDTLK(0)FK(0)	16	2	-0.36647
A0A2K8T0B5	87	K	Murein DD-endopeptidase MepM and murein hydrolase activator NlpD, containing LysM domain	COO91_07166	111.24	tr|A0A2K8ST95|A0A2K8ST95_9NOSO Elongation factor Tu OS=Nostoc flagelliforme CCNUN1 OX=2038116 GN=tuf PE=3 SV=1	1087	63.766	62.454	GTNPTAAVTAEVDTLK(0.5)FK(0.5)	GTNPTAAVTAEVDTLK(0)FK(0)	18	2	-0.36647
A0A2K8T0C4	288	K	PPC domain-containing protein	COO91_07091	46.407	tr|A0A2K8ST99|A0A2K8ST99_9NOSO CcmK, carbon dioxide concentrating mechanism protein CcmK OS=Nostoc flagelliforme CCNUN1 OX=2038116 GN=COO91_04648 PE=4 SV=1	454	29.662	29.662	LQVVGNNTQILLDK(1)PGVEPDEIIGIVQR	LQVVGNNTQILLDK(30)PGVEPDEIIGIVQR	14	3	-2.6635
A0A2K8T0D2	65	K	Uncharacterized protein	COO91_07201	9.1461	tr|A0A2K8STA7|A0A2K8STA7_9NOSO Uncharacterized protein OS=Nostoc flagelliforme CCNUN1 OX=2038116 GN=COO91_04550 PE=4 SV=1	79	38.322	24.851	HRLEEK(1)R	HRLEEK(25)R	6	1	0.38142
A0A2K8T0M1	60	K	Putative membrane protein	COO91_07287	25.417	tr|A0A2K8STF2|A0A2K8STF2_9NOSO Photosystem I P700 chlorophyll a apoprotein A2 OS=Nostoc flagelliforme CCNUN1 OX=2038116 GN=psaB PE=3 SV=1;tr|A0A2K8T195|A0A2K8T195_9NOSO Photosystem I P700 chlorophyll a apoprotein A2 OS=Nostoc flagelliforme CCNUN1 OX=203811	232	69.369	69.369	GALTALAGGGLVYQGATK(0.979)QSTIQK(0.021)	GALTALAGGGLVYQGATK(17)QSTIQK(-17)	18	2	-0.42634
A0A2K8T0M1	66	K	Putative membrane protein	COO91_07287	25.417	tr|A0A2K8SUN2|A0A2K8SUN2_9NOSO Uncharacterized protein OS=Nostoc flagelliforme CCNUN1 OX=2038116 GN=COO91_05168 PE=4 SV=1	232	30.172	30.172	QSTIQK(0.97)AQEAIGLNQPIK(0.011)VEK(0.019)	QSTIQK(17)AQEAIGLNQPIK(-20)VEK(-17)	6	3	-0.69142
A0A2K8T0M1	8	K	Putative membrane protein	COO91_07287	25.417	tr|A0A2K8SUN8|A0A2K8SUN8_9NOSO Prokaryotic membrane lipoprotein lipid attachment site profile OS=Nostoc flagelliforme CCNUN1 OX=2038116 GN=COO91_05153 PE=4 SV=1	232	29.408	29.408	TSTSGDK(1)SSTNQPEASEVER	TSTSGDK(29)SSTNQPEASEVER	7	2	-0.29417
A0A2K8T0M2	83	K	Uncharacterized protein	COO91_07289	15.116	tr|A0A2K8SUP8|A0A2K8SUP8_9NOSO Uncharacterized protein OS=Nostoc flagelliforme CCNUN1 OX=2038116 GN=COO91_05163 PE=4 SV=1	132	51.872	51.872	EK(1)LNLDEETPR	EK(52)LNLDEETPR	2	2	0.4846
A0A2K8T0M5	18	K	SAM50, outer membrane protein insertion porin family	COO91_07306	54.724	tr|A0A2K8SUY3|A0A2K8SUY3_9NOSO Uncharacterized protein OS=Nostoc flagelliforme CCNUN1 OX=2038116 GN=COO91_05263 PE=4 SV=1	502	15.528	15.528	RVQITVVAIAVMLVGGK(1)	RVQITVVAIAVMLVGGK(16)	17	2	-7.4978
A0A2K8T0N4	54	K	PfpI, protease I	COO91_07286	39.665	tr|A0A2K8SUY3|A0A2K8SUY3_9NOSO Uncharacterized protein OS=Nostoc flagelliforme CCNUN1 OX=2038116 GN=COO91_05263 PE=4 SV=1	365	13.648	13.648	MNEK(0.044)YK(0.147)GK(0.809)	MNEK(-13)YK(-7.4)GK(7.4)	8	1	-1.4959
A0A2K8T0N4	284	K	PfpI, protease I	COO91_07286	39.665	tr|A0A2K8SUY3|A0A2K8SUY3_9NOSO Uncharacterized protein OS=Nostoc flagelliforme CCNUN1 OX=2038116 GN=COO91_05263 PE=4 SV=1	365	93.772	45.183	VK(1)TAMTGSDDIYQLR	VK(45)TAMTGSDDIYQLR	2	2	1.2199
A0A2K8T0U7	94	K	Putative dehydrogenase	COO91_07308	40.515	tr|A0A2K8SUZ5|A0A2K8SUZ5_9NOSO ModA, molybdate transport system substrate-binding protein OS=Nostoc flagelliforme CCNUN1 OX=2038116 GN=COO91_05220 PE=3 SV=1	365	11.054	11.054	TVLQAGK(0.34)HLLLEK(0.789)PTTLNAVEAK(0.871)	TVLQAGK(-4.9)HLLLEK(4.9)PTTLNAVEAK(7.1)	13	4	-3.7182
A0A2K8T0U7	104	K	Putative dehydrogenase	COO91_07308	40.515	tr|A0A2K8SVM1|A0A2K8SVM1_9NOSO NifZ, nitrogen fixation protein NifZ OS=Nostoc flagelliforme CCNUN1 OX=2038116 GN=COO91_05478 PE=3 SV=1	365	11.054	11.054	TVLQAGK(0.34)HLLLEK(0.789)PTTLNAVEAK(0.871)	TVLQAGK(-4.9)HLLLEK(4.9)PTTLNAVEAK(7.1)	23	4	-3.7182
A0A2K8T0Y0	207	K	Carbohydrate-selective porin OprB	COO91_06684	58.581	tr|A0A2K8SVS4|A0A2K8SVS4_9NOSO Cyanophycinase OS=Nostoc flagelliforme CCNUN1 OX=2038116 GN=COO91_05427 PE=3 SV=1	546	61.194	50.116	LNLYSSFTGK(1)DQLQIR	LNLYSSFTGK(50)DQLQIR	10	2	-0.99155
A0A2K8T196	118	K	Putative membrane protein	COO91_07515	27.115	tr|A0A2K8SW68|A0A2K8SW68_9NOSO BCP, peroxiredoxin Q/BCP OS=Nostoc flagelliforme CCNUN1 OX=2038116 GN=COO91_05709 PE=4 SV=1	250	55.604	38.584	LGVTPPTTPAPK(1)FQASLAR	LGVTPPTTPAPK(39)FQASLAR	12	2	-0.50941
A0A2K8T1A0	233	K	Xaa-Pro aminopeptidase	COO91_07524	39.943	tr|A0A2K8SWI0|A0A2K8SWI0_9NOSO Uncharacterized protein OS=Nostoc flagelliforme CCNUN1 OX=2038116 GN=COO91_05809 PE=4 SV=1	362	22.039	22.039	FVCFGK(1)LSDEQAELHSHVR	FVCFGK(22)LSDEQAELHSHVR	6	4	0.83789
A0A2K8T1W7	133	K	Uncharacterized protein	COO91_07750	31.067	tr|A0A2K8SWI8|A0A2K8SWI8_9NOSO Archaeal aspartate aminotransferase OS=Nostoc flagelliforme CCNUN1 OX=2038116 GN=COO91_05812 PE=3 SV=1	295	73.305	69.201	FTTK(1)PSTSTTSSQFPDFR	FTTK(69)PSTSTTSSQFPDFR	4	2	-1.445
A0A2K8T213	4	K	Uncharacterized protein	COO91_07761	9.0054	tr|A0A2K8SWI8|A0A2K8SWI8_9NOSO Archaeal aspartate aminotransferase OS=Nostoc flagelliforme CCNUN1 OX=2038116 GN=COO91_05812 PE=3 SV=1	81	12.582	12.582	MAIK(0.514)K(0.514)INSSLPLNK(0.972)	MAIK(0)K(0)INSSLPLNK(12)	4	2	-8.4701
A0A2K8T213	5	K	Uncharacterized protein	COO91_07761	9.0054	tr|A0A2K8SWP7|A0A2K8SWP7_9NOSO Glycine/D-amino acid oxidase OS=Nostoc flagelliforme CCNUN1 OX=2038116 GN=COO91_05861 PE=4 SV=1	81	12.582	12.582	MAIK(0.514)K(0.514)INSSLPLNK(0.972)	MAIK(0)K(0)INSSLPLNK(12)	5	2	-8.4701
A0A2K8T213	14	K	Uncharacterized protein	COO91_07761	9.0054	tr|A0A2K8SWQ6|A0A2K8SWQ6_9NOSO Uncharacterized protein OS=Nostoc flagelliforme CCNUN1 OX=2038116 GN=COO91_05888 PE=4 SV=1	81	12.582	12.582	MAIK(0.514)K(0.514)INSSLPLNK(0.972)	MAIK(0)K(0)INSSLPLNK(12)	14	2	-8.4701
A0A2K8T2E7	86	K	Nucleoside diphosphate kinase	ndk	16.79	tr|A0A2K8SWQ6|A0A2K8SWQ6_9NOSO Uncharacterized protein OS=Nostoc flagelliforme CCNUN1 OX=2038116 GN=COO91_05888 PE=4 SV=1	149	128.46	66.485	K(1)IIGATNPLTSEPGTIR	K(66)IIGATNPLTSEPGTIR	1	2	-1.6655
A0A2K8T2F2	82	K	Ubiqui/menaqui biosynthesis C-methylase UbiE	COO91_07976	26.07	tr|A0A2K8SX07|A0A2K8SX07_9NOSO Ribulose bisphosphate carboxylase large chain OS=Nostoc flagelliforme CCNUN1 OX=2038116 GN=cbbL PE=3 SV=1;tr|O86388|O86388_9NOSO RuBisCO large subunit (Fragment) OS=Nostoc flagelliforme OX=1306274 GN=rbcL PE=4 SV=1	224	13.345	13.345	EK(1)SEK(1)LGLDAQFVVADMAK(1)	EK(13)SEK(13)LGLDAQFVVADMAK(13)	2	3	-9.4343
A0A2K8T2F2	85	K	Ubiqui/menaqui biosynthesis C-methylase UbiE	COO91_07976	26.07	tr|A0A2K8SX07|A0A2K8SX07_9NOSO Ribulose bisphosphate carboxylase large chain OS=Nostoc flagelliforme CCNUN1 OX=2038116 GN=cbbL PE=3 SV=1	224	13.345	13.345	EK(1)SEK(1)LGLDAQFVVADMAK(1)	EK(13)SEK(13)LGLDAQFVVADMAK(13)	5	3	-9.4343
A0A2K8T2F2	99	K	Ubiqui/menaqui biosynthesis C-methylase UbiE	COO91_07976	26.07	tr|A0A2K8SX07|A0A2K8SX07_9NOSO Ribulose bisphosphate carboxylase large chain OS=Nostoc flagelliforme CCNUN1 OX=2038116 GN=cbbL PE=3 SV=1	224	13.345	13.345	EK(1)SEK(1)LGLDAQFVVADMAK(1)	EK(13)SEK(13)LGLDAQFVVADMAK(13)	19	3	-9.4343
A0A2K8T2I5	11	K	Uncharacterized protein	COO91_08009	9.1463	tr|A0A2K8SX07|A0A2K8SX07_9NOSO Ribulose bisphosphate carboxylase large chain OS=Nostoc flagelliforme CCNUN1 OX=2038116 GN=cbbL PE=3 SV=1	80	10.787	10.787	MQVLLLFMSRK(1)R	MQVLLLFMSRK(11)R	11	2	-7.1438
A0A2K8T2U2	53	K	Signal transduction histidine kinase regulating C4-dicarboxylate transport system	COO91_08126	53.253	tr|A0A2K8SX07|A0A2K8SX07_9NOSO Ribulose bisphosphate carboxylase large chain OS=Nostoc flagelliforme CCNUN1 OX=2038116 GN=cbbL PE=3 SV=1	475	12.596	12.596	K(1)LELLATSNAR	K(13)LELLATSNAR	1	3	-0.55024
A0A2K8T313	8	K	Taurine dioxygenase, alpha-ketoglutarate-dependent	COO91_08189	11.334	tr|A0A2K8SX07|A0A2K8SX07_9NOSO Ribulose bisphosphate carboxylase large chain OS=Nostoc flagelliforme CCNUN1 OX=2038116 GN=cbbL PE=3 SV=1	102	26.947	24.821	MTYNQQHK(1)QLRHK(1)	MTYNQQHK(25)QLRHK(25)	8	2	0.30204
A0A2K8T313	13	K	Taurine dioxygenase, alpha-ketoglutarate-dependent	COO91_08189	11.334	tr|A0A2K8SX07|A0A2K8SX07_9NOSO Ribulose bisphosphate carboxylase large chain OS=Nostoc flagelliforme CCNUN1 OX=2038116 GN=cbbL PE=3 SV=1	102	26.947	24.821	MTYNQQHK(1)QLRHK(1)	MTYNQQHK(25)QLRHK(25)	13	2	0.30204
A0A2K8T3I4	8	K	Radical SAM superfamily enzyme, MoaA/NifB/PqqE/SkfB family	COO91_08366	53.254	tr|A0A2K8SXG1|A0A2K8SXG1_9NOSO Chaperone protein DnaK OS=Nostoc flagelliforme CCNUN1 OX=2038116 GN=dnaK PE=2 SV=1	465	10.972	10.972	MTIK(0.077)DTQK(0.923)LLPTQIR	MTIK(-11)DTQK(11)LLPTQIR	8	2	-7.8191
A0A2K8T4N3	72	K	Putative Rossmann fold nucleotide-binding protein DprA/Smf involved in DNA uptake	COO91_08822	18.534	tr|A0A2K8SXG1|A0A2K8SXG1_9NOSO Chaperone protein DnaK OS=Nostoc flagelliforme CCNUN1 OX=2038116 GN=dnaK PE=2 SV=1	167	35.246	35.246	IITSGATGTNSAAIK(1)GATR	IITSGATGTNSAAIK(35)GATR	15	2	-1.3236
A0A2K8T4Q3	114	K	Carbohydrate-selective porin OprB	COO91_08842	57.843	tr|A0A2K8SXI3|A0A2K8SXI3_9NOSO Glyceraldehyde-3-phosphate dehydrogenase OS=Nostoc flagelliforme CCNUN1 OX=2038116 GN=COO91_05459 PE=3 SV=1	537	30.349	30.349	VNELIAAGTNDLVK(0.107)K(0.893)	VNELIAAGTNDLVK(-9.2)K(9.2)	15	3	4.8312
A0A2K8T4Y8	49	K	Transposase	COO91_08913	16.413	tr|A0A2K8SY16|A0A2K8SY16_9NOSO Uncaracterized surface protein containing fasciclin OS=Nostoc flagelliforme CCNUN1 OX=2038116 GN=COO91_06350 PE=4 SV=1	148	9.1312	6.387	VVALMTMNGSMDGVAFELFIEK(1)	VVALMTMNGSMDGVAFELFIEK(6.4)	22	3	0.46001
A0A2K8T526	21	K	NudF, ADP-ribose pyrophosphatase	COO91_08907	20.795	tr|A0A2K8SY16|A0A2K8SY16_9NOSO Uncaracterized surface protein containing fasciclin OS=Nostoc flagelliforme CCNUN1 OX=2038116 GN=COO91_06350 PE=4 SV=1	182	73.637	73.637	K(1)FDFEVNR	K(74)FDFEVNR	1	2	0.58538
A0A2K8T533	105	K	Uncharacterized protein	COO91_08963	17.059	tr|A0A2K8SY35|A0A2K8SY35_9NOSO Dps, starvation-inducible DNA-binding protein OS=Nostoc flagelliforme CCNUN1 OX=2038116 GN=COO91_06272 PE=3 SV=1;tr|E7CYW0|E7CYW0_9NOSO Ferritin Dps family protein OS=Nostoc flagelliforme NX-09 OX=744871 PE=3 SV=1	147	73.637	73.637	K(1)AFSLNVR	K(74)AFSLNVR	1	2	0.51101
A0A2K8T5D9	244	K	Bacterial EndoU nuclease	COO91_09020	27.686	tr|A0A2K8SY35|A0A2K8SY35_9NOSO Dps, starvation-inducible DNA-binding protein OS=Nostoc flagelliforme CCNUN1 OX=2038116 GN=COO91_06272 PE=3 SV=1;tr|E7CYW0|E7CYW0_9NOSO Ferritin Dps family protein OS=Nostoc flagelliforme NX-09 OX=744871 PE=3 SV=1	247	44.82	44.82	AIITYYPDATPQGAK(0.765)CK(0.235)I	AIITYYPDATPQGAK(5.1)CK(-5.1)I	15	2	-0.62046
A0A2K8T5V6	11	K	Uncharacterized protein	COO91_09117	5.2938	tr|A0A2K8SYI6|A0A2K8SYI6_9NOSO ParM, plasmid segregation protein ParM OS=Nostoc flagelliforme CCNUN1 OX=2038116 GN=COO91_06526 PE=4 SV=1	43	15.582	15.582	HQESFQNPTK(1)	HQESFQNPTK(16)	10	2	7.329
A0A2K8T620	15	K	DNA primase	COO91_09228	16.251	tr|A0A2K8SYJ0|A0A2K8SYJ0_9NOSO ATP synthase subunit beta OS=Nostoc flagelliforme CCNUN1 OX=2038116 GN=atpD PE=3 SV=1	146	12.376	12.376	MSLTPELVEQDDSGK(0.762)LIRK(0.238)	MSLTPELVEQDDSGK(5.1)LIRK(-5.1)	15	3	-9.2398
A0A2K8T6M6	39	K	Uncharacterized protein	COO91_09533	12.294	tr|A0A2K8SYM7|A0A2K8SYM7_9NOSO Uncharacterized protein OS=Nostoc flagelliforme CCNUN1 OX=2038116 GN=COO91_06468 PE=4 SV=1	112	30.068	30.068	GGYISEIGTVNK(1)AIVFR	GGYISEIGTVNK(30)AIVFR	12	2	-1.0475
A0A2K8T707	10	K	Uncharacterized protein	COO91_09607	5.9837	tr|A0A2K8SYZ8|A0A2K8SYZ8_9NOSO Transketolase OS=Nostoc flagelliforme CCNUN1 OX=2038116 GN=COO91_06695 PE=3 SV=1	54	22.142	15.616	MSAAITDITK(1)SSLSLK(1)	MSAAITDITK(16)SSLSLK(16)	10	2	5.592
A0A2K8T707	16	K	Uncharacterized protein	COO91_09607	5.9837	tr|A0A2K8SZ44|A0A2K8SZ44_9NOSO L-asparaginase OS=Nostoc flagelliforme CCNUN1 OX=2038116 GN=COO91_06642 PE=4 SV=1	54	22.142	15.616	MSAAITDITK(1)SSLSLK(1)	MSAAITDITK(16)SSLSLK(16)	16	2	5.592
A0A2K8T760	245	K	Putative dehydrogenase	COO91_09670	41.597	tr|A0A2K8SZD5|A0A2K8SZD5_9NOSO Photosystem I iron-sulfur center OS=Nostoc flagelliforme CCNUN1 OX=2038116 GN=psaC PE=3 SV=1	373	36.902	36.902	LATFTCSFGGAK(0.995)VSTYQVVGTK(0.005)	LATFTCSFGGAK(23)VSTYQVVGTK(-23)	12	2	-0.53868
A0A2K8T7C6	92	K	Autotransporter translocation and assembly factor TamB	COO91_09674	28.603	tr|A0A2K8SZF4|A0A2K8SZF4_9NOSO Carboxypeptidase C OS=Nostoc flagelliforme CCNUN1 OX=2038116 GN=COO91_06766 PE=4 SV=1	264	96.27	52.201	FTNSESNFDPITVSNTK(1)VLR	FTNSESNFDPITVSNTK(52)VLR	17	2	-2.4674
A0A2K8T7S0	11	K	Arc-type ribbon-helix-helix	COO91_09927	6.027	tr|A0A2K8SZM7|A0A2K8SZM7_9NOSO Ca2+-binding protein, RTX toxin-related OS=Nostoc flagelliforme CCNUN1 OX=2038116 GN=COO91_06932 PE=3 SV=1	53	22.044	12.596	MQISITDDLK(1)K(1)	MQISITDDLK(13)K(13)	10	2	1.4599
A0A2K8T7S0	12	K	Arc-type ribbon-helix-helix	COO91_09927	6.027	tr|A0A2K8SZM7|A0A2K8SZM7_9NOSO Ca2+-binding protein, RTX toxin-related OS=Nostoc flagelliforme CCNUN1 OX=2038116 GN=COO91_06932 PE=3 SV=1	53	22.044	12.596	MQISITDDLK(1)K(1)	MQISITDDLK(13)K(13)	11	2	1.4599
A0A2K8T8N2	4	K	Non-ribosomal peptide synthetase component F	COO91_10224	115.67	tr|A0A2K8SZM7|A0A2K8SZM7_9NOSO Ca2+-binding protein, RTX toxin-related OS=Nostoc flagelliforme CCNUN1 OX=2038116 GN=COO91_06932 PE=3 SV=1	1006	30.918	22.004	MELK(1)IQSNHLK(1)	MELK(22)IQSNHLK(22)	4	2	-0.99219
A0A2K8T8N2	11	K	Non-ribosomal peptide synthetase component F	COO91_10224	115.67	tr|A0A2K8SZM7|A0A2K8SZM7_9NOSO Ca2+-binding protein, RTX toxin-related OS=Nostoc flagelliforme CCNUN1 OX=2038116 GN=COO91_06932 PE=3 SV=1	1006	30.918	22.004	MELK(1)IQSNHLK(1)	MELK(22)IQSNHLK(22)	11	2	-0.99219
A0A2K8T8P6	1564	K	DNA-binding response regulator, OmpR family, containings REC and winged-helix	COO91_10258	175.58	tr|A0A2K8SZM7|A0A2K8SZM7_9NOSO Ca2+-binding protein, RTX toxin-related OS=Nostoc flagelliforme CCNUN1 OX=2038116 GN=COO91_06932 PE=3 SV=1	1565	10.972	10.972	IQEFLLSLDSNSK(1)I	IQEFLLSLDSNSK(11)I	13	3	8.9438
A0A2K8T8Q6	8	K	Beta-mannanase	COO91_10245	36.921	tr|A0A2K8SZP2|A0A2K8SZP2_9NOSO P-loop containing nucleoside triphosphate hydrolase OS=Nostoc flagelliforme CCNUN1 OX=2038116 GN=COO91_06947 PE=4 SV=1	329	27.705	27.705	MAIADASK(1)	MAIADASK(28)	8	2	0.97318
A0A2K8T8Z9	11	K	Uncharacterized protein	COO91_10351	14.757	tr|A0A2K8SZR7|A0A2K8SZR7_9NOSO Nucleotide-binding universal stress protein, UspA family OS=Nostoc flagelliforme CCNUN1 OX=2038116 GN=COO91_06984 PE=3 SV=1	131	26.947	26.947	MK(0.002)INFLTIDK(0.998)	MK(-27)INFLTIDK(27)	10	3	-4.1376
A0A2K8T9M3	408	K	FUCA, alpha-L-fucosidase	COO91_10617	55.151	tr|A0A2K8T034|A0A2K8T034_9NOSO Phosphoglycerate kinase OS=Nostoc flagelliforme CCNUN1 OX=2038116 GN=pgk PE=3 SV=1	482	30.172	30.172	YTTNK(1)GNLYAVLLDTPTSR	YTTNK(30)GNLYAVLLDTPTSR	5	2	0.64302
A0A2K8TA49	12	K	Methyl-accepting chemotaxis protein	COO91_09804	10.9	tr|A0A2K8T090|A0A2K8T090_9NOSO Histidine kinase-like ATPase OS=Nostoc flagelliforme CCNUN1 OX=2038116 GN=COO91_07132 PE=4 SV=1	96	21.15	21.15	MLVSLLERVYVK(1)SAK(1)	MLVSLLERVYVK(21)SAK(21)	12	2	8.2412
A0A2K8TA49	15	K	Methyl-accepting chemotaxis protein	COO91_09804	10.9	tr|A0A2K8T0B5|A0A2K8T0B5_9NOSO Murein DD-endopeptidase MepM and murein hydrolase activator NlpD, containing LysM domain OS=Nostoc flagelliforme CCNUN1 OX=2038116 GN=COO91_07166 PE=4 SV=1	96	21.15	21.15	MLVSLLERVYVK(1)SAK(1)	MLVSLLERVYVK(21)SAK(21)	15	2	8.2412
A0A2K8TAA0	32	K	Uncharacterized protein	COO91_10862	9.3221	tr|A0A2K8T0M1|A0A2K8T0M1_9NOSO Putative membrane protein OS=Nostoc flagelliforme CCNUN1 OX=2038116 GN=COO91_07287 PE=4 SV=1	79	40.53	40.53	LWDKIELIVEWLIFIGLMIAATLK(1)	LWDK(-41)IELIVEWLIFIGLMIAATLK(41)	24	4	-7.1876
A0A2K8TAG4	117	K	Serine/threonine protein kinase	COO91_10889	67.674	tr|A0A2K8T0M1|A0A2K8T0M1_9NOSO Putative membrane protein OS=Nostoc flagelliforme CCNUN1 OX=2038116 GN=COO91_07287 PE=4 SV=1	601	40.224	40.224	QIQDISEAK(1)TQTLDISTAIK	QIQDISEAK(40)TQTLDISTAIK(-40)	9	3	-9.5849
A0A2K8TAJ5	5	K	Arc-type ribbon-helix-helix	COO91_10957	9.658	tr|A0A2K8T0N4|A0A2K8T0N4_9NOSO PfpI, protease I OS=Nostoc flagelliforme CCNUN1 OX=2038116 GN=COO91_07286 PE=3 SV=1	84	39.324	30.593	MAADK(1)QIIIR	MAADK(31)QIIIR	5	3	-5.9688
A0A2K8TB18	8	K	Uncharacterized protein	COO91_11129	14.799	tr|A0A2K8T0U7|A0A2K8T0U7_9NOSO Putative dehydrogenase OS=Nostoc flagelliforme CCNUN1 OX=2038116 GN=COO91_07308 PE=4 SV=1	129	14.535	13.648	SLEALLK(1)WK(1)	SLEALLK(14)WK(14)	7	3	9.8
A0A2K8TB18	10	K	Uncharacterized protein	COO91_11129	14.799	tr|A0A2K8T213|A0A2K8T213_9NOSO Uncharacterized protein OS=Nostoc flagelliforme CCNUN1 OX=2038116 GN=COO91_07761 PE=4 SV=1	129	14.535	13.648	SLEALLK(1)WK(1)	SLEALLK(14)WK(14)	9	3	9.8
A0A2K8TB22	713	K	Deoxyribonuclease I	COO91_11151	106.61	tr|A0A2K8T213|A0A2K8T213_9NOSO Uncharacterized protein OS=Nostoc flagelliforme CCNUN1 OX=2038116 GN=COO91_07761 PE=4 SV=1	1023	21.708	21.708	SK(1)SGTGTGADADQGDGQGAFNFTR	SK(22)SGTGTGADADQGDGQGAFNFTR	2	2	0.26416
A0A2K8TB79	234	K	Uncharacterized protein	COO91_11202	43.739	tr|A0A2K8T2F2|A0A2K8T2F2_9NOSO Ubiqui/menaqui biosynthesis C-methylase UbiE OS=Nostoc flagelliforme CCNUN1 OX=2038116 GN=COO91_07976 PE=4 SV=1	438	194.44	78.359	GIGISNSK(1)GSTIAVGQGNDYLSGTGTGGAR	GIGISNSK(78)GSTIAVGQGNDYLSGTGTGGAR	8	3	-0.6655
A5YN46	52	K	Superoxide dismutase	SOD	22.303	tr|A0A2K8T2F2|A0A2K8T2F2_9NOSO Ubiqui/menaqui biosynthesis C-methylase UbiE OS=Nostoc flagelliforme CCNUN1 OX=2038116 GN=COO91_07976 PE=4 SV=1	200	44.82	44.82	LTEGTELANK(0.99)SLEEVIK(0.01)	LTEGTELANK(20)SLEEVIK(-20)	10	2	-0.11143
A5YN46	88	K	Superoxide dismutase	SOD	22.303	tr|A0A2K8T313|A0A2K8T313_9NOSO Taurine dioxygenase, alpha-ketoglutarate-dependent OS=Nostoc flagelliforme CCNUN1 OX=2038116 GN=COO91_08189 PE=4 SV=1	200	32.138	32.138	AGIFNNAAQVWNHTFFWNSLK(0.995)PAGGGAPTGDLAAK(0.005)	AGIFNNAAQVWNHTFFWNSLK(23)PAGGGAPTGDLAAK(-23)	21	3	9.618
A5YN46	42	K	Superoxide dismutase	SOD	22.303	tr|A0A2K8T707|A0A2K8T707_9NOSO Uncharacterized protein OS=Nostoc flagelliforme CCNUN1 OX=2038116 GN=COO91_09607 PE=4 SV=1	200	160.52	160.52	AYVDNLNK(1)LTEGTELANK	AYVDNLNK(130)LTEGTELANK(-130)	8	2	-1.0063
A5YN46	59	K	Superoxide dismutase	SOD	22.303	tr|A0A2K8T7S0|A0A2K8T7S0_9NOSO Arc-type ribbon-helix-helix OS=Nostoc flagelliforme CCNUN1 OX=2038116 GN=COO91_09927 PE=4 SV=1	200	70.195	50.116	SLEEVIK(0.999)TSFNDSSK(0.001)	SLEEVIK(31)TSFNDSSK(-31)	7	2	-0.18196
A5YN46	143	K	Superoxide dismutase	SOD	22.303	tr|A0A2K8T8N2|A0A2K8T8N2_9NOSO Non-ribosomal peptide synthetase component F OS=Nostoc flagelliforme CCNUN1 OX=2038116 GN=COO91_10224 PE=4 SV=1	200	112.7	112.7	VIK(1)TPNAENPLAHGKK	VIK(110)TPNAENPLAHGK(-110)K(-110)	3	3	-0.15947
D4NZI3	81	K	C-phycocyanin alpha subunit		17.456	tr|A0A2K8TA49|A0A2K8TA49_9NOSO Methyl-accepting chemotaxis protein OS=Nostoc flagelliforme CCNUN1 OX=2038116 GN=COO91_09804 PE=4 SV=1;tr|A0A2K8T706|A0A2K8T706_9NOSO Uncharacterized protein OS=Nostoc flagelliforme CCNUN1 OX=2038116 GN=COO91_09642 PE=4 SV=1	162	38.05	38.05	LTEGAAQAVYNK(0.001)FPYTTQQQGPNFASTNTGK(0.5)EK(0.5)	LTEGAAQAVYNK(-28)FPYTTQQQGPNFASTNTGK(0)EK(0)	31	3	-0.31095
D4NZI3	42	K	C-phycocyanin alpha subunit		17.456	tr|A0A2K8TB18|A0A2K8TB18_9NOSO Uncharacterized protein OS=Nostoc flagelliforme CCNUN1 OX=2038116 GN=COO91_11129 PE=4 SV=1;tr|A0A2K8T819|A0A2K8T819_9NOSO Uncharacterized protein OS=Nostoc flagelliforme CCNUN1 OX=2038116 GN=COO91_09408 PE=4 SV=1	162	171.2	171.2	QAPASLEAAK(1)SLSANAQR	QAPASLEAAK(170)SLSANAQR	10	2	-1.4074
D4NZI3	62	K	C-phycocyanin alpha subunit		17.456	tr|A5YN46|A5YN46_9NOSO Superoxide dismutase OS=Nostoc flagelliforme OX=1306274 GN=SOD PE=3 SV=1;tr|A0A2K8SGB2|A0A2K8SGB2_9NOSO Superoxide dismutase OS=Nostoc flagelliforme CCNUN1 OX=2038116 GN=COO91_00327 PE=3 SV=1	162	100.27	62.65	LTEGAAQAVYNK(1)FPYTTQQQGPNFASTNTGK	LTEGAAQAVYNK(53)FPYTTQQQGPNFASTNTGK(-53)	12	3	2.0289
D4NZI3	83	K	C-phycocyanin alpha subunit		17.456	tr|A5YN46|A5YN46_9NOSO Superoxide dismutase OS=Nostoc flagelliforme OX=1306274 GN=SOD PE=3 SV=1;tr|A0A2K8SGB2|A0A2K8SGB2_9NOSO Superoxide dismutase OS=Nostoc flagelliforme CCNUN1 OX=2038116 GN=COO91_00327 PE=3 SV=1	162	38.05	38.05	LTEGAAQAVYNK(0.001)FPYTTQQQGPNFASTNTGK(0.5)EK(0.5)	LTEGAAQAVYNK(-28)FPYTTQQQGPNFASTNTGK(0)EK(0)	33	3	-0.31095
D4NZI3	2	K	C-phycocyanin alpha subunit		17.456	tr|A5YN46|A5YN46_9NOSO Superoxide dismutase OS=Nostoc flagelliforme OX=1306274 GN=SOD PE=3 SV=1;tr|A0A2K8SGB2|A0A2K8SGB2_9NOSO Superoxide dismutase OS=Nostoc flagelliforme CCNUN1 OX=2038116 GN=COO91_00327 PE=3 SV=1	162	83.474	33.456	MK(1)TPLTEAVAAADSQGR	MK(33)TPLTEAVAAADSQGR	2	2	-2.351
E7DPI5	8	K	RNA polymerase sigma factor	Nfla_1604	18.441	tr|A5YN46|A5YN46_9NOSO Superoxide dismutase OS=Nostoc flagelliforme OX=1306274 GN=SOD PE=3 SV=1;tr|A0A2K8SGB2|A0A2K8SGB2_9NOSO Superoxide dismutase OS=Nostoc flagelliforme CCNUN1 OX=2038116 GN=COO91_00327 PE=3 SV=1	158	15.879	15.879	MPIHINEK(1)LNK(1)IK(1)	MPIHINEK(16)LNK(16)IK(16)	8	2	-9.4587
E7DPI5	11	K	RNA polymerase sigma factor	Nfla_1604	18.441	tr|D4NZI3|D4NZI3_9NOSO C-phycocyanin alpha subunit OS=Nostoc flagelliforme NX-09 OX=744871 PE=3 SV=1;tr|A0A2K8SJH2|A0A2K8SJH2_9NOSO CpcA, phycocyanin alpha chain OS=Nostoc flagelliforme CCNUN1 OX=2038116 GN=COO91_01514 PE=3 SV=1	158	15.879	15.879	MPIHINEK(1)LNK(1)IK(1)	MPIHINEK(16)LNK(16)IK(16)	11	2	-9.4587
E7DPI5	13	K	RNA polymerase sigma factor	Nfla_1604	18.441	tr|D4NZI3|D4NZI3_9NOSO C-phycocyanin alpha subunit OS=Nostoc flagelliforme NX-09 OX=744871 PE=3 SV=1;tr|A0A2K8SJH2|A0A2K8SJH2_9NOSO CpcA, phycocyanin alpha chain OS=Nostoc flagelliforme CCNUN1 OX=2038116 GN=COO91_01514 PE=3 SV=1	158	15.879	15.879	MPIHINEK(1)LNK(1)IK(1)	MPIHINEK(16)LNK(16)IK(16)	13	2	-9.4587
E7DPM3	2	K	Uncharacterized protein	Nfla_2702	21.904	tr|D4NZI3|D4NZI3_9NOSO C-phycocyanin alpha subunit OS=Nostoc flagelliforme NX-09 OX=744871 PE=3 SV=1;tr|A0A2K8SJH2|A0A2K8SJH2_9NOSO CpcA, phycocyanin alpha chain OS=Nostoc flagelliforme CCNUN1 OX=2038116 GN=COO91_01514 PE=3 SV=1	189	16.457	16.457	MK(1)K(1)VFALIEK(1)	MK(16)K(16)VFALIEK(16)	2	2	-7.907
E7DPM3	3	K	Uncharacterized protein	Nfla_2702	21.904	tr|D4NZI3|D4NZI3_9NOSO C-phycocyanin alpha subunit OS=Nostoc flagelliforme NX-09 OX=744871 PE=3 SV=1;tr|A0A2K8SJH2|A0A2K8SJH2_9NOSO CpcA, phycocyanin alpha chain OS=Nostoc flagelliforme CCNUN1 OX=2038116 GN=COO91_01514 PE=3 SV=1	189	16.457	16.457	MK(1)K(1)VFALIEK(1)	MK(16)K(16)VFALIEK(16)	3	2	-7.907
E7DPM3	10	K	Uncharacterized protein	Nfla_2702	21.904	tr|E7DPI5|E7DPI5_9NOSO RNA polymerase sigma factor OS=Nostoc flagelliforme str. Sunitezuoqi OX=676037 GN=Nfla_1604 PE=4 SV=1	189	16.457	16.457	MK(1)K(1)VFALIEK(1)	MK(16)K(16)VFALIEK(16)	10	2	-7.907
E7DPV4	206	K	Uncharacterized protein	Nfla_4706	29.047	tr|E7DPI5|E7DPI5_9NOSO RNA polymerase sigma factor OS=Nostoc flagelliforme str. Sunitezuoqi OX=676037 GN=Nfla_1604 PE=4 SV=1	262	22.039	22.039	TGAQAYLTSDCK(1)FHQFQESR	TGAQAYLTSDCK(22)FHQFQESR	12	3	-0.18521
E7DPV6	290	K	Uncharacterized protein	Nfla_4801	30.424	tr|E7DPM3|E7DPM3_9NOSO Uncharacterized protein OS=Nostoc flagelliforme str. Sunitezuoqi OX=676037 GN=Nfla_2702 PE=4 SV=1;tr|E7DPI0|E7DPI0_9NOSO Uncharacterized protein OS=Nostoc flagelliforme str. Sunitezuoqi OX=676037 GN=Nfla_1501 PE=4 SV=1;tr|A0A2K8SGV5|	302	79.235	79.235	DTTENAK(1)SSENQSNQYK	DTTENAK(68)SSENQSNQYK(-68)	7	2	1.1547
E7DPV6	130	K	Uncharacterized protein	Nfla_4801	30.424	tr|E7DPM3|E7DPM3_9NOSO Uncharacterized protein OS=Nostoc flagelliforme str. Sunitezuoqi OX=676037 GN=Nfla_2702 PE=4 SV=1;tr|E7DPI0|E7DPI0_9NOSO Uncharacterized protein OS=Nostoc flagelliforme str. Sunitezuoqi OX=676037 GN=Nfla_1501 PE=4 SV=1;tr|A0A2K8SGV5|	302	44.045	44.045	GIGDASK(1)TIGDGLGQTAK	GIGDASK(39)TIGDGLGQTAK(-39)	7	2	0.54758
E7DPV6	141	K	Uncharacterized protein	Nfla_4801	30.424	tr|E7DPV6|E7DPV6_9NOSO Uncharacterized protein OS=Nostoc flagelliforme str. Sunitezuoqi OX=676037 GN=Nfla_4801 PE=4 SV=1;tr|A0A2K8TDC8|A0A2K8TDC8_9NOSO 17 kDa surface antigen OS=Nostoc flagelliforme CCNUN1 OX=2038116 GN=COO91_11274 PE=4 SV=1	302	36.46	36.46	TIGDGLGQTAK(0.97)GLGDAAK(0.03)	TIGDGLGQTAK(15)GLGDAAK(-15)	11	2	-1.7184
E7DPV6	10	K	Uncharacterized protein	Nfla_4801	30.424	tr|E7DPV6|E7DPV6_9NOSO Uncharacterized protein OS=Nostoc flagelliforme str. Sunitezuoqi OX=676037 GN=Nfla_4801 PE=4 SV=1;tr|A0A2K8TDC8|A0A2K8TDC8_9NOSO 17 kDa surface antigen OS=Nostoc flagelliforme CCNUN1 OX=2038116 GN=COO91_11274 PE=4 SV=1	302	109.88	85.716	QALDK(1)QVENANR	QALDK(86)QVENANR	5	2	-1.1953
E7DPV6	5	K	Uncharacterized protein	Nfla_4801	30.424	tr|E7DPV6|E7DPV6_9NOSO Uncharacterized protein OS=Nostoc flagelliforme str. Sunitezuoqi OX=676037 GN=Nfla_4801 PE=4 SV=1;tr|A0A2K8TDC8|A0A2K8TDC8_9NOSO 17 kDa surface antigen OS=Nostoc flagelliforme CCNUN1 OX=2038116 GN=COO91_11274 PE=4 SV=1	302	84.309	84.309	VESK(1)QALDKQVENANR	VESK(61)QALDK(-61)QVENANR	4	3	1.5047
E7DPV7	87	K	Uncharacterized protein	Nfla_4802	20.4	tr|E7DPV6|E7DPV6_9NOSO Uncharacterized protein OS=Nostoc flagelliforme str. Sunitezuoqi OX=676037 GN=Nfla_4801 PE=4 SV=1;tr|A0A2K8TDC8|A0A2K8TDC8_9NOSO 17 kDa surface antigen OS=Nostoc flagelliforme CCNUN1 OX=2038116 GN=COO91_11274 PE=4 SV=1	198	83.214	83.214	GATGSFNQTVK(1)NVGNAIK	GATGSFNQTVK(41)NVGNAIK(-41)	11	2	0.032296
E7DPV7	76	K	Uncharacterized protein	Nfla_4802	20.4	tr|E7DPV7|E7DPV7_9NOSO Uncharacterized protein OS=Nostoc flagelliforme str. Sunitezuoqi OX=676037 GN=Nfla_4802 PE=4 SV=1;tr|A0A2K8TBQ8|A0A2K8TBQ8_9NOSO Anion permease ArsB/NhaD-like OS=Nostoc flagelliforme CCNUN1 OX=2038116 GN=COO91_11272 PE=4 SV=1	198	65.12	65.12	SVGNAVK(1)GATGSFNQTVK	SVGNAVK(43)GATGSFNQTVK(-43)	7	2	-0.87076

## Sheet: Table S3
Table S3: Classification of malonylated proteins according to their subcellular localization.
SeqID	Final_Localization	Final_Score
A0A1L5SMA2	Cytoplasmic	8.96
A0A2K8SFV9	Cytoplasmic	9.97
A0A2K8SG09	Cytoplasmic	9.97
A0A2K8SG38	Cytoplasmic	9.97
A0A2K8SGX5	Cytoplasmic	8.96
A0A2K8SGX8	Cytoplasmic	8.96
A0A2K8SHE4	Cytoplasmic	8.96
A0A2K8SHN4	Cytoplasmic	9.97
A0A2K8SIL8	Cytoplasmic	9.97
A0A2K8SIM9	Cytoplasmic	8.96
A0A2K8SJ12	Cytoplasmic	8.96
A0A2K8SJ77	Cytoplasmic	9.26
A0A2K8SJ95	Cytoplasmic	8.96
A0A2K8SJC1	Cytoplasmic	9.97
A0A2K8SJN2	Cytoplasmic	9.97
A0A2K8SK33	Cytoplasmic	9.26
A0A2K8SK99	Cytoplasmic	9.26
A0A2K8SKI5	Cytoplasmic	9.26
A0A2K8SLC8	Cytoplasmic	8.96
A0A2K8SLN7	Cytoplasmic	9.97
A0A2K8SLQ3	Cytoplasmic	9.97
A0A2K8SLS5	Cytoplasmic	9.97
A0A2K8SM45	Cytoplasmic	9.97
A0A2K8SM92	Cytoplasmic	9.26
A0A2K8SMJ1	Cytoplasmic	8.96
A0A2K8SMQ3	Cytoplasmic	8.96
A0A2K8SN83	Cytoplasmic	9.26
A0A2K8SN84	Cytoplasmic	8.96
A0A2K8SNB3	Cytoplasmic	8.96
A0A2K8SNN8	Cytoplasmic	8.96
A0A2K8SNU4	Cytoplasmic	9.26
A0A2K8SP02	Cytoplasmic	9.97
A0A2K8SP12	Cytoplasmic	9.97
A0A2K8SQ07	Cytoplasmic	9.97
A0A2K8SQR4	Cytoplasmic	9.26
A0A2K8SQR9	Cytoplasmic	9.97
A0A2K8SQV6	Cytoplasmic	8.96
A0A2K8SQW3	Cytoplasmic	9.97
A0A2K8SR02	Cytoplasmic	8.96
A0A2K8SR31	Cytoplasmic	8.96
A0A2K8SRA5	Cytoplasmic	9.97
A0A2K8SRI6	Cytoplasmic	8.96
A0A2K8SRL8	Cytoplasmic	9.97
A0A2K8SRM6	Cytoplasmic	8.96
A0A2K8SRR4	Cytoplasmic	9.97
A0A2K8SRR5	Cytoplasmic	8.96
A0A2K8SRT5	Cytoplasmic	9.97
A0A2K8SRW3	Cytoplasmic	8.96
A0A2K8SS28	Cytoplasmic	9.26
A0A2K8SS97	Cytoplasmic	10
A0A2K8SS98	Cytoplasmic	9.94
A0A2K8SSC2	Cytoplasmic	9.12
A0A2K8SSM5	Cytoplasmic	9.12
A0A2K8SSS1	Cytoplasmic	9.97
A0A2K8ST95	Cytoplasmic	9.97
A0A2K8ST99	Cytoplasmic	8.96
A0A2K8SU64	Cytoplasmic	8.96
A0A2K8SUD5	Cytoplasmic	9.26
A0A2K8SUN2	Cytoplasmic	8.96
A0A2K8SUY3	Cytoplasmic	9.97
A0A2K8SVG6	Cytoplasmic	9.97
A0A2K8SVH2	Cytoplasmic	9.26
A0A2K8SVM1	Cytoplasmic	8.96
A0A2K8SVS4	Cytoplasmic	8.96
A0A2K8SW68	Cytoplasmic	9.26
A0A2K8SWI0	Cytoplasmic	8.96
A0A2K8SWI8	Cytoplasmic	9.97
A0A2K8SX07	Cytoplasmic	8.96
A0A2K8SXG1	Cytoplasmic	9.97
A0A2K8SXI3	Cytoplasmic	9.97
A0A2K8SXJ0	Cytoplasmic	9.97
A0A2K8SXM2	Cytoplasmic	9.97
A0A2K8SY00	Cytoplasmic	9.97
A0A2K8SY35	Cytoplasmic	9.97
A0A2K8SYJ0	Cytoplasmic	9.12
A0A2K8SYM7	Cytoplasmic	8.96
A0A2K8SYR6	Cytoplasmic	9.26
A0A2K8SYZ8	Cytoplasmic	9.26
A0A2K8SZ44	Cytoplasmic	8.96
A0A2K8SZC9	Cytoplasmic	9.97
A0A2K8SZP2	Cytoplasmic	8.96
A0A2K8SZV9	Cytoplasmic	8.96
A0A2K8T034	Cytoplasmic	9.97
A0A2K8T0N4	Cytoplasmic	9.97
A0A2K8T1A0	Cytoplasmic	8.96
A0A2K8T2E7	Cytoplasmic	9.26
A0A2K8T2F2	Cytoplasmic	8.96
A0A2K8T3I4	Cytoplasmic	8.96
A0A2K8T526	Cytoplasmic	9.97
A0A2K8T8N2	Cytoplasmic	9.97
E7DPI5	Cytoplasmic	9.97
A0A2K8SGI3	CytoplasmicMembrane	9.82
A0A2K8SGZ6	CytoplasmicMembrane	9.82
A0A2K8SI26	CytoplasmicMembrane	10
A0A2K8SJL1	CytoplasmicMembrane	9.82
A0A2K8SJU5	CytoplasmicMembrane	9.82
A0A2K8SK65	CytoplasmicMembrane	9.82
A0A2K8SLI3	CytoplasmicMembrane	9.82
A0A2K8SLV2	CytoplasmicMembrane	10
A0A2K8SMI2	CytoplasmicMembrane	9.86
A0A2K8SPA4	CytoplasmicMembrane	9.82
A0A2K8SQ70	CytoplasmicMembrane	9.82
A0A2K8SQL3	CytoplasmicMembrane	10
A0A2K8SS43	CytoplasmicMembrane	7.88
A0A2K8SSL6	CytoplasmicMembrane	9.82
A0A2K8SSZ3	CytoplasmicMembrane	10
A0A2K8ST31	CytoplasmicMembrane	9.82
A0A2K8ST58	CytoplasmicMembrane	10
A0A2K8ST67	CytoplasmicMembrane	10
A0A2K8ST74	CytoplasmicMembrane	9.8
A0A2K8STF2	CytoplasmicMembrane	10
A0A2K8STQ9	CytoplasmicMembrane	9.86
A0A2K8SUJ8	CytoplasmicMembrane	10
A0A2K8SUW3	CytoplasmicMembrane	10
A0A2K8SWP7	CytoplasmicMembrane	9.82
A0A2K8SZD5	CytoplasmicMembrane	10
A0A2K8T090	CytoplasmicMembrane	7.88
A0A2K8T2U2	CytoplasmicMembrane	9.82
A0A2K8T6M6	CytoplasmicMembrane	9.86
A0A2K8T8P6	CytoplasmicMembrane	10
A0A2K8TAA0	CytoplasmicMembrane	9.82
A0A2K8TAG4	CytoplasmicMembrane	7.88
E7DPM3	CytoplasmicMembrane	9.82
A0A2K8SGU2	Extracellular	9.17
A0A2K8SIL4	Extracellular	10
A0A2K8SK51	Extracellular	10
A0A2K8SKI7	Extracellular	10
A0A2K8SKK7	Extracellular	9.64
A0A2K8SNU7	Extracellular	9.64
A0A2K8SQ31	Extracellular	9.65
A0A2K8SS44	Extracellular	9.71
A0A2K8SZM7	Extracellular	10
A0A2K8SZS3	Extracellular	10
A0A2K8T0B5	Extracellular	10
A0A2K8T0C4	Extracellular	10
A0A2K8T7C6	Extracellular	9.64
A0A2K8TB22	Extracellular	9.44
A0A2K8TB79	Extracellular	10
A0A2K8SSF3	OuterMembrane	9.49
A0A2K8SVE1	OuterMembrane	9.49
A0A2K8T0M5	OuterMembrane	10
A0A2K8T0Y0	OuterMembrane	9.95
A0A2K8SS57	Periplasmic	9.76
A0A2K8SUN8	Periplasmic	9.84
A0A2K8SUU1	Periplasmic	9.84
A0A2K8SUZ5	Periplasmic	9.44
A5YN46	Periplasmic	10
A0A2K8SGF7	Unknown	2
A0A2K8SHB5	Unknown	2
A0A2K8SHH5	Unknown	2
A0A2K8SHL1	Unknown	2.5
A0A2K8SHV3	Unknown	2
A0A2K8SIV5	Unknown	2
A0A2K8SJ00	Unknown	2
A0A2K8SJ75	Unknown	2
A0A2K8SJA3	Unknown	2
A0A2K8SJQ5	Unknown	2
A0A2K8SJZ9	Unknown	2
A0A2K8SK76	Unknown	2
A0A2K8SK78	Unknown	2
A0A2K8SKD7	Unknown	6.26
A0A2K8SKF6	Unknown	2.5
A0A2K8SKR6	Unknown	2
A0A2K8SKT7	Unknown	5.76
A0A2K8SLB0	Unknown	2
A0A2K8SMN1	Unknown	2
A0A2K8SMW9	Unknown	7
A0A2K8SNB8	Unknown	2
A0A2K8SNI2	Unknown	2
A0A2K8SNV4	Unknown	2
A0A2K8SPC1	Unknown	2.5
A0A2K8SQ37	Unknown	2
A0A2K8SQ60	Unknown	2
A0A2K8SQH8	Unknown	5.02
A0A2K8SQI1	Unknown	2
A0A2K8SQK3	Unknown	2.5
A0A2K8SQR2	Unknown	2
A0A2K8SQU3	Unknown	2
A0A2K8SQX2	Unknown	2
A0A2K8SR19	Unknown	2
A0A2K8SR47	Unknown	2.5
A0A2K8SR82	Unknown	2
A0A2K8SRC6	Unknown	2
A0A2K8SRJ5	Unknown	2.5
A0A2K8SRQ0	Unknown	2
A0A2K8SRR1	Unknown	2
A0A2K8SS66	Unknown	2
A0A2K8SS87	Unknown	2
A0A2K8SSP1	Unknown	2
A0A2K8SST9	Unknown	2
A0A2K8SSX4	Unknown	2.5
A0A2K8STA7	Unknown	2
A0A2K8STD0	Unknown	2
A0A2K8STT5	Unknown	2
A0A2K8SUP8	Unknown	2
A0A2K8SUV5	Unknown	4.86
A0A2K8SW52	Unknown	2
A0A2K8SWQ6	Unknown	2
A0A2K8SWW8	Unknown	2
A0A2K8SX21	Unknown	2
A0A2K8SX59	Unknown	2
A0A2K8SY16	Unknown	4.93
A0A2K8SYI6	Unknown	2
A0A2K8SZ70	Unknown	2
A0A2K8SZF4	Unknown	2
A0A2K8SZP6	Unknown	2
A0A2K8SZR7	Unknown	2
A0A2K8T0D2	Unknown	2
A0A2K8T0M1	Unknown	2
A0A2K8T0M2	Unknown	2
A0A2K8T0U7	Unknown	5.41
A0A2K8T196	Unknown	2
A0A2K8T1W7	Unknown	2.5
A0A2K8T213	Unknown	2
A0A2K8T2I5	Unknown	2
A0A2K8T313	Unknown	2
A0A2K8T4N3	Unknown	2
A0A2K8T4Q3	Unknown	4.94
A0A2K8T4Y8	Unknown	2
A0A2K8T533	Unknown	2
A0A2K8T5D9	Unknown	2
A0A2K8T5V6	Unknown	2
A0A2K8T620	Unknown	2
A0A2K8T707	Unknown	2
A0A2K8T760	Unknown	5.41
A0A2K8T7S0	Unknown	2
A0A2K8T8Q6	Unknown	2
A0A2K8T8Z9	Unknown	2
A0A2K8T9M3	Unknown	2
A0A2K8TA49	Unknown	2
A0A2K8TAJ5	Unknown	2
A0A2K8TB18	Unknown	2
D4NZI3	Unknown	2
E7DPV4	Unknown	2
E7DPV6	Unknown	2
E7DPV7	Unknown	2.5

## Sheet: Table S4
Table S4: Detailed list of malonylated protein secondary structure and surface accessibility predictions in N. flagelliforme.
Class assignment - B for buried or E for Exposed - Threshold: 25% exposure, but not based on RSA	Amino acid	Sequence name	Amino acid number	Relative Surface Accessibility - RSA	Absolute Surface Accessibility	Z-fit score for RSA prediction	Probability for Alpha-Helix	Probability for Beta-strand	Probability for Coil
B	K	A0A1L5SMA2	38	0.207	42.6	1.522	0.859	0.002	0.139
E	K	A0A1L5SMA2	53	0.466	95.815	-0.101	0.113	0.043	0.844
B	K	A0A1L5SMA2	70	0.043	8.886	1.186	0.001	0.959	0.04
E	K	A0A1L5SMA2	79	0.66	135.824	0.948	0.782	0.003	0.215
B	K	A0A1L5SMA2	89	0.205	42.086	0.459	0.406	0.004	0.591
B	K	A0A1L5SMA2	159	0.271	55.765	0.316	0.923	0.002	0.076
B	K	A0A1L5SMA2	183	0.073	15.037	0.568	0.97	0.001	0.029
E	K	A0A1L5SMA2	205	0.262	53.811	0.681	0.923	0.002	0.076
E	K	A0A1L5SMA2	237	0.522	107.314	-0.559	0.406	0.004	0.591
E	K	A0A1L5SMA2	249	0.262	53.914	-0.497	0.782	0.003	0.215
E	K	A0A1L5SMA2	262	0.328	67.428	0.346	0.321	0.003	0.675
E	K	A0A1L5SMA2	295	0.415	85.427	0.587	0.339	0.016	0.645
E	K	A0A1L5SMA2	303	0.451	92.791	0.288	0.66	0.049	0.291
E	K	A0A1L5SMA2	311	0.582	119.615	-1.236	0.058	0.017	0.925
E	K	A0A1L5SMA2	317	0.608	125.024	1.132	0.859	0.002	0.139
E	K	A0A1L5SMA2	322	0.245	50.417	1.318	0.97	0.001	0.029
B	K	A0A1L5SMA2	331	0.084	17.279	0.047	0.988	0	0.012
E	K	A0A1L5SMA2	347	0.695	142.9	0.701	0.694	0.003	0.303
E	K	A0A1L5SMA2	363	0.362	74.402	0.029	0.522	0.016	0.462
E	K	A0A1L5SMA2	375	0.273	56.177	1.642	0.97	0.001	0.029
B	K	A0A1L5SMA2	377	0.206	42.374	1.223	0.988	0	0.012
E	K	A0A1L5SMA2	378	0.539	110.79	2.164	0.988	0	0.012
B	K	A0A1L5SMA2	396	0.246	50.664	1.051	0.97	0.001	0.029
E	K	A0A1L5SMA2	460	0.551	113.361	0.303	0.018	0.047	0.935
E	K	A0A1L5SMA2	475	0.602	123.749	-0.382	0.052	0.084	0.864
E	K	A0A1L5SMA2	476	0.886	182.291	0.821	0.003	0.003	0.994
E	K	A0A2K8SFV9	9	0.396	81.519	1.355	0.831	0.044	0.125
E	K	A0A2K8SFV9	13	0.242	49.821	0.604	0.231	0.33	0.439
E	K	A0A2K8SFV9	15	0.552	113.629	1.316	0.079	0.592	0.329
E	K	A0A2K8SFV9	38	0.656	134.96	0.318	0.522	0.016	0.462
E	K	A0A2K8SFV9	72	0.414	85.263	1.124	0.001	0.9	0.099
B	K	A0A2K8SFV9	74	0.102	20.94	1.232	0.001	0.959	0.04
E	K	A0A2K8SFV9	89	0.65	133.705	-0.034	0.802	0.014	0.185
E	K	A0A2K8SFV9	150	0.342	70.432	-0.19	0.024	0.655	0.322
E	K	A0A2K8SFV9	154	0.433	89.048	-0.59	0.018	0.141	0.84
E	K	A0A2K8SFV9	158	0.692	142.262	0.404	0.018	0.019	0.964
E	K	A0A2K8SFV9	168	0.438	89.994	-0.438	0.005	0.045	0.951
E	K	A0A2K8SFV9	182	0.502	103.323	-0.859	0.113	0.087	0.8
E	K	A0A2K8SFV9	202	0.51	104.866	1.547	0.859	0.002	0.139
E	K	A0A2K8SFV9	221	0.327	67.161	-0.003	0.087	0.683	0.23
E	K	A0A2K8SFV9	229	0.411	84.543	-0.009	0.649	0.163	0.188
B	K	A0A2K8SFV9	236	0.113	23.244	0.185	0.717	0.014	0.269
E	K	A0A2K8SFV9	261	0.434	89.233	-0.309	0.246	0.004	0.75
B	K	A0A2K8SFV9	267	0.189	38.939	0.541	0.97	0.001	0.029
E	K	A0A2K8SFV9	278	0.317	65.289	1.092	0.988	0	0.012
B	K	A0A2K8SFV9	283	0.231	47.496	-0.069	0.694	0.003	0.303
E	K	A0A2K8SFV9	294	0.488	100.443	-0.028	0.257	0.016	0.727
E	K	A0A2K8SFV9	301	0.272	55.909	0.085	0.649	0.163	0.188
E	K	A0A2K8SFV9	302	0.419	86.168	0.382	0.502	0.102	0.396
E	K	A0A2K8SFV9	329	0.283	58.295	0.862	0.97	0.001	0.029
E	K	A0A2K8SFV9	344	0.591	121.528	0.98	0.923	0.002	0.076
B	K	A0A2K8SFV9	361	0.207	42.642	0.17	0.622	0.015	0.363
E	K	A0A2K8SFV9	391	0.426	87.71	0.657	0.321	0.003	0.675
E	K	A0A2K8SFV9	417	0.276	56.732	0.364	0.522	0.016	0.462
E	K	A0A2K8SFV9	436	0.555	114.266	-0.139	0.184	0.043	0.773
E	K	A0A2K8SFV9	471	0.453	93.244	1.523	0.859	0.002	0.139
E	K	A0A2K8SFV9	481	0.634	130.332	0.956	0.717	0.014	0.269
E	K	A0A2K8SG09	16	0.398	81.889	-0.319	0.053	0.004	0.942
E	K	A0A2K8SG09	21	0.692	142.324	0.633	0.113	0.043	0.844
E	K	A0A2K8SG09	76	0.333	68.539	0.549	0.923	0.002	0.076
E	K	A0A2K8SG09	81	0.499	102.644	1.716	0.021	0.279	0.699
E	K	A0A2K8SG09	93	0.261	53.647	1.263	0.018	0.088	0.893
E	K	A0A2K8SG09	97	0.568	116.755	0.839	0.018	0.047	0.935
E	K	A0A2K8SG09	112	0.348	71.584	-1.492	0.018	0.019	0.964
E	K	A0A2K8SG09	135	0.5	102.809	1.391	0.923	0.002	0.076
E	K	A0A2K8SG09	172	0.338	69.568	0.787	0.923	0.002	0.076
B	K	A0A2K8SG09	195	0.101	20.837	1.274	0.97	0.001	0.029
E	K	A0A2K8SG09	241	0.509	104.763	1.991	0.97	0.001	0.029
E	K	A0A2K8SG09	273	0.648	133.376	0.321	0.018	0.019	0.964
E	K	A0A2K8SG09	279	0.24	49.389	1.216	0.923	0.002	0.076
E	K	A0A2K8SG09	281	0.344	70.864	1.556	0.923	0.002	0.076
E	K	A0A2K8SG09	288	0.576	118.463	0.834	0.406	0.004	0.591
E	K	A0A2K8SG38	3	0.336	69.177	0.288	0.022	0.552	0.426
B	K	A0A2K8SG38	5	0.255	52.412	0.3	0.072	0.855	0.073
E	K	A0A2K8SG38	47	0.451	92.853	0.236	0.184	0.043	0.773
E	K	A0A2K8SG38	54	0.423	86.97	-0.286	0.02	0.205	0.775
E	K	A0A2K8SG38	56	0.402	82.712	-0.583	0.004	0.42	0.576
E	K	A0A2K8SG38	58	0.339	69.815	0.409	0.003	0.718	0.279
E	K	A0A2K8SG38	62	0.544	112.004	-0.468	0.004	0.42	0.576
E	K	A0A2K8SG38	88	0.679	139.67	-0.655	0.113	0.043	0.844
E	K	A0A2K8SG38	112	0.685	140.843	0.26	0.522	0.016	0.462
E	K	A0A2K8SG38	116	0.329	67.675	0.992	0.004	0.336	0.66
E	K	A0A2K8SG38	125	0.435	89.5	-0.37	0.018	0.047	0.935
E	K	A0A2K8SG38	146	0.316	65.063	0.626	0.018	0.047	0.935
E	K	A0A2K8SG38	165	0.213	43.773	0.415	0.751	0.05	0.199
E	K	A0A2K8SG38	196	0.469	96.412	-0.544	0.058	0.017	0.925
E	K	A0A2K8SG38	197	0.553	113.752	-0.784	0.058	0.017	0.925
E	K	A0A2K8SG38	218	0.357	73.373	1.121	0.923	0.002	0.076
E	K	A0A2K8SG38	228	0.691	142.221	0.167	0.018	0.019	0.964
E	K	A0A2K8SG38	230	0.367	75.43	0.207	0.021	0.279	0.699
B	K	A0A2K8SG38	251	0.171	35.154	0.711	0.001	0.959	0.04
E	K	A0A2K8SG38	254	0.471	96.946	0.351	0.004	0.138	0.858
E	K	A0A2K8SG38	259	0.626	128.727	-0.559	0.923	0.002	0.076
E	K	A0A2K8SG38	266	0.363	74.669	1.323	0.97	0.001	0.029
B	K	A0A2K8SG38	312	0.092	18.904	1.595	0.001	0.959	0.04
E	K	A0A2K8SG38	337	0.321	65.968	0.857	0.502	0.002	0.495
E	K	A0A2K8SG38	339	0.616	126.773	0.128	0.257	0.016	0.727
E	K	A0A2K8SGF7	9	0.415	85.386	1.212	0.021	0.452	0.528
E	K	A0A2K8SGF7	29	0.484	99.579	-0.114	0.353	0.048	0.598
E	K	A0A2K8SGF7	49	0.391	80.429	-0.176	0.622	0.015	0.363
B	K	A0A2K8SGF7	56	0.203	41.819	0.777	0.97	0.001	0.029
E	K	A0A2K8SGF7	62	0.638	131.175	-0.477	0.782	0.003	0.215
E	K	A0A2K8SGF7	63	0.481	98.88	0.416	0.717	0.014	0.269
E	K	A0A2K8SGF7	85	0.645	132.697	-0.139	0.113	0.043	0.844
E	K	A0A2K8SGI3	12	0.437	89.87	0.735	0.487	0.37	0.143
E	K	A0A2K8SGI3	56	0.351	72.304	0.299	0.66	0.049	0.291
B	K	A0A2K8SGI3	60	0.259	53.235	0.142	0.278	0.093	0.628
E	K	A0A2K8SGI3	75	0.422	86.847	0.35	0.701	0.107	0.192
B	K	A0A2K8SGI3	106	0.284	58.522	0.029	0.694	0.003	0.303
E	K	A0A2K8SGI3	130	0.527	108.445	-0.473	0.052	0.084	0.864
E	K	A0A2K8SGI3	177	0.466	95.856	-0.245	0.622	0.015	0.363
E	K	A0A2K8SGI3	186	0.617	126.979	1.342	0.018	0.047	0.935
B	K	A0A2K8SGI3	188	0.227	46.714	1.445	0.004	0.197	0.799
E	K	A0A2K8SGI3	209	0.661	135.906	1.48	0.878	0.01	0.111
E	K	A0A2K8SGI3	213	0.371	76.274	2.073	0.024	0.655	0.322
E	K	A0A2K8SGI3	223	0.521	107.108	1.564	0.522	0.016	0.462
E	K	A0A2K8SGI3	231	0.451	92.668	1.647	0.003	0.718	0.279
E	K	A0A2K8SGI3	249	0.515	105.977	1.663	0.018	0.019	0.964
B	K	A0A2K8SGI3	298	0.294	60.476	-2.116	0.018	0.047	0.935
B	K	A0A2K8SGI3	301	0.252	51.898	-0.088	0.004	0.336	0.66
B	K	A0A2K8SGI3	324	0.113	23.182	0.54	0.97	0.001	0.029
B	K	A0A2K8SGI3	334	0.135	27.77	0.772	0.923	0.002	0.076
B	K	A0A2K8SGI3	344	0.034	6.932	0.552	0.001	0.9	0.099
E	K	A0A2K8SGI3	351	0.456	93.737	0.181	0.064	0.216	0.721
E	K	A0A2K8SGI3	395	0.407	83.761	0.164	0.97	0.001	0.029
E	K	A0A2K8SGI3	411	0.576	118.442	0.314	0.109	0.005	0.886
E	K	A0A2K8SGU2	65	0.418	86.065	-0.383	0.052	0.084	0.864
E	K	A0A2K8SGU2	83	0.542	111.592	0.584	0.021	0.279	0.699
E	K	A0A2K8SGU2	93	0.413	84.892	1.209	0.001	0.9	0.099
E	K	A0A2K8SGU2	106	0.378	77.693	0.469	0.021	0.279	0.699
E	K	A0A2K8SGU2	135	0.422	86.723	-0.811	0.056	0.142	0.802
E	K	A0A2K8SGU2	157	0.305	62.677	-0.077	0.191	0.086	0.723
E	K	A0A2K8SGU2	170	0.496	101.965	-1.167	0.113	0.043	0.844
B	K	A0A2K8SGU2	178	0.146	30.094	-0.124	0.003	0.718	0.279
E	K	A0A2K8SGU2	216	0.392	80.532	0.205	0.018	0.141	0.84
E	K	A0A2K8SGU2	251	0.529	108.774	-0.502	0.184	0.043	0.773
E	K	A0A2K8SGU2	259	0.307	63.253	-0.433	0.191	0.086	0.723
E	K	A0A2K8SGU2	260	0.495	101.76	0	0.125	0.227	0.648
E	K	A0A2K8SGU2	283	0.409	84.09	1.313	0.561	0.047	0.393
E	K	A0A2K8SGU2	315	0.413	84.995	1.301	0.923	0.002	0.076
E	K	A0A2K8SGU2	323	0.343	70.576	0.027	0.018	0.047	0.935
E	K	A0A2K8SGU2	324	0.368	75.8	0.314	0.004	0.263	0.733
B	K	A0A2K8SGU2	332	0.135	27.831	0.045	0.02	0.205	0.775
E	K	A0A2K8SGU2	349	0.46	94.601	-1.125	0.522	0.016	0.462
E	K	A0A2K8SGU2	363	0.518	106.47	1.345	0.923	0.002	0.076
E	K	A0A2K8SGU2	384	0.317	65.248	1.673	0.97	0.001	0.029
E	K	A0A2K8SGU2	414	0.449	92.339	-1.836	0.113	0.043	0.844
E	K	A0A2K8SGU2	424	0.403	82.918	-0.832	0.064	0.216	0.721
B	K	A0A2K8SGU2	455	0.223	45.851	0.271	0.113	0.043	0.844
E	K	A0A2K8SGU2	462	0.602	123.811	-0.057	0.184	0.043	0.773
E	K	A0A2K8SGU2	471	0.387	79.647	-1.298	0.191	0.086	0.723
E	K	A0A2K8SGU2	486	0.433	89.109	-1.279	0.053	0.043	0.903
E	K	A0A2K8SGU2	522	0.519	106.676	-1.171	0.018	0.019	0.964
E	K	A0A2K8SGU2	550	0.45	92.503	0.363	0.649	0.163	0.188
E	K	A0A2K8SGU2	584	0.382	78.639	-1.522	0.018	0.047	0.935
E	K	A0A2K8SGU2	595	0.472	97.029	-0.632	0.016	0.005	0.979
B	K	A0A2K8SGU2	597	0.215	44.246	1.143	0.216	0.235	0.548
E	K	A0A2K8SGU2	629	0.345	70.925	-0.733	0.004	0.616	0.381
B	K	A0A2K8SGU2	630	0.238	48.998	-0.468	0.002	0.816	0.182
E	K	A0A2K8SGU2	634	0.304	62.595	0.539	0.002	0.816	0.182
E	K	A0A2K8SGU2	669	0.424	87.258	-1.38	0.052	0.084	0.864
E	K	A0A2K8SGU2	670	0.351	72.16	-1.172	0.064	0.216	0.721
E	K	A0A2K8SGU2	673	0.303	62.409	-0.055	0.022	0.552	0.426
E	K	A0A2K8SGU2	678	0.399	81.992	-1.089	0.052	0.084	0.864
B	K	A0A2K8SGU2	687	0.245	50.396	-1.979	0.022	0.359	0.619
B	K	A0A2K8SGU2	707	0.318	65.495	-1.751	0.018	0.047	0.935
E	K	A0A2K8SGU2	725	0.376	77.343	-2.41	0.018	0.019	0.964
E	K	A0A2K8SGU2	761	0.307	63.109	-1.708	0.064	0.216	0.721
E	K	A0A2K8SGU2	781	0.291	59.776	-0.312	0.021	0.452	0.528
E	K	A0A2K8SGU2	811	0.41	84.337	-0.628	0.018	0.088	0.893
E	K	A0A2K8SGU2	905	0.366	75.307	-1.046	0.004	0.085	0.91
B	K	A0A2K8SGU2	967	0.275	56.609	-0.348	0.02	0.205	0.775
E	K	A0A2K8SGU2	979	0.243	50.067	1.369	0.002	0.816	0.182
B	K	A0A2K8SGU2	1002	0.225	46.2	-0.645	0.002	0.816	0.182
E	K	A0A2K8SGX5	5	0.403	82.959	0.987	0.079	0.592	0.329
E	K	A0A2K8SGX5	34	0.473	97.399	1.604	0.022	0.359	0.619
E	K	A0A2K8SGX5	63	0.494	101.575	-0.751	0.004	0.085	0.91
E	K	A0A2K8SGX5	64	0.356	73.25	-0.286	0.004	0.42	0.576
E	K	A0A2K8SGX5	79	0.476	97.975	0.102	0.018	0.047	0.935
E	K	A0A2K8SGX5	141	0.622	127.966	-1.093	0.113	0.043	0.844
E	K	A0A2K8SGX5	159	0.364	74.978	1.047	0.022	0.359	0.619
E	K	A0A2K8SGX5	163	0.574	118.072	0.368	0.002	0.816	0.182
E	K	A0A2K8SGX5	171	0.297	61.134	0.466	0.001	0.9	0.099
E	K	A0A2K8SGX5	186	0.462	95.054	0.776	0.004	0.514	0.481
E	K	A0A2K8SGX5	201	0.484	99.641	0.123	0.191	0.086	0.723
E	K	A0A2K8SGX5	209	0.574	118.154	-0.446	0.113	0.087	0.8
E	K	A0A2K8SGX5	229	0.431	88.677	0.279	0.004	0.42	0.576
E	K	A0A2K8SGX5	240	0.374	76.87	1.173	0.001	0.9	0.099
E	K	A0A2K8SGX5	241	0.461	94.787	1.04	0.001	0.9	0.099
E	K	A0A2K8SGX8	5	0.368	75.718	0.897	0.159	0.516	0.325
E	K	A0A2K8SGX8	6	0.308	63.314	1.583	0.273	0.587	0.14
E	K	A0A2K8SGX8	18	0.338	69.465	1.817	0.97	0.001	0.029
E	K	A0A2K8SGX8	25	0.655	134.672	1.692	0.782	0.003	0.215
E	K	A0A2K8SGX8	40	0.53	109.083	-0.026	0.018	0.141	0.84
E	K	A0A2K8SGX8	69	0.452	92.997	2.04	0.923	0.002	0.076
E	K	A0A2K8SGX8	76	0.354	72.838	1.635	0.859	0.002	0.139
E	K	A0A2K8SGX8	81	0.511	105.072	0.587	0.43	0.016	0.555
E	K	A0A2K8SGZ6	12	0.577	118.586	0.111	0.113	0.043	0.844
E	K	A0A2K8SGZ6	28	0.67	137.778	0.192	0.018	0.088	0.893
E	K	A0A2K8SGZ6	41	0.556	114.369	1.075	0.97	0.001	0.029
E	K	A0A2K8SGZ6	65	0.571	117.475	0.208	0.406	0.004	0.591
E	K	A0A2K8SGZ6	82	0.305	62.656	1.42	0.988	0	0.012
E	K	A0A2K8SGZ6	119	0.355	73.126	0.724	0.053	0.043	0.903
E	K	A0A2K8SGZ6	124	0.614	126.279	1.682	0.97	0.001	0.029
B	K	A0A2K8SGZ6	134	0.161	33.159	0.813	0.938	0.007	0.055
E	K	A0A2K8SHB5	4	0.545	112.045	0.575	0.022	0.359	0.619
E	K	A0A2K8SHB5	6	0.348	71.645	1.077	0.002	0.816	0.182
B	K	A0A2K8SHB5	80	0.207	42.6	0.329	0.002	0.816	0.182
E	K	A0A2K8SHB5	89	0.653	134.404	-1.587	0.005	0.015	0.979
E	K	A0A2K8SHB5	91	0.298	61.278	0.269	0.004	0.514	0.481
E	K	A0A2K8SHB5	112	0.42	86.353	0.981	0.191	0.086	0.723
E	K	A0A2K8SHB5	122	0.407	83.679	-1.243	0.268	0.043	0.689
E	K	A0A2K8SHB5	154	0.522	107.293	0.391	0.056	0.142	0.802
E	K	A0A2K8SHE4	13	0.691	142.118	1.343	0.859	0.002	0.139
E	K	A0A2K8SHE4	16	0.289	59.509	1.883	0.938	0.007	0.055
E	K	A0A2K8SHE4	40	0.298	61.278	-0.138	0.717	0.014	0.269
E	K	A0A2K8SHE4	47	0.482	99.209	-1.142	0.353	0.048	0.598
E	K	A0A2K8SHE4	48	0.462	95.033	-0.472	0.278	0.093	0.628
E	K	A0A2K8SHE4	59	0.429	88.266	-0.241	0.018	0.019	0.964
E	K	A0A2K8SHE4	61	0.567	116.529	-0.002	0.005	0.015	0.979
E	K	A0A2K8SHE4	65	0.305	62.759	0.191	0.97	0.001	0.029
E	K	A0A2K8SHE4	119	0.542	111.489	-0.694	0.181	0.017	0.803
E	K	A0A2K8SHE4	120	0.536	110.358	-0.187	0.502	0.002	0.495
E	K	A0A2K8SHE4	129	0.412	84.687	-0.769	0.455	0.046	0.498
E	K	A0A2K8SHE4	153	0.517	106.409	-0.951	0.268	0.043	0.689
E	K	A0A2K8SHE4	157	0.406	83.596	-0.534	0.199	0.152	0.649
E	K	A0A2K8SHE4	162	0.45	92.483	-0.655	0.066	0.296	0.638
E	K	A0A2K8SHE4	165	0.421	86.682	-0.758	0.018	0.141	0.84
B	K	A0A2K8SHE4	169	0.148	30.361	0.464	0.003	0.718	0.279
B	K	A0A2K8SHE4	179	0.164	33.817	-0.265	0.004	0.138	0.858
B	K	A0A2K8SHE4	192	0.29	59.571	-0.558	0.268	0.043	0.689
E	K	A0A2K8SHE4	208	0.593	121.898	-1.973	0.018	0.047	0.935
E	K	A0A2K8SHE4	210	0.311	63.993	0.061	0.004	0.616	0.381
E	K	A0A2K8SHE4	212	0.315	64.734	-0.378	0.002	0.816	0.182
E	K	A0A2K8SHE4	228	0.408	83.946	-0.735	0.069	0.386	0.545
E	K	A0A2K8SHE4	234	0.606	124.654	-0.645	0.018	0.019	0.964
E	K	A0A2K8SHE4	240	0.541	111.222	0.02	0.923	0.002	0.076
E	K	A0A2K8SHE4	241	0.476	98.016	0.435	0.923	0.002	0.076
E	K	A0A2K8SHE4	244	0.438	90.055	1.264	0.97	0.001	0.029
E	K	A0A2K8SHE4	261	0.311	64.014	0.369	0.802	0.014	0.185
E	K	A0A2K8SHE4	275	0.658	135.412	0.781	0.6	0.003	0.397
E	K	A0A2K8SHE4	276	0.304	62.451	1.191	0.694	0.003	0.303
E	K	A0A2K8SHH5	6	0.57	117.208	0.752	0.802	0.014	0.185
E	K	A0A2K8SHH5	10	0.548	112.765	0.132	0.802	0.014	0.185
E	K	A0A2K8SHH5	11	0.392	80.634	0.661	0.717	0.014	0.269
E	K	A0A2K8SHH5	12	0.544	111.901	0.226	0.522	0.016	0.462
E	K	A0A2K8SHH5	14	0.525	108.054	-0.061	0.109	0.005	0.886
E	K	A0A2K8SHH5	20	0.523	107.602	0.509	0.053	0.043	0.903
B	K	A0A2K8SHH5	26	0.21	43.197	0.811	0.97	0.001	0.029
B	K	A0A2K8SHH5	60	0.22	45.213	0.966	0.95	0.028	0.022
E	K	A0A2K8SHH5	69	0.612	125.909	0.422	0.717	0.014	0.269
E	K	A0A2K8SHH5	70	0.661	135.968	0.996	0.522	0.016	0.462
E	K	A0A2K8SHL1	5	0.381	78.289	0.339	0.018	0.047	0.935
B	K	A0A2K8SHL1	26	0.134	27.543	0.471	0.003	0.718	0.279
B	K	A0A2K8SHL1	82	0.128	26.33	0.995	0.003	0.718	0.279
E	K	A0A2K8SHL1	168	0.55	113.238	0.347	0.005	0.015	0.979
B	K	A0A2K8SHL1	184	0.09	18.431	0.857	0.001	0.959	0.04
E	K	A0A2K8SHL1	283	0.397	81.704	-0.15	0.005	0.045	0.951
E	K	A0A2K8SHL1	333	0.246	50.643	0.115	0.004	0.197	0.799
B	K	A0A2K8SHL1	336	0.175	35.956	1.217	0.004	0.514	0.481
E	K	A0A2K8SHL1	356	0.425	87.422	0.137	0.003	0.718	0.279
E	K	A0A2K8SHL1	381	0.63	129.509	-0.561	0.003	0.003	0.994
B	K	A0A2K8SHL1	386	0.159	32.645	1.19	0.001	0.959	0.04
E	K	A0A2K8SHL1	393	0.682	140.267	0.682	0.003	0.003	0.994
E	K	A0A2K8SHN4	3	0.286	58.912	1.309	0.003	0.718	0.279
E	K	A0A2K8SHN4	27	0.308	63.397	0.849	0.004	0.514	0.481
E	K	A0A2K8SHN4	31	0.476	97.995	0.726	0.003	0.003	0.994
E	K	A0A2K8SHN4	65	0.257	52.865	1.587	0.004	0.616	0.381
E	K	A0A2K8SHN4	123	0.407	83.761	1.211	0.923	0.002	0.076
E	K	A0A2K8SHN4	139	0.616	126.629	-0.992	0.018	0.047	0.935
E	K	A0A2K8SHN4	140	0.232	47.64	1.192	0.018	0.088	0.893
E	K	A0A2K8SHN4	149	0.374	76.891	0.144	0.622	0.015	0.363
E	K	A0A2K8SHN4	159	0.497	102.171	0.918	0.859	0.002	0.139
E	K	A0A2K8SHN4	164	0.408	83.843	1.628	0.001	0.9	0.099
B	K	A0A2K8SHN4	203	0.251	51.651	-0.742	0.018	0.019	0.964
E	K	A0A2K8SHN4	218	0.461	94.745	1.737	0.694	0.003	0.303
E	K	A0A2K8SHN4	220	0.445	91.516	0.86	0.016	0.005	0.979
E	K	A0A2K8SHN4	244	0.601	123.667	1.634	0.859	0.002	0.139
E	K	A0A2K8SHN4	247	0.38	78.063	1.673	0.053	0.043	0.903
E	K	A0A2K8SHN4	271	0.616	126.793	0.462	0.003	0.003	0.994
E	K	A0A2K8SHN4	325	0.341	70.061	0.714	0.353	0.048	0.598
B	K	A0A2K8SHN4	361	0.248	50.993	-0.48	0.353	0.048	0.598
E	K	A0A2K8SHN4	371	0.354	72.736	1.305	0.717	0.014	0.269
E	K	A0A2K8SHN4	392	0.564	115.974	1.334	0.268	0.505	0.227
E	K	A0A2K8SHN4	452	0.382	78.536	-0.656	0.005	0.045	0.951
E	K	A0A2K8SHN4	468	0.366	75.348	0.709	0.97	0.001	0.029
E	K	A0A2K8SHN4	488	0.599	123.111	0.025	0.052	0.084	0.864
E	K	A0A2K8SHN4	514	0.766	157.669	1.676	0.6	0.003	0.397
E	K	A0A2K8SHV3	4	0.463	95.321	0.521	0.649	0.163	0.188
E	K	A0A2K8SHV3	11	0.293	60.332	0.144	0.938	0.007	0.055
B	K	A0A2K8SHV3	18	0.255	52.433	0.12	0.975	0.003	0.022
E	K	A0A2K8SHV3	25	0.35	72.057	0.338	0.859	0.002	0.139
B	K	A0A2K8SHV3	32	0.27	55.457	0.187	0.938	0.007	0.055
E	K	A0A2K8SHV3	39	0.377	77.446	0.306	0.802	0.014	0.185
E	K	A0A2K8SHV3	46	0.471	96.988	0.215	0.352	0.332	0.316
E	K	A0A2K8SHV3	67	0.515	106.038	0.168	0.184	0.043	0.773
E	K	A0A2K8SI26	3	0.468	96.268	1.035	0.003	0.718	0.279
B	K	A0A2K8SI26	11	0.278	57.226	1.048	0.011	0.918	0.071
E	K	A0A2K8SI26	16	0.678	139.403	0.532	0.004	0.085	0.91
E	K	A0A2K8SI26	21	0.477	98.139	0.584	0.004	0.42	0.576
B	K	A0A2K8SI26	43	0.133	27.296	0.072	0.782	0.003	0.215
E	K	A0A2K8SI26	62	0.273	56.115	1.685	0.001	0.959	0.04
B	K	A0A2K8SI26	71	0.207	42.683	0.928	0.018	0.047	0.935
E	K	A0A2K8SI26	102	0.477	98.078	1.008	0.455	0.046	0.498
E	K	A0A2K8SI26	104	0.542	111.572	1.055	0.053	0.043	0.903
E	K	A0A2K8SI26	105	0.771	158.636	0.596	0.018	0.019	0.964
E	K	A0A2K8SI26	112	0.438	90.055	2.046	0.97	0.001	0.029
E	K	A0A2K8SI26	131	0.382	78.598	1.054	0.116	0.016	0.868
E	K	A0A2K8SI26	178	0.349	71.83	2.125	0.988	0	0.012
E	K	A0A2K8SI26	185	0.56	115.233	0.417	0.018	0.019	0.964
B	K	A0A2K8SI26	204	0.175	36.039	0.664	0.159	0.516	0.325
E	K	A0A2K8SI26	248	0.47	96.782	0.566	0.003	0.718	0.279
B	K	A0A2K8SIL4	136	0.283	58.131	-1.11	0.018	0.088	0.893
E	K	A0A2K8SIL4	665	0.345	70.905	-0.689	0.022	0.359	0.619
E	K	A0A2K8SIL4	686	0.343	70.473	-1.163	0.02	0.205	0.775
B	K	A0A2K8SIL4	715	0.298	61.401	-1.6	0.056	0.142	0.802
B	K	A0A2K8SIL8	28	0.1	20.611	1.683	0.97	0.001	0.029
B	K	A0A2K8SIL8	33	0.244	50.109	2.087	0.97	0.001	0.029
E	K	A0A2K8SIL8	38	0.306	62.985	0.218	0.016	0.005	0.979
E	K	A0A2K8SIL8	59	0.347	71.481	-1.618	0.184	0.043	0.773
E	K	A0A2K8SIL8	178	0.45	92.647	-0.352	0.02	0.205	0.775
E	K	A0A2K8SIL8	187	0.548	112.641	0.29	0.004	0.336	0.66
E	K	A0A2K8SIL8	238	0.314	64.61	1.611	0.97	0.001	0.029
E	K	A0A2K8SIL8	245	0.305	62.8	1.936	0.97	0.001	0.029
E	K	A0A2K8SIL8	259	0.333	68.498	1.234	0.004	0.616	0.381
B	K	A0A2K8SIL8	278	0.209	42.93	1.605	0.923	0.002	0.076
E	K	A0A2K8SIL8	394	0.292	60.064	1.339	0.923	0.002	0.076
E	K	A0A2K8SIL8	412	0.421	86.62	-0.27	0.181	0.017	0.803
E	K	A0A2K8SIM9	5	0.319	65.557	1.095	0.085	0.775	0.14
E	K	A0A2K8SIM9	35	0.521	107.108	1.577	0.02	0.205	0.775
E	K	A0A2K8SIM9	64	0.456	93.758	-0.561	0.004	0.197	0.799
E	K	A0A2K8SIM9	65	0.395	81.169	-0.191	0.004	0.336	0.66
E	K	A0A2K8SIM9	185	0.359	73.846	0.59	0.066	0.296	0.638
E	K	A0A2K8SIM9	189	0.539	110.872	0.302	0.022	0.552	0.426
E	K	A0A2K8SIM9	197	0.344	70.74	0.465	0.001	0.9	0.099
E	K	A0A2K8SIM9	267	0.479	98.592	0.994	0.001	0.9	0.099
E	K	A0A2K8SIM9	278	0.28	57.534	0.646	0.002	0.816	0.182
E	K	A0A2K8SIV5	4	0.589	121.157	0.415	0.018	0.088	0.893
E	K	A0A2K8SIV5	8	0.5	102.788	0.367	0.018	0.047	0.935
E	K	A0A2K8SIV5	12	0.398	81.951	-0.192	0.859	0.002	0.139
E	K	A0A2K8SIV5	41	0.526	108.28	-0.214	0.113	0.087	0.8
E	K	A0A2K8SIV5	51	0.46	94.663	0.246	0.064	0.216	0.721
E	K	A0A2K8SIV5	55	0.501	103.015	-0.187	0.003	0.718	0.279
E	K	A0A2K8SIV5	56	0.454	93.326	0.553	0.001	0.9	0.099
E	K	A0A2K8SIV5	89	0.582	119.759	1.795	0.02	0.205	0.775
E	K	A0A2K8SIV5	93	0.485	99.764	1.909	0.022	0.359	0.619
E	K	A0A2K8SIV5	95	0.569	117.126	1.607	0.022	0.552	0.426
E	K	A0A2K8SIV5	108	0.409	84.111	0.49	0.859	0.002	0.139
E	K	A0A2K8SIV5	111	0.466	95.938	-0.057	0.923	0.002	0.076
E	K	A0A2K8SIV5	121	0.486	99.97	0.361	0.97	0.001	0.029
E	K	A0A2K8SIV5	126	0.454	93.408	1.054	0.97	0.001	0.029
E	K	A0A2K8SIV5	131	0.521	107.108	1.119	0.802	0.014	0.185
E	K	A0A2K8SIV5	135	0.563	115.891	0.419	0.321	0.003	0.675
E	K	A0A2K8SIV5	143	0.469	96.576	0.287	0.859	0.002	0.139
E	K	A0A2K8SIV5	204	0.687	141.398	0.442	0.802	0.014	0.185
B	K	A0A2K8SIV5	216	0.225	46.221	0.397	0.923	0.002	0.076
E	K	A0A2K8SIV5	224	0.352	72.406	0.365	0.923	0.002	0.076
E	K	A0A2K8SIV5	231	0.421	86.517	0.653	0.97	0.001	0.029
E	K	A0A2K8SIV5	243	0.561	115.501	0.276	0.97	0.001	0.029
E	K	A0A2K8SIV5	249	0.511	105.154	0.43	0.97	0.001	0.029
E	K	A0A2K8SIV5	261	0.524	107.766	0.444	0.97	0.001	0.029
E	K	A0A2K8SIV5	267	0.448	92.092	0.444	0.97	0.001	0.029
E	K	A0A2K8SIV5	296	0.581	119.512	1.69	0.97	0.001	0.029
E	K	A0A2K8SIV5	308	0.302	62.101	1.784	0.011	0.918	0.071
E	K	A0A2K8SIV5	317	0.447	91.927	0.84	0.001	0.959	0.04
E	K	A0A2K8SIV5	325	0.355	73.023	0.155	0.022	0.552	0.426
E	K	A0A2K8SIV5	353	0.469	96.535	1.562	0.118	0.15	0.732
E	K	A0A2K8SIV5	355	0.424	87.299	1.423	0.064	0.216	0.721
E	K	A0A2K8SIV5	359	0.548	112.641	1.654	0.004	0.616	0.381
E	K	A0A2K8SIV5	370	0.582	119.759	0.81	0.003	0.718	0.279
E	K	A0A2K8SIV5	404	0.281	57.884	2.091	0.001	0.959	0.04
E	K	A0A2K8SIV5	410	0.761	156.517	0.312	0.058	0.017	0.925
E	K	A0A2K8SIV5	413	0.593	121.939	-0.217	0.113	0.043	0.844
E	K	A0A2K8SJ00	4	0.48	98.777	0.746	0.024	0.655	0.322
E	K	A0A2K8SJ00	10	0.38	78.187	0.694	0.011	0.918	0.071
E	K	A0A2K8SJ00	24	0.552	113.608	0.475	0.184	0.043	0.773
E	K	A0A2K8SJ00	25	0.35	72.057	-0.063	0.118	0.15	0.732
E	K	A0A2K8SJ00	45	0.493	101.451	0.528	0.561	0.047	0.393
E	K	A0A2K8SJ00	49	0.392	80.634	1.144	0.878	0.01	0.111
E	K	A0A2K8SJ00	67	0.508	104.578	0.427	0.278	0.093	0.628
E	K	A0A2K8SJ00	70	0.497	102.295	0.01	0.199	0.152	0.649
E	K	A0A2K8SJ00	88	0.456	93.779	0.204	0.125	0.227	0.648
E	K	A0A2K8SJ00	89	0.481	99.024	0.838	0.113	0.087	0.8
E	K	A0A2K8SJ00	91	0.629	129.365	-0.017	0.018	0.019	0.964
E	K	A0A2K8SJ00	94	0.681	140.061	-0.366	0.018	0.019	0.964
E	K	A0A2K8SJ12	5	0.286	58.912	-0.464	0.018	0.019	0.964
E	K	A0A2K8SJ12	6	0.594	122.124	-0.085	0.056	0.142	0.802
E	K	A0A2K8SJ12	11	0.391	80.388	1.117	0.024	0.655	0.322
B	K	A0A2K8SJ12	35	0.174	35.73	0.717	0.782	0.003	0.215
E	K	A0A2K8SJ12	43	0.536	110.214	0.042	0.004	0.085	0.91
B	K	A0A2K8SJ12	51	0.086	17.67	0.823	0.97	0.001	0.029
B	K	A0A2K8SJ12	75	0.204	41.901	1.301	0.268	0.043	0.689
E	K	A0A2K8SJ12	83	0.473	97.378	-0.952	0.181	0.017	0.803
E	K	A0A2K8SJ12	86	0.391	80.47	0.906	0.018	0.047	0.935
E	K	A0A2K8SJ12	94	0.283	58.131	1.616	0.97	0.001	0.029
E	K	A0A2K8SJ12	101	0.266	54.737	1.413	0.923	0.002	0.076
E	K	A0A2K8SJ12	104	0.646	132.903	1.488	0.502	0.002	0.495
E	K	A0A2K8SJ12	120	0.644	132.471	0.832	0.859	0.002	0.139
E	K	A0A2K8SJ12	121	0.344	70.864	0.555	0.694	0.003	0.303
E	K	A0A2K8SJ12	123	0.712	146.356	0.224	0.116	0.016	0.868
E	K	A0A2K8SJ12	127	0.361	74.237	0.18	0.004	0.336	0.66
E	K	A0A2K8SJ12	141	0.298	61.216	-0.828	0.022	0.552	0.426
E	K	A0A2K8SJ12	150	0.414	85.119	-1.146	0.386	0.097	0.517
E	K	A0A2K8SJ12	164	0.309	63.582	0.549	0.021	0.452	0.528
E	K	A0A2K8SJ12	175	0.287	59.015	1.227	0.02	0.205	0.775
E	K	A0A2K8SJ12	203	0.428	87.978	0.211	0.859	0.002	0.139
E	K	A0A2K8SJ12	208	0.529	108.898	1.791	0.97	0.001	0.029
E	K	A0A2K8SJ12	214	0.381	78.392	1.206	0.97	0.001	0.029
E	K	A0A2K8SJ12	215	0.749	153.966	1.225	0.859	0.002	0.139
E	K	A0A2K8SJ12	242	0.442	90.878	-0.105	0.004	0.085	0.91
E	K	A0A2K8SJ12	252	0.576	118.483	0.704	0.717	0.014	0.269
E	K	A0A2K8SJ12	253	0.457	93.923	0.93	0.782	0.003	0.215
E	K	A0A2K8SJ12	256	0.567	116.632	1.397	0.938	0.007	0.055
E	K	A0A2K8SJ12	269	0.428	88.019	-1.812	0.053	0.043	0.903
E	K	A0A2K8SJ12	283	0.42	86.373	0.807	0.001	0.9	0.099
E	K	A0A2K8SJ12	285	0.301	61.957	1.254	0.001	0.959	0.04
E	K	A0A2K8SJ12	295	0.519	106.738	0.654	0.004	0.514	0.481
E	K	A0A2K8SJ12	308	0.59	121.301	1.585	0.878	0.01	0.111
B	K	A0A2K8SJ75	25	0.087	17.896	0.005	0.011	0.918	0.071
E	K	A0A2K8SJ75	35	0.302	62.101	-0.028	0.02	0.205	0.775
E	K	A0A2K8SJ75	58	0.741	152.444	-0.858	0.018	0.019	0.964
E	K	A0A2K8SJ75	62	0.268	55.086	0.789	0.003	0.718	0.279
E	K	A0A2K8SJ75	83	0.462	94.992	0.637	0.074	0.484	0.442
E	K	A0A2K8SJ75	96	0.535	110.152	-0.766	0.018	0.141	0.84
E	K	A0A2K8SJ75	166	0.358	73.743	0.648	0.004	0.42	0.576
B	K	A0A2K8SJ75	168	0.155	31.925	0.962	0.001	0.9	0.099
E	K	A0A2K8SJ75	187	0.34	69.938	-0.755	0.004	0.197	0.799
E	K	A0A2K8SJ75	204	0.524	107.746	-0.168	0.053	0.043	0.903
E	K	A0A2K8SJ77	18	0.274	56.259	2.107	0.97	0.001	0.029
E	K	A0A2K8SJ77	104	0.522	107.437	-0.249	0.018	0.047	0.935
E	K	A0A2K8SJ77	147	0.788	162.174	1.153	0.003	0.003	0.994
E	K	A0A2K8SJ77	189	0.63	129.55	0.753	0.016	0.005	0.979
B	K	A0A2K8SJ77	196	0.146	29.991	1.075	0.004	0.514	0.481
E	K	A0A2K8SJ77	204	0.457	94.067	0.914	0.923	0.002	0.076
B	K	A0A2K8SJ77	206	0.079	16.333	0.636	0.97	0.001	0.029
E	K	A0A2K8SJ77	216	0.385	79.194	1.584	0.004	0.336	0.66
E	K	A0A2K8SJ77	229	0.489	100.628	0.346	0.181	0.017	0.803
E	K	A0A2K8SJ77	244	0.335	68.889	1.948	0.923	0.002	0.076
E	K	A0A2K8SJ95	12	0.553	113.732	0.589	0.859	0.002	0.139
E	K	A0A2K8SJ95	16	0.67	137.757	1.307	0.406	0.004	0.591
E	K	A0A2K8SJ95	19	0.625	128.46	0.45	0.694	0.003	0.303
E	K	A0A2K8SJ95	20	0.621	127.74	1.029	0.859	0.002	0.139
E	K	A0A2K8SJ95	23	0.61	125.559	1.137	0.97	0.001	0.029
E	K	A0A2K8SJ95	24	0.326	66.996	1.989	0.97	0.001	0.029
E	K	A0A2K8SJ95	31	0.327	67.161	2.134	0.97	0.001	0.029
E	K	A0A2K8SJ95	47	0.588	120.89	0.676	0.268	0.043	0.689
E	K	A0A2K8SJ95	54	0.337	69.28	0.649	0.005	0.045	0.951
E	K	A0A2K8SJ95	93	0.606	124.695	0.394	0.268	0.043	0.689
E	K	A0A2K8SJ95	95	0.354	72.88	1.289	0.056	0.142	0.802
E	K	A0A2K8SJ95	158	0.322	66.318	0.072	0.386	0.097	0.517
E	K	A0A2K8SJ95	234	0.447	91.907	1.682	0.97	0.001	0.029
E	K	A0A2K8SJ95	255	0.525	107.931	1.964	0.975	0.003	0.022
B	K	A0A2K8SJ95	275	0.122	25.013	0.593	0.782	0.003	0.215
E	K	A0A2K8SJ95	288	0.472	97.173	1.364	0.923	0.002	0.076
E	K	A0A2K8SJ95	294	0.381	78.454	-0.236	0.016	0.005	0.979
E	K	A0A2K8SJ95	311	0.273	56.074	1.75	0.97	0.001	0.029
E	K	A0A2K8SJ95	344	0.566	116.364	-0.266	0.43	0.016	0.555
E	K	A0A2K8SJ95	373	0.446	91.742	-0.838	0.406	0.004	0.591
E	K	A0A2K8SJ95	378	0.708	145.553	0.445	0.6	0.003	0.397
E	K	A0A2K8SJ95	409	0.599	123.297	0.029	0.859	0.002	0.139
E	K	A0A2K8SJ95	427	0.579	118.997	-0.907	0.694	0.003	0.303
E	K	A0A2K8SJ95	469	0.347	71.296	1.339	0.97	0.001	0.029
E	K	A0A2K8SJ95	499	0.503	103.57	-0.83	0.181	0.017	0.803
E	K	A0A2K8SJ95	510	0.663	136.482	0.647	0.018	0.019	0.964
E	K	A0A2K8SJ95	517	0.463	95.177	0.758	0.159	0.516	0.325
E	K	A0A2K8SJ95	560	0.444	91.393	1.106	0.004	0.42	0.576
E	K	A0A2K8SJ95	570	0.58	119.368	0.487	0.97	0.001	0.029
E	K	A0A2K8SJ95	574	0.475	97.666	2.067	0.97	0.001	0.029
E	K	A0A2K8SJ95	581	0.389	80.017	1.616	0.97	0.001	0.029
B	K	A0A2K8SJ95	599	0.165	33.879	-0.499	0.018	0.141	0.84
E	K	A0A2K8SJ95	617	0.418	85.941	-1.328	0.386	0.097	0.517
E	K	A0A2K8SJ95	636	0.352	72.509	-0.295	0.701	0.107	0.192
E	K	A0A2K8SJ95	639	0.296	60.867	-0.242	0.191	0.086	0.723
E	K	A0A2K8SJ95	662	0.618	127.164	-0.207	0.502	0.002	0.495
E	K	A0A2K8SJA3	3	0.556	114.328	-0.023	0.066	0.296	0.638
E	K	A0A2K8SJA3	9	0.497	102.295	0.055	0.148	0.418	0.435
E	K	A0A2K8SJA3	28	0.402	82.589	0.561	0.321	0.252	0.427
E	K	A0A2K8SJA3	48	0.517	106.388	0.151	0.022	0.359	0.619
E	K	A0A2K8SJA3	78	0.376	77.364	0.75	0.746	0.197	0.057
E	K	A0A2K8SJA3	83	0.562	115.542	0.708	0.184	0.043	0.773
E	K	A0A2K8SJA3	107	0.526	108.301	-1.352	0.018	0.088	0.893
E	K	A0A2K8SJA3	115	0.511	105.195	0.916	0.352	0.332	0.316
E	K	A0A2K8SJA3	147	0.311	64.014	0.852	0.391	0.466	0.143
E	K	A0A2K8SJA3	159	0.615	126.444	0.789	0.018	0.019	0.964
E	K	A0A2K8SJA3	166	0.392	80.573	0.118	0.021	0.452	0.528
E	K	A0A2K8SJA3	187	0.385	79.133	0.459	0.113	0.087	0.8
E	K	A0A2K8SJA3	189	0.402	82.691	-0.249	0.052	0.084	0.864
E	K	A0A2K8SJA3	206	0.569	117.126	0.516	0.802	0.014	0.185
E	K	A0A2K8SJA3	225	0.356	73.147	0.196	0.024	0.655	0.322
E	K	A0A2K8SJA3	236	0.467	96.041	-1.398	0.056	0.142	0.802
E	K	A0A2K8SJA3	240	0.31	63.829	-0.374	0.159	0.516	0.325
E	K	A0A2K8SJC1	23	0.524	107.869	1.782	0.018	0.019	0.964
E	K	A0A2K8SJC1	44	0.319	65.68	0.891	0.923	0.002	0.076
E	K	A0A2K8SJC1	58	0.564	116.056	-0.806	0.502	0.002	0.495
E	K	A0A2K8SJC1	80	0.59	121.404	1.859	0.97	0.001	0.029
B	K	A0A2K8SJC1	82	0.12	24.622	0.946	0.97	0.001	0.029
E	K	A0A2K8SJC1	84	0.439	90.241	2.497	0.988	0	0.012
E	K	A0A2K8SJC1	98	0.375	77.158	1.271	0.923	0.002	0.076
E	K	A0A2K8SJC1	99	0.431	88.574	1.197	0.859	0.002	0.139
E	K	A0A2K8SJC1	124	0.489	100.526	1.293	0.6	0.003	0.397
E	K	A0A2K8SJC1	132	0.417	85.756	1.143	0.113	0.087	0.8
E	K	A0A2K8SJC1	168	0.396	81.539	1.671	0.988	0	0.012
E	K	A0A2K8SJC1	170	0.394	81.025	0.912	0.97	0.001	0.029
E	K	A0A2K8SJC1	171	0.528	108.589	1.429	0.97	0.001	0.029
E	K	A0A2K8SJC1	179	0.614	126.279	0.379	0.859	0.002	0.139
E	K	A0A2K8SJC1	199	0.329	67.572	1.428	0.975	0.003	0.022
E	K	A0A2K8SJC1	215	0.325	66.852	-0.033	0.02	0.205	0.775
E	K	A0A2K8SJC1	216	0.444	91.29	-0.899	0.056	0.142	0.802
E	K	A0A2K8SJC1	238	0.579	119.08	0.508	0.923	0.002	0.076
E	K	A0A2K8SJC1	251	0.551	113.32	2.114	0.97	0.001	0.029
E	K	A0A2K8SJC1	283	0.732	150.552	1.563	0.923	0.002	0.076
E	K	A0A2K8SJC1	298	0.487	100.238	2.088	0.988	0	0.012
E	K	A0A2K8SJL1	29	0.603	124.058	-0.014	0.923	0.002	0.076
E	K	A0A2K8SJL1	51	0.501	103.015	-0.214	0.455	0.046	0.498
E	K	A0A2K8SJL1	66	0.55	113.217	0.553	0.053	0.043	0.903
E	K	A0A2K8SJL1	78	0.311	63.932	0.37	0.339	0.016	0.645
B	K	A0A2K8SJL1	83	0.235	48.319	0.468	0.802	0.014	0.185
E	K	A0A2K8SJL1	85	0.33	67.86	0.719	0.622	0.015	0.363
E	K	A0A2K8SJL1	101	0.349	71.851	0.884	0.386	0.097	0.517
E	K	A0A2K8SJL1	124	0.479	98.592	1.017	0.257	0.016	0.727
E	K	A0A2K8SJL1	161	0.501	102.973	-0.462	0.118	0.15	0.732
E	K	A0A2K8SJL1	184	0.465	95.671	-1.286	0.052	0.084	0.864
E	K	A0A2K8SJL1	219	0.423	86.929	-0.432	0.113	0.087	0.8
E	K	A0A2K8SJL1	278	0.594	122.248	0.206	0.802	0.014	0.185
E	K	A0A2K8SJL1	282	0.412	84.728	0.915	0.004	0.616	0.381
E	K	A0A2K8SJL1	287	0.395	81.313	0.58	0.004	0.514	0.481
E	K	A0A2K8SJN2	20	0.703	144.504	-0.232	0.018	0.047	0.935
E	K	A0A2K8SJN2	88	0.281	57.719	1.282	0.97	0.001	0.029
E	K	A0A2K8SJN2	132	0.439	90.22	-0.66	0.125	0.227	0.648
E	K	A0A2K8SJN2	147	0.367	75.574	-0.353	0.191	0.086	0.723
E	K	A0A2K8SJN2	165	0.368	75.656	1.72	0.97	0.001	0.029
E	K	A0A2K8SJN2	176	0.276	56.753	0.654	0.003	0.718	0.279
E	K	A0A2K8SJN2	278	0.568	116.879	-0.266	0.053	0.043	0.903
E	K	A0A2K8SJN2	307	0.592	121.836	-0.134	0.074	0.484	0.442
E	K	A0A2K8SJN2	308	0.632	130.105	-0.964	0.018	0.088	0.893
E	K	A0A2K8SJN2	334	0.608	125.127	1.093	0.859	0.002	0.139
E	K	A0A2K8SJN2	353	0.436	89.706	1.402	0.938	0.007	0.055
E	K	A0A2K8SJN2	362	0.52	106.902	0.535	0.053	0.043	0.903
E	K	A0A2K8SJN2	378	0.393	80.799	0.53	0.079	0.592	0.329
E	K	A0A2K8SJN2	392	0.384	78.989	1.344	0.018	0.846	0.136
E	K	A0A2K8SJN2	393	0.469	96.453	1.329	0.004	0.514	0.481
E	K	A0A2K8SJQ5	4	0.493	101.492	0.561	0.66	0.049	0.291
E	K	A0A2K8SJQ5	28	0.548	112.765	0.426	0.018	0.019	0.964
E	K	A0A2K8SJQ5	35	0.517	106.285	-0.742	0.053	0.043	0.903
E	K	A0A2K8SJQ5	37	0.602	123.79	0.192	0.118	0.15	0.732
E	K	A0A2K8SJQ5	45	0.687	141.234	0.19	0.018	0.019	0.964
E	K	A0A2K8SJQ5	47	0.458	94.272	0.733	0.021	0.279	0.699
E	K	A0A2K8SJQ5	72	0.651	133.849	0.672	0.024	0.655	0.322
E	K	A0A2K8SJQ5	89	0.636	130.928	-0.332	0.005	0.045	0.951
E	K	A0A2K8SJQ5	124	0.658	135.433	1.098	0.694	0.003	0.303
E	K	A0A2K8SJQ5	127	0.564	115.974	-1.141	0.181	0.017	0.803
E	K	A0A2K8SJQ5	134	0.464	95.507	0.286	0.074	0.484	0.442
B	K	A0A2K8SJQ5	145	0.17	34.866	0.926	0.002	0.816	0.182
E	K	A0A2K8SJQ5	155	0.243	50.006	-0.081	0.003	0.718	0.279
E	K	A0A2K8SJQ5	177	0.51	104.989	-0.179	0.018	0.047	0.935
E	K	A0A2K8SJQ5	178	0.566	116.488	-0.82	0.058	0.017	0.925
E	K	A0A2K8SJQ5	181	0.47	96.658	-0.957	0.053	0.043	0.903
E	K	A0A2K8SJQ5	185	0.675	138.847	0.954	0.859	0.002	0.139
E	K	A0A2K8SJQ5	199	0.478	98.366	0.742	0.005	0.045	0.951
E	K	A0A2K8SJQ5	200	0.508	104.598	-0.808	0.005	0.015	0.979
E	K	A0A2K8SJU5	7	0.469	96.556	0.141	0.231	0.33	0.439
B	K	A0A2K8SJU5	32	0.154	31.657	0.671	0.938	0.007	0.055
B	K	A0A2K8SJU5	41	0.243	49.965	0.737	0.923	0.002	0.076
E	K	A0A2K8SJU5	42	0.42	86.456	0.257	0.859	0.002	0.139
E	K	A0A2K8SJU5	86	0.531	109.144	-0.713	0.109	0.005	0.886
E	K	A0A2K8SJU5	98	0.309	63.623	-0.2	0.056	0.142	0.802
E	K	A0A2K8SJU5	116	0.375	77.076	-0.886	0.018	0.047	0.935
E	K	A0A2K8SJU5	128	0.687	141.398	0.47	0.859	0.002	0.139
E	K	A0A2K8SJU5	162	0.478	98.283	-0.27	0.181	0.017	0.803
E	K	A0A2K8SJU5	172	0.59	121.404	0.134	0.113	0.043	0.844
E	K	A0A2K8SJZ9	5	0.431	88.76	0.605	0.018	0.141	0.84
E	K	A0A2K8SJZ9	11	0.346	71.131	-0.023	0.056	0.142	0.802
E	K	A0A2K8SJZ9	39	0.248	51.096	0.793	0.018	0.846	0.136
E	K	A0A2K8SJZ9	96	0.559	114.986	-0.638	0.018	0.088	0.893
E	K	A0A2K8SJZ9	114	0.487	100.258	0.483	0.02	0.205	0.775
E	K	A0A2K8SJZ9	169	0.54	111.016	-0.775	0.052	0.084	0.864
E	K	A0A2K8SJZ9	196	0.435	89.459	-1.072	0.056	0.142	0.802
E	K	A0A2K8SJZ9	233	0.516	106.059	0.283	0.02	0.205	0.775
E	K	A0A2K8SJZ9	250	0.289	59.447	1.386	0.001	0.959	0.04
E	K	A0A2K8SJZ9	259	0.42	86.476	-0.12	0.018	0.047	0.935
B	K	A0A2K8SJZ9	277	0.249	51.158	0.189	0.923	0.002	0.076
E	K	A0A2K8SJZ9	298	0.426	87.628	-0.562	0.246	0.004	0.75
E	K	A0A2K8SJZ9	321	0.582	119.635	-2.342	0.018	0.019	0.964
B	K	A0A2K8SJZ9	323	0.179	36.903	-0.895	0.004	0.263	0.733
B	K	A0A2K8SJZ9	356	0.218	44.904	1.026	0.97	0.001	0.029
E	K	A0A2K8SJZ9	368	0.481	98.942	-0.666	0.502	0.002	0.495
E	K	A0A2K8SJZ9	380	0.262	53.955	-0.182	0.02	0.205	0.775
E	K	A0A2K8SJZ9	447	0.609	125.189	-1.058	0.181	0.017	0.803
E	K	A0A2K8SJZ9	457	0.322	66.153	-1.548	0.018	0.088	0.893
E	K	A0A2K8SJZ9	459	0.583	119.903	-2.199	0.058	0.017	0.925
E	K	A0A2K8SJZ9	468	0.35	71.954	-1.157	0.058	0.017	0.925
E	K	A0A2K8SJZ9	478	0.558	114.698	-1.835	0.018	0.019	0.964
B	K	A0A2K8SJZ9	499	0.049	10.038	0.764	0.97	0.001	0.029
B	K	A0A2K8SJZ9	509	0.207	42.642	0.115	0.321	0.003	0.675
E	K	A0A2K8SJZ9	510	0.589	121.198	-1.381	0.016	0.005	0.979
B	K	A0A2K8SJZ9	526	0.184	37.767	1.315	0.97	0.001	0.029
E	K	A0A2K8SJZ9	550	0.449	92.318	-0.352	0.018	0.047	0.935
E	K	A0A2K8SJZ9	745	0.443	91.187	0.417	0.004	0.42	0.576
E	K	A0A2K8SJZ9	746	0.635	130.681	-0.049	0.004	0.085	0.91
B	K	A0A2K8SK33	20	0.243	50.026	0.455	0.004	0.616	0.381
E	K	A0A2K8SK33	35	0.357	73.455	1.03	0.97	0.001	0.029
E	K	A0A2K8SK33	36	0.351	72.262	1.916	0.97	0.001	0.029
E	K	A0A2K8SK33	39	0.441	90.775	2.103	0.97	0.001	0.029
B	K	A0A2K8SK33	83	0.127	26.165	1.458	0.97	0.001	0.029
B	K	A0A2K8SK33	108	0.112	22.997	0.65	0.97	0.001	0.029
B	K	A0A2K8SK33	130	0.163	33.591	1.057	0.004	0.138	0.858
E	K	A0A2K8SK33	159	0.444	91.29	-0.429	0.018	0.019	0.964
B	K	A0A2K8SK33	171	0.271	55.704	-1.279	0.056	0.142	0.802
E	K	A0A2K8SK33	186	0.587	120.746	1.276	0.923	0.002	0.076
E	K	A0A2K8SK33	193	0.476	97.934	2.328	0.988	0	0.012
E	K	A0A2K8SK33	200	0.498	102.356	1.876	0.988	0	0.012
E	K	A0A2K8SK33	204	0.468	96.329	1.951	0.859	0.002	0.139
B	K	A0A2K8SK51	43	0.228	46.92	-0.402	0.018	0.088	0.893
B	K	A0A2K8SK51	45	0.163	33.447	0.254	0.018	0.846	0.136
E	K	A0A2K8SK51	101	0.392	80.614	-1.105	0.056	0.142	0.802
B	K	A0A2K8SK51	116	0.275	56.485	-1.226	0.064	0.216	0.721
E	K	A0A2K8SK51	123	0.318	65.371	-1.89	0.052	0.084	0.864
E	K	A0A2K8SK51	169	0.385	79.236	-1.901	0.018	0.088	0.893
E	K	A0A2K8SK51	200	0.27	55.436	0.415	0.024	0.655	0.322
E	K	A0A2K8SK51	344	0.368	75.677	-1.741	0.113	0.087	0.8
B	K	A0A2K8SK51	360	0.24	49.45	-1.261	0.066	0.296	0.638
B	K	A0A2K8SK51	372	0.239	49.203	-0.761	0.064	0.216	0.721
B	K	A0A2K8SK51	415	0.276	56.794	-1.832	0.056	0.142	0.802
E	K	A0A2K8SK51	454	0.389	80.1	-1.736	0.052	0.084	0.864
B	K	A0A2K8SK51	493	0.265	54.469	-1.605	0.113	0.087	0.8
B	K	A0A2K8SK51	538	0.277	56.999	-1.053	0.074	0.484	0.442
E	K	A0A2K8SK51	556	0.375	77.076	-1.681	0.113	0.087	0.8
B	K	A0A2K8SK51	570	0.237	48.669	-1.797	0.118	0.15	0.732
E	K	A0A2K8SK51	647	0.326	67.099	-1.19	0.064	0.216	0.721
E	K	A0A2K8SK51	701	0.394	81.046	-1.52	0.018	0.141	0.84
B	K	A0A2K8SK51	742	0.221	45.521	-1.843	0.02	0.205	0.775
B	K	A0A2K8SK51	886	0.175	35.977	-0.725	0.02	0.205	0.775
E	K	A0A2K8SK65	22	0.415	85.448	-0.072	0.307	0.165	0.527
E	K	A0A2K8SK65	28	0.301	61.998	0.653	0.021	0.756	0.223
E	K	A0A2K8SK65	37	0.578	118.956	0.259	0.018	0.047	0.935
E	K	A0A2K8SK65	53	0.559	115.069	0.539	0.216	0.235	0.548
E	K	A0A2K8SK65	63	0.301	61.977	0.224	0.802	0.014	0.185
E	K	A0A2K8SK65	76	0.457	93.943	0.743	0.278	0.093	0.628
E	K	A0A2K8SK65	78	0.467	95.98	1.11	0.069	0.386	0.545
E	K	A0A2K8SK65	83	0.299	61.607	0.899	0.003	0.718	0.279
E	K	A0A2K8SK65	106	0.483	99.333	0.266	0.018	0.088	0.893
E	K	A0A2K8SK65	113	0.428	88.101	-0.3	0.199	0.152	0.649
E	K	A0A2K8SK65	129	0.57	117.187	0.891	0.003	0.718	0.279
E	K	A0A2K8SK65	131	0.458	94.169	0.653	0.001	0.9	0.099
E	K	A0A2K8SK76	3	0.452	93.038	-0.342	0.064	0.216	0.721
E	K	A0A2K8SK76	31	0.755	155.283	1.487	0.859	0.002	0.139
E	K	A0A2K8SK76	49	0.425	87.402	0.086	0.024	0.655	0.322
E	K	A0A2K8SK76	55	0.535	110.049	-1.567	0.052	0.084	0.864
E	K	A0A2K8SK76	68	0.595	122.33	0.551	0.024	0.655	0.322
E	K	A0A2K8SK76	129	0.302	62.163	-0.64	0.246	0.004	0.75
B	K	A0A2K8SK76	131	0.139	28.572	0.9	0.923	0.002	0.076
B	K	A0A2K8SK76	166	0.224	46.015	0.486	0.005	0.045	0.951
B	K	A0A2K8SK76	170	0.052	10.758	1.156	0.001	0.959	0.04
B	K	A0A2K8SK76	179	0.085	17.485	-1.511	0.001	0.9	0.099
E	K	A0A2K8SK76	189	0.483	99.415	0.352	0.802	0.014	0.185
B	K	A0A2K8SK76	201	0.044	9.133	0.93	0.011	0.918	0.071
E	K	A0A2K8SK76	218	0.596	122.494	-1.518	0.005	0.015	0.979
E	K	A0A2K8SK76	237	0.513	105.504	-1.336	0.004	0.138	0.858
E	K	A0A2K8SK76	251	0.574	118.113	1.922	0.97	0.001	0.029
E	K	A0A2K8SK76	258	0.605	124.448	1.753	0.97	0.001	0.029
B	K	A0A2K8SK76	272	0.134	27.502	0.164	0.004	0.42	0.576
B	K	A0A2K8SK76	294	0.25	51.363	-0.843	0.782	0.003	0.215
E	K	A0A2K8SK76	305	0.419	86.229	2.171	0.975	0.003	0.022
E	K	A0A2K8SK78	4	0.558	114.781	0.173	0.406	0.004	0.591
E	K	A0A2K8SK78	12	0.47	96.617	0.514	0.923	0.002	0.076
E	K	A0A2K8SK78	55	0.607	124.819	-0.512	0.191	0.086	0.723
E	K	A0A2K8SK78	60	0.42	86.456	-1.147	0.184	0.043	0.773
E	K	A0A2K8SK78	65	0.508	104.413	-0.308	0.353	0.048	0.598
E	K	A0A2K8SK78	90	0.487	100.196	1.375	0.923	0.002	0.076
B	K	A0A2K8SK78	108	0.231	47.558	0.533	0.938	0.007	0.055
E	K	A0A2K8SK78	110	0.612	125.888	1.054	0.859	0.002	0.139
E	K	A0A2K8SK78	140	0.361	74.258	2.112	0.97	0.001	0.029
E	K	A0A2K8SK78	146	0.409	84.131	0.661	0.109	0.005	0.886
E	K	A0A2K8SK78	170	0.57	117.167	-0.398	0.018	0.047	0.935
E	K	A0A2K8SK78	181	0.794	163.408	0.346	0.005	0.015	0.979
E	K	A0A2K8SK99	5	0.673	138.518	0.118	0.018	0.019	0.964
B	K	A0A2K8SK99	8	0.226	46.57	1.722	0.002	0.816	0.182
B	K	A0A2K8SK99	21	0.124	25.507	0.806	0.97	0.001	0.029
E	K	A0A2K8SK99	31	0.701	144.196	1.483	0.782	0.003	0.215
B	K	A0A2K8SK99	99	0.169	34.66	0.868	0.97	0.001	0.029
E	K	A0A2K8SK99	188	0.454	93.429	-0.936	0.181	0.017	0.803
B	K	A0A2K8SK99	194	0.057	11.684	0.621	0.004	0.42	0.576
E	K	A0A2K8SK99	220	0.259	53.338	0.6	0.782	0.003	0.215
E	K	A0A2K8SK99	286	0.281	57.884	1.845	0.066	0.296	0.638
E	K	A0A2K8SK99	294	0.284	58.439	0.204	0.118	0.15	0.732
E	K	A0A2K8SK99	297	0.425	87.361	-0.033	0.052	0.084	0.864
E	K	A0A2K8SK99	318	0.672	138.169	1.351	0.782	0.003	0.215
E	K	A0A2K8SK99	320	0.304	62.595	-0.051	0.246	0.004	0.75
E	K	A0A2K8SK99	338	0.636	130.825	1.61	0.923	0.002	0.076
B	K	A0A2K8SK99	343	0.206	42.292	1.168	0.97	0.001	0.029
E	K	A0A2K8SK99	347	0.367	75.574	0.752	0.246	0.004	0.75
E	K	A0A2K8SK99	348	0.573	117.804	0.776	0.005	0.015	0.979
B	K	A0A2K8SK99	388	0.218	44.801	0.107	0.923	0.002	0.076
E	K	A0A2K8SKD7	38	0.279	57.287	-0.102	0.021	0.452	0.528
E	K	A0A2K8SKD7	145	0.341	70.103	0.692	0.018	0.846	0.136
E	K	A0A2K8SKD7	179	0.449	92.277	0.386	0.113	0.087	0.8
E	K	A0A2K8SKD7	213	0.323	66.503	0.374	0.011	0.918	0.071
E	K	A0A2K8SKF6	31	0.493	101.369	-0.661	0.125	0.227	0.648
E	K	A0A2K8SKF6	43	0.522	107.458	0.944	0.97	0.001	0.029
E	K	A0A2K8SKF6	53	0.634	130.496	0.295	0.052	0.084	0.864
E	K	A0A2K8SKF6	85	0.347	71.398	0.874	0.011	0.918	0.071
E	K	A0A2K8SKF6	94	0.42	86.476	-0.395	0.053	0.043	0.903
E	K	A0A2K8SKF6	109	0.427	87.875	0.428	0.923	0.002	0.076
E	K	A0A2K8SKF6	167	0.594	122.104	-0.196	0.064	0.216	0.721
E	K	A0A2K8SKI5	63	0.672	138.313	-0.747	0.016	0.005	0.979
E	K	A0A2K8SKI5	87	0.42	86.353	-0.1	0.005	0.015	0.979
E	K	A0A2K8SKI5	133	0.436	89.603	-0.651	0.522	0.016	0.462
E	K	A0A2K8SKI5	156	0.594	122.227	0.212	0.522	0.016	0.462
E	K	A0A2K8SKI5	187	0.391	80.47	-0.622	0.018	0.019	0.964
E	K	A0A2K8SKI5	242	0.548	112.724	2.032	0.988	0	0.012
E	K	A0A2K8SKI7	4	0.589	121.096	0.256	0.069	0.386	0.545
E	K	A0A2K8SKI7	7	0.397	81.745	-0.178	0.252	0.423	0.325
E	K	A0A2K8SKI7	52	0.453	93.244	-1.492	0.018	0.047	0.935
E	K	A0A2K8SKI7	54	0.512	105.236	-0.419	0.018	0.019	0.964
E	K	A0A2K8SKI7	70	0.275	56.568	0.786	0.001	0.959	0.04
B	K	A0A2K8SKI7	89	0.16	32.912	-1.942	0.004	0.336	0.66
E	K	A0A2K8SKI7	98	0.354	72.838	0.17	0.003	0.718	0.279
E	K	A0A2K8SKI7	114	0.643	132.286	-0.698	0.018	0.047	0.935
E	K	A0A2K8SKI7	117	0.471	96.864	0.404	0.004	0.616	0.381
B	K	A0A2K8SKI7	131	0.076	15.695	1.316	0.001	0.959	0.04
B	K	A0A2K8SKI7	146	0.103	21.187	0.485	0.011	0.918	0.071
E	K	A0A2K8SKI7	207	0.395	81.149	-0.619	0.018	0.141	0.84
E	K	A0A2K8SKI7	209	0.332	68.231	-0.115	0.024	0.655	0.322
E	K	A0A2K8SKI7	222	0.483	99.353	0.449	0.02	0.205	0.775
E	K	A0A2K8SKI7	227	0.503	103.467	0.253	0.021	0.756	0.223
E	K	A0A2K8SKI7	232	0.494	101.554	-1.865	0.052	0.084	0.864
E	K	A0A2K8SKI7	246	0.581	119.471	-0.551	0.005	0.015	0.979
B	K	A0A2K8SKI7	252	0.157	32.377	0.452	0.001	0.959	0.04
E	K	A0A2K8SKI7	287	0.518	106.47	-0.979	0.021	0.279	0.699
E	K	A0A2K8SKI7	306	0.347	71.378	-0.285	0.005	0.015	0.979
E	K	A0A2K8SKI7	318	0.735	151.251	-0.088	0.005	0.045	0.951
B	K	A0A2K8SKI7	325	0.149	30.649	0.911	0.001	0.959	0.04
B	K	A0A2K8SKI7	340	0.159	32.624	0.495	0.018	0.846	0.136
E	K	A0A2K8SKI7	351	0.423	87.011	-0.356	0.113	0.043	0.844
E	K	A0A2K8SKI7	352	0.47	96.679	-0.307	0.113	0.087	0.8
E	K	A0A2K8SKI7	359	0.547	112.497	1.036	0.02	0.205	0.775
B	K	A0A2K8SKI7	381	0.236	48.525	-0.069	0.001	0.9	0.099
E	K	A0A2K8SKI7	395	0.333	68.416	0.212	0.066	0.296	0.638
B	K	A0A2K8SKI7	406	0.104	21.434	0.186	0.024	0.655	0.322
E	K	A0A2K8SKI7	416	0.56	115.192	-1.671	0.005	0.015	0.979
B	K	A0A2K8SKI7	430	0.18	36.964	-0.184	0.021	0.756	0.223
E	K	A0A2K8SKI7	436	0.469	96.453	0.873	0.066	0.296	0.638
E	K	A0A2K8SKK7	182	0.468	96.247	0.236	0.052	0.084	0.864
E	K	A0A2K8SKK7	216	0.535	110.111	-0.876	0.053	0.043	0.903
E	K	A0A2K8SKK7	221	0.272	55.868	0.455	0.011	0.918	0.071
E	K	A0A2K8SKR6	20	0.656	135.021	0.465	0.339	0.016	0.645
E	K	A0A2K8SKR6	50	0.647	133.108	-0.069	0.058	0.017	0.925
E	K	A0A2K8SKR6	62	0.527	108.507	0.424	0.181	0.017	0.803
E	K	A0A2K8SKR6	69	0.573	117.948	0.417	0.116	0.016	0.868
E	K	A0A2K8SKR6	72	0.562	115.603	0.873	0.257	0.016	0.727
E	K	A0A2K8SKR6	82	0.504	103.693	0.37	0.113	0.043	0.844
E	K	A0A2K8SKR6	88	0.465	95.609	-0.238	0.058	0.017	0.925
E	K	A0A2K8SKR6	91	0.469	96.494	0.498	0.116	0.016	0.868
E	K	A0A2K8SKR6	92	0.405	83.37	0.2	0.058	0.017	0.925
E	K	A0A2K8SKR6	94	0.561	115.501	0.006	0.058	0.017	0.925
E	K	A0A2K8SKR6	101	0.436	89.767	0.648	0.116	0.016	0.868
E	K	A0A2K8SKR6	117	0.578	118.812	0.92	0.97	0.001	0.029
E	K	A0A2K8SKR6	125	0.605	124.366	0.533	0.018	0.047	0.935
E	K	A0A2K8SKR6	133	0.677	139.279	-0.073	0.022	0.359	0.619
E	K	A0A2K8SKR6	135	0.638	131.154	-0.478	0.02	0.205	0.775
E	K	A0A2K8SKR6	155	0.339	69.732	0.416	0.02	0.205	0.775
E	K	A0A2K8SKR6	174	0.521	107.149	-0.068	0.018	0.141	0.84
E	K	A0A2K8SKR6	175	0.338	69.547	-0.226	0.021	0.452	0.528
E	K	A0A2K8SKR6	183	0.453	93.264	-0.662	0.005	0.015	0.979
E	K	A0A2K8SKR6	184	0.633	130.167	-0.159	0.018	0.019	0.964
E	K	A0A2K8SKR6	197	0.385	79.092	0.344	0.278	0.093	0.628
E	K	A0A2K8SKR6	215	0.477	98.181	0.738	0.118	0.15	0.732
E	K	A0A2K8SKT7	23	0.37	76.047	0.68	0.307	0.165	0.527
E	K	A0A2K8SKT7	42	0.601	123.564	0.566	0.502	0.002	0.495
E	K	A0A2K8SKT7	45	0.505	103.796	0.359	0.339	0.016	0.645
E	K	A0A2K8SKT7	54	0.695	142.879	0.172	0.184	0.043	0.773
E	K	A0A2K8SKT7	56	0.543	111.798	0.058	0.053	0.043	0.903
E	K	A0A2K8SKT7	62	0.54	111.14	0.207	0.113	0.087	0.8
B	K	A0A2K8SKT7	71	0.167	34.331	-0.045	0.97	0.001	0.029
B	K	A0A2K8SKT7	180	0.129	26.494	-0.042	0.021	0.452	0.528
E	K	A0A2K8SKT7	190	0.54	111.14	0.821	0.018	0.088	0.893
E	K	A0A2K8SKT7	223	0.437	89.911	-0.531	0.694	0.003	0.303
E	K	A0A2K8SKT7	226	0.597	122.885	-0.065	0.058	0.017	0.925
E	K	A0A2K8SKT7	238	0.3	61.731	0.709	0.923	0.002	0.076
E	K	A0A2K8SKT7	297	0.681	140.061	1.141	0.923	0.002	0.076
E	K	A0A2K8SKT7	301	0.405	83.206	1.949	0.97	0.001	0.029
E	K	A0A2K8SKT7	307	0.619	127.411	1.199	0.923	0.002	0.076
E	K	A0A2K8SKT7	350	0.569	116.961	0.262	0.43	0.016	0.555
E	K	A0A2K8SKT7	446	0.639	131.504	-1.097	0.018	0.088	0.893
B	K	A0A2K8SKT7	464	0.208	42.806	1.355	0.001	0.959	0.04
B	K	A0A2K8SKT7	468	0.261	53.77	1.096	0.001	0.959	0.04
B	K	A0A2K8SKT7	602	0.227	46.735	0.294	0.859	0.002	0.139
E	K	A0A2K8SKT7	636	0.565	116.118	-0.028	0.321	0.003	0.675
E	K	A0A2K8SKT7	640	0.435	89.562	1.041	0.406	0.004	0.591
E	K	A0A2K8SKT7	671	0.438	90.097	0.853	0.018	0.019	0.964
E	K	A0A2K8SKT7	689	0.393	80.922	0.171	0.056	0.142	0.802
B	K	A0A2K8SKT7	703	0.263	54.12	0.425	0.97	0.001	0.029
E	K	A0A2K8SKT7	712	0.654	134.61	-0.78	0.058	0.017	0.925
E	K	A0A2K8SKT7	713	0.631	129.756	-0.069	0.016	0.005	0.979
B	K	A0A2K8SKT7	740	0.1	20.652	0.208	0.001	0.9	0.099
E	K	A0A2K8SKT7	780	0.514	105.709	-0.586	0.109	0.005	0.886
E	K	A0A2K8SKT7	785	0.5	102.829	-0.478	0.018	0.019	0.964
E	K	A0A2K8SKT7	804	0.402	82.609	2.312	0.97	0.001	0.029
E	K	A0A2K8SKT7	892	0.326	66.955	1.495	0.386	0.097	0.517
E	K	A0A2K8SKT7	904	0.598	123.091	-1.849	0.053	0.043	0.903
B	K	A0A2K8SKT7	909	0.132	27.05	0.946	0.022	0.359	0.619
B	K	A0A2K8SKT7	912	0.136	27.872	0.106	0.024	0.655	0.322
B	K	A0A2K8SKT7	936	0.306	62.944	1.115	0.018	0.846	0.136
E	K	A0A2K8SKT7	972	0.393	80.902	1.409	0.004	0.514	0.481
E	K	A0A2K8SKT7	982	0.705	144.957	0.451	0.016	0.005	0.979
E	K	A0A2K8SKT7	996	0.461	94.725	1.444	0.923	0.002	0.076
E	K	A0A2K8SKT7	998	0.365	75.019	2.025	0.6	0.003	0.397
E	K	A0A2K8SKT7	1021	0.416	85.633	0.067	0.43	0.016	0.555
E	K	A0A2K8SKT7	1050	0.325	66.791	2.13	0.988	0	0.012
E	K	A0A2K8SKT7	1088	0.408	83.864	0.895	0.923	0.002	0.076
E	K	A0A2K8SKT7	1097	0.365	75.101	2.05	0.938	0.007	0.055
B	K	A0A2K8SKT7	1116	0.337	69.28	-1.172	0.6	0.003	0.397
E	K	A0A2K8SKT7	1146	0.342	70.267	-1.086	0.018	0.019	0.964
E	K	A0A2K8SKT7	1218	0.504	103.714	1.134	0.97	0.001	0.029
E	K	A0A2K8SKT7	1250	0.564	116.015	-0.221	0.005	0.015	0.979
E	K	A0A2K8SKT7	1251	0.39	80.285	1.174	0.004	0.138	0.858
E	K	A0A2K8SKT7	1289	0.666	137.099	-0.161	0.053	0.043	0.903
E	K	A0A2K8SKT7	1293	0.432	88.842	-0.66	0.018	0.019	0.964
E	K	A0A2K8SKT7	1298	0.284	58.501	0.938	0.923	0.002	0.076
B	K	A0A2K8SKT7	1303	0.234	48.154	1.319	0.97	0.001	0.029
E	K	A0A2K8SKT7	1314	0.62	127.452	1.284	0.923	0.002	0.076
E	K	A0A2K8SKT7	1366	0.678	139.403	1.201	0.859	0.002	0.139
E	K	A0A2K8SKT7	1369	0.765	157.278	0.694	0.016	0.005	0.979
E	K	A0A2K8SKT7	1386	0.289	59.55	1.099	0.97	0.001	0.029
E	K	A0A2K8SKT7	1391	0.516	106.162	0.18	0.005	0.015	0.979
E	K	A0A2K8SKT7	1427	0.315	64.837	0.417	0.018	0.846	0.136
E	K	A0A2K8SKT7	1433	0.542	111.592	-0.121	0.053	0.004	0.942
E	K	A0A2K8SKT7	1441	0.468	96.309	2.35	0.97	0.001	0.029
E	K	A0A2K8SKT7	1444	0.342	70.267	1.842	0.97	0.001	0.029
E	K	A0A2K8SKT7	1453	0.536	110.193	0.023	0.053	0.004	0.942
E	K	A0A2K8SKT7	1582	0.385	79.174	-0.484	0.717	0.014	0.269
E	K	A0A2K8SKT7	1598	0.381	78.454	-0.931	0.386	0.097	0.517
E	K	A0A2K8SKT7	1600	0.402	82.609	-1.032	0.191	0.086	0.723
E	K	A0A2K8SKT7	1603	0.485	99.785	-1.319	0.199	0.152	0.649
E	K	A0A2K8SKT7	1662	0.336	69.053	0.804	0.878	0.01	0.111
E	K	A0A2K8SKT7	1689	0.511	105.174	1.048	0.004	0.514	0.481
E	K	A0A2K8SKT7	1700	0.589	121.054	-0.043	0.321	0.003	0.675
E	K	A0A2K8SKT7	1760	0.406	83.411	1.141	0.97	0.001	0.029
E	K	A0A2K8SKT7	1805	0.313	64.364	2.169	0.923	0.002	0.076
E	K	A0A2K8SKT7	1819	0.404	83	-0.395	0.018	0.019	0.964
E	K	A0A2K8SKT7	1921	0.47	96.679	2.402	0.97	0.001	0.029
B	K	A0A2K8SKT7	2004	0.196	40.399	1.447	0.006	0.962	0.032
B	K	A0A2K8SKT7	2140	0.234	48.093	0.377	0.859	0.002	0.139
E	K	A0A2K8SKT7	2167	0.357	73.414	2.001	0.004	0.42	0.576
E	K	A0A2K8SKT7	2176	0.384	79.051	-0.138	0.43	0.016	0.555
E	K	A0A2K8SKT7	2196	0.515	106.038	-0.371	0.113	0.043	0.844
E	K	A0A2K8SKT7	2230	0.39	80.244	0.214	0.056	0.142	0.802
E	K	A0A2K8SKT7	2247	0.289	59.365	0.425	0.859	0.002	0.139
B	K	A0A2K8SKT7	2299	0.096	19.685	0.617	0.97	0.001	0.029
B	K	A0A2K8SKT7	2308	0.112	22.956	0.223	0.002	0.816	0.182
E	K	A0A2K8SKT7	2378	0.631	129.879	-0.907	0.058	0.017	0.925
E	K	A0A2K8SKT7	2389	0.3	61.628	1.058	0.022	0.359	0.619
E	K	A0A2K8SKT7	2401	0.621	127.699	0.869	0.005	0.015	0.979
E	K	A0A2K8SKT7	2435	0.364	74.978	1.391	0.353	0.048	0.598
E	K	A0A2K8SKT7	2444	0.681	140.082	-1.101	0.018	0.019	0.964
B	K	A0A2K8SKT7	2450	0.151	31.061	0.333	0.024	0.655	0.322
B	K	A0A2K8SKT7	2474	0.317	65.248	1.061	0.018	0.846	0.136
E	K	A0A2K8SKT7	2510	0.403	82.897	1.446	0.004	0.514	0.481
E	K	A0A2K8SKT7	2520	0.762	156.661	0.443	0.016	0.005	0.979
E	K	A0A2K8SKT7	2534	0.458	94.231	1.462	0.923	0.002	0.076
E	K	A0A2K8SKT7	2536	0.369	75.883	1.905	0.502	0.002	0.495
E	K	A0A2K8SKT7	2559	0.394	81.087	-0.024	0.43	0.016	0.555
E	K	A0A2K8SKT7	2588	0.325	66.811	2.121	0.97	0.001	0.029
E	K	A0A2K8SKT7	2626	0.431	88.718	1.179	0.97	0.001	0.029
E	K	A0A2K8SKT7	2635	0.35	72.057	1.909	0.938	0.007	0.055
E	K	A0A2K8SKT7	2654	0.342	70.247	-0.412	0.622	0.015	0.363
E	K	A0A2K8SKT7	2684	0.348	71.522	-1.272	0.018	0.019	0.964
E	K	A0A2K8SKT7	2757	0.59	121.281	1.587	0.97	0.001	0.029
E	K	A0A2K8SKT7	2788	0.598	123.029	0.088	0.005	0.015	0.979
E	K	A0A2K8SKT7	2827	0.69	141.933	-0.345	0.053	0.043	0.903
E	K	A0A2K8SKT7	2831	0.474	97.564	-0.686	0.018	0.019	0.964
E	K	A0A2K8SKT7	2836	0.305	62.738	0.988	0.923	0.002	0.076
B	K	A0A2K8SKT7	2841	0.223	45.953	1.405	0.97	0.001	0.029
E	K	A0A2K8SKT7	2852	0.621	127.74	1.105	0.923	0.002	0.076
E	K	A0A2K8SKT7	2904	0.656	135.021	1.129	0.859	0.002	0.139
E	K	A0A2K8SKT7	2907	0.745	153.164	0.707	0.016	0.005	0.979
E	K	A0A2K8SKT7	2924	0.311	64.014	0.941	0.923	0.002	0.076
E	K	A0A2K8SKT7	2929	0.542	111.469	0.296	0.005	0.015	0.979
E	K	A0A2K8SKT7	2965	0.319	65.557	0.601	0.021	0.756	0.223
E	K	A0A2K8SKT7	2971	0.493	101.369	-0.229	0.053	0.004	0.942
E	K	A0A2K8SKT7	2979	0.474	97.481	2.179	0.97	0.001	0.029
E	K	A0A2K8SKT7	2982	0.344	70.843	1.696	0.97	0.001	0.029
E	K	A0A2K8SKT7	2991	0.589	121.157	-0.019	0.053	0.004	0.942
E	K	A0A2K8SKT7	3120	0.475	97.79	-0.753	0.622	0.015	0.363
E	K	A0A2K8SKT7	3136	0.374	77.014	-0.784	0.386	0.097	0.517
E	K	A0A2K8SKT7	3138	0.395	81.149	-0.878	0.278	0.093	0.628
E	K	A0A2K8SKT7	3141	0.408	84.028	-1.458	0.184	0.043	0.773
E	K	A0A2K8SKT7	3200	0.368	75.615	0.721	0.802	0.014	0.185
E	K	A0A2K8SKT7	3227	0.526	108.219	1.119	0.004	0.42	0.576
E	K	A0A2K8SKT7	3238	0.646	132.82	0.337	0.502	0.002	0.495
E	K	A0A2K8SKT7	3298	0.364	74.916	0.995	0.97	0.001	0.029
E	K	A0A2K8SKT7	3343	0.312	64.199	2.141	0.923	0.002	0.076
E	K	A0A2K8SKT7	3357	0.391	80.346	-0.164	0.058	0.017	0.925
E	K	A0A2K8SKT7	3459	0.449	92.256	2.413	0.97	0.001	0.029
B	K	A0A2K8SKT7	3542	0.163	33.447	1.666	0.006	0.962	0.032
B	K	A0A2K8SKT7	3678	0.233	47.887	0.45	0.859	0.002	0.139
E	K	A0A2K8SKT7	3716	0.385	79.236	0.59	0.406	0.004	0.591
E	K	A0A2K8SKT7	3733	0.516	106.141	-0.005	0.339	0.016	0.645
E	K	A0A2K8SKT7	3737	0.429	88.225	-0.105	0.116	0.016	0.868
E	K	A0A2K8SKT7	3763	0.555	114.225	1.171	0.018	0.019	0.964
E	K	A0A2K8SKT7	3765	0.385	79.256	0.248	0.056	0.142	0.802
E	K	A0A2K8SKT7	3788	0.473	97.399	0.788	0.005	0.015	0.979
B	K	A0A2K8SKT7	3817	0.099	20.303	0.27	0.001	0.9	0.099
E	K	A0A2K8SKT7	3840	0.609	125.333	0.998	0.003	0.003	0.994
E	K	A0A2K8SKT7	3918	0.584	120.17	-0.325	0.053	0.043	0.903
E	K	A0A2K8SKT7	3945	0.376	77.343	0.399	0.018	0.047	0.935
E	K	A0A2K8SKT7	3986	0.527	108.466	-1.517	0.116	0.016	0.868
B	K	A0A2K8SKT7	3993	0.123	25.239	0.776	0.021	0.279	0.699
B	K	A0A2K8SKT7	3996	0.126	25.959	0.314	0.024	0.655	0.322
B	K	A0A2K8SKT7	4020	0.283	58.131	0.913	0.018	0.846	0.136
E	K	A0A2K8SKT7	4039	0.657	135.083	-0.724	0.016	0.005	0.979
E	K	A0A2K8SKT7	4056	0.377	77.528	1.444	0.004	0.616	0.381
E	K	A0A2K8SKT7	4080	0.472	97.152	1.491	0.97	0.001	0.029
E	K	A0A2K8SKT7	4082	0.368	75.8	1.962	0.6	0.003	0.397
E	K	A0A2K8SKT7	4105	0.396	81.354	0.099	0.522	0.016	0.462
E	K	A0A2K8SKT7	4123	0.664	136.605	0.195	0.113	0.043	0.844
E	K	A0A2K8SKT7	4176	0.783	161.084	0.27	0.016	0.005	0.979
E	K	A0A2K8SKT7	4284	0.438	90.179	1.025	0.004	0.42	0.576
E	K	A0A2K8SKT7	4316	0.555	114.143	1.929	0.97	0.001	0.029
E	K	A0A2K8SKT7	4458	0.584	120.026	1.909	0.97	0.001	0.029
E	K	A0A2K8SKT7	4598	0.475	97.687	0.753	0.004	0.616	0.381
B	K	A0A2K8SKT7	4751	0.241	49.533	0.501	0.859	0.002	0.139
E	K	A0A2K8SKT7	4785	0.576	118.421	-0.009	0.246	0.004	0.75
E	K	A0A2K8SKT7	4789	0.433	89.068	0.856	0.321	0.003	0.675
E	K	A0A2K8SKT7	4792	0.739	151.909	-0.656	0.109	0.005	0.886
E	K	A0A2K8SKT7	4838	0.39	80.182	0.247	0.056	0.142	0.802
B	K	A0A2K8SKT7	4845	0.217	44.678	-0.034	0.802	0.014	0.185
E	K	A0A2K8SKT7	4859	0.759	156.209	1.024	0.018	0.019	0.964
B	K	A0A2K8SKT7	4865	0.099	20.323	0.469	0.079	0.592	0.329
E	K	A0A2K8SKT7	4895	0.233	47.928	1.462	0.005	0.045	0.951
E	K	A0A2K8SKT7	4948	0.324	66.626	-0.045	0.118	0.15	0.732
E	K	A0A2K8SKT7	4982	0.612	125.868	-0.774	0.058	0.017	0.925
E	K	A0A2K8SKT7	5005	0.688	141.419	1.006	0.003	0.003	0.994
E	K	A0A2K8SKT7	5039	0.325	66.77	1.415	0.561	0.047	0.393
E	K	A0A2K8SKT7	5051	0.624	128.295	-2.331	0.018	0.047	0.935
B	K	A0A2K8SKT7	5056	0.135	27.708	1.101	0.021	0.452	0.528
B	K	A0A2K8SKT7	5059	0.158	32.398	0.152	0.024	0.655	0.322
B	K	A0A2K8SKT7	5083	0.3	61.772	1.087	0.021	0.756	0.223
E	K	A0A2K8SKT7	5119	0.435	89.48	1.251	0.004	0.514	0.481
E	K	A0A2K8SKT7	5129	0.689	141.768	0.045	0.016	0.005	0.979
E	K	A0A2K8SKT7	5143	0.496	101.965	1.546	0.923	0.002	0.076
E	K	A0A2K8SKT7	5145	0.362	74.525	1.874	0.6	0.003	0.397
E	K	A0A2K8SKT7	5168	0.419	86.106	0.07	0.339	0.016	0.645
E	K	A0A2K8SKT7	5197	0.324	66.667	2.124	0.988	0	0.012
E	K	A0A2K8SKT7	5235	0.414	85.078	1.152	0.923	0.002	0.076
E	K	A0A2K8SKT7	5244	0.366	75.368	2.208	0.938	0.007	0.055
E	K	A0A2K8SKT7	5263	0.36	74.011	-0.814	0.522	0.016	0.462
E	K	A0A2K8SKT7	5293	0.359	73.785	-1.251	0.018	0.019	0.964
E	K	A0A2K8SKT7	5366	0.582	119.738	1.406	0.97	0.001	0.029
E	K	A0A2K8SKT7	5397	0.553	113.793	-0.026	0.005	0.015	0.979
E	K	A0A2K8SKT7	5436	0.654	134.528	-0.535	0.053	0.043	0.903
E	K	A0A2K8SKT7	5440	0.448	92.051	-0.624	0.018	0.019	0.964
E	K	A0A2K8SKT7	5445	0.299	61.607	0.977	0.923	0.002	0.076
B	K	A0A2K8SKT7	5450	0.234	48.072	1.382	0.97	0.001	0.029
E	K	A0A2K8SKT7	5461	0.609	125.333	1.211	0.923	0.002	0.076
E	K	A0A2K8SKT7	5513	0.678	139.403	1.139	0.859	0.002	0.139
E	K	A0A2K8SKT7	5516	0.751	154.481	0.674	0.016	0.005	0.979
E	K	A0A2K8SKT7	5533	0.299	61.587	1.206	0.923	0.002	0.076
E	K	A0A2K8SKT7	5538	0.539	110.934	0.276	0.005	0.015	0.979
E	K	A0A2K8SKT7	5574	0.321	65.968	0.772	0.002	0.816	0.182
E	K	A0A2K8SKT7	5580	0.555	114.246	-0.185	0.016	0.005	0.979
E	K	A0A2K8SKT7	5588	0.457	94.087	2.337	0.97	0.001	0.029
E	K	A0A2K8SKT7	5591	0.324	66.667	1.938	0.97	0.001	0.029
E	K	A0A2K8SKT7	5600	0.605	124.49	0.143	0.053	0.004	0.942
E	K	A0A2K8SKT7	5729	0.49	100.855	-0.122	0.622	0.015	0.363
E	K	A0A2K8SKT7	5745	0.388	79.729	-0.927	0.191	0.086	0.723
E	K	A0A2K8SKT7	5747	0.474	97.44	-1.068	0.118	0.15	0.732
E	K	A0A2K8SKT7	5750	0.405	83.35	-1.04	0.268	0.043	0.689
E	K	A0A2K8SKT7	5809	0.321	65.947	0.8	0.802	0.014	0.185
E	K	A0A2K8SKT7	5836	0.495	101.863	1.015	0.004	0.42	0.576
E	K	A0A2K8SKT7	5847	0.565	116.22	-0.027	0.406	0.004	0.591
E	K	A0A2K8SKT7	5907	0.365	75.081	0.969	0.97	0.001	0.029
E	K	A0A2K8SKT7	5952	0.299	61.587	2.054	0.923	0.002	0.076
E	K	A0A2K8SKT7	5966	0.403	82.959	-0.12	0.058	0.017	0.925
E	K	A0A2K8SKT7	6068	0.471	96.926	2.426	0.97	0.001	0.029
B	K	A0A2K8SKT7	6151	0.185	37.972	1.544	0.006	0.962	0.032
B	K	A0A2K8SKT7	6287	0.234	48.113	0.534	0.859	0.002	0.139
E	K	A0A2K8SKT7	6325	0.412	84.81	0.781	0.406	0.004	0.591
E	K	A0A2K8SKT7	6342	0.547	112.436	0.094	0.43	0.016	0.555
E	K	A0A2K8SKT7	6346	0.398	81.951	-0.25	0.116	0.016	0.868
E	K	A0A2K8SKT7	6372	0.551	113.258	1.211	0.018	0.019	0.964
E	K	A0A2K8SKT7	6374	0.392	80.614	0.22	0.056	0.142	0.802
E	K	A0A2K8SKT7	6397	0.486	99.991	0.722	0.005	0.015	0.979
B	K	A0A2K8SKT7	6426	0.098	20.056	0.225	0.001	0.9	0.099
E	K	A0A2K8SKT7	6449	0.613	126.135	1.095	0.003	0.003	0.994
E	K	A0A2K8SKT7	6527	0.577	118.668	-0.479	0.018	0.047	0.935
E	K	A0A2K8SKT7	6554	0.374	76.87	0.451	0.005	0.045	0.951
E	K	A0A2K8SKT7	6595	0.512	105.318	-1.355	0.116	0.016	0.868
B	K	A0A2K8SKT7	6602	0.131	26.926	0.768	0.022	0.359	0.619
B	K	A0A2K8SKT7	6605	0.134	27.584	0.276	0.024	0.655	0.322
B	K	A0A2K8SKT7	6629	0.269	55.395	0.839	0.018	0.846	0.136
E	K	A0A2K8SKT7	6648	0.655	134.775	-0.581	0.053	0.004	0.942
E	K	A0A2K8SKT7	6665	0.423	87.032	1.236	0.004	0.616	0.381
E	K	A0A2K8SKT7	6689	0.486	100.073	1.476	0.97	0.001	0.029
E	K	A0A2K8SKT7	6691	0.377	77.569	1.881	0.6	0.003	0.397
E	K	A0A2K8SKT7	6714	0.393	80.737	0.116	0.522	0.016	0.462
E	K	A0A2K8SKT7	6732	0.646	132.903	0.179	0.184	0.043	0.773
E	K	A0A2K8SKT7	6785	0.814	167.502	0.336	0.016	0.005	0.979
E	K	A0A2K8SKT7	6893	0.421	86.538	1.005	0.004	0.42	0.576
E	K	A0A2K8SKT7	6925	0.562	115.603	1.907	0.97	0.001	0.029
E	K	A0A2K8SKT7	7067	0.619	127.267	1.788	0.97	0.001	0.029
E	K	A0A2K8SKT7	7207	0.502	103.261	0.876	0.004	0.514	0.481
B	K	A0A2K8SKT7	7360	0.256	52.659	0.391	0.859	0.002	0.139
E	K	A0A2K8SKT7	7394	0.589	121.157	-0.311	0.246	0.004	0.75
E	K	A0A2K8SKT7	7398	0.419	86.229	0.817	0.321	0.003	0.675
E	K	A0A2K8SKT7	7401	0.735	151.148	-0.437	0.176	0.004	0.82
E	K	A0A2K8SKT7	7447	0.394	81.066	0.287	0.056	0.142	0.802
B	K	A0A2K8SKT7	7454	0.236	48.566	-0.141	0.878	0.01	0.111
E	K	A0A2K8SKT7	7468	0.748	153.946	1.017	0.018	0.047	0.935
B	K	A0A2K8SKT7	7474	0.096	19.727	0.593	0.079	0.592	0.329
E	K	A0A2K8SKT7	7504	0.233	47.99	1.484	0.004	0.085	0.91
E	K	A0A2K8SKT7	7557	0.367	75.533	0.24	0.118	0.15	0.732
E	K	A0A2K8SKT7	7591	0.554	114.02	-0.555	0.058	0.017	0.925
E	K	A0A2K8SKT7	7614	0.659	135.639	1.015	0.018	0.019	0.964
E	K	A0A2K8SKT7	7648	0.349	71.769	1.541	0.561	0.047	0.393
E	K	A0A2K8SKT7	7660	0.666	136.996	-2.082	0.018	0.047	0.935
B	K	A0A2K8SKT7	7665	0.112	23.08	0.839	0.021	0.452	0.528
B	K	A0A2K8SKT7	7668	0.169	34.825	0.386	0.024	0.655	0.322
E	K	A0A2K8SKT7	7692	0.319	65.598	1.033	0.021	0.756	0.223
E	K	A0A2K8SKT7	7728	0.409	84.193	1.447	0.004	0.514	0.481
E	K	A0A2K8SKT7	7768	0.474	97.42	1.364	0.923	0.002	0.076
E	K	A0A2K8SKT7	7770	0.365	75.06	1.821	0.6	0.003	0.397
E	K	A0A2K8SKT7	7793	0.399	82.095	0.078	0.43	0.016	0.555
E	K	A0A2K8SKT7	7828	0.629	129.324	1.588	0.923	0.002	0.076
E	K	A0A2K8SKT7	7831	0.771	158.554	1.512	0.053	0.004	0.942
E	K	A0A2K8SKT7	7838	0.558	114.698	-0.673	0.053	0.043	0.903
E	K	A0A2K8SKT7	7859	0.305	62.759	1.184	0.97	0.001	0.029
B	K	A0A2K8SKT7	7864	0.193	39.68	1.279	0.005	0.045	0.951
E	K	A0A2K8SKT7	7886	0.662	136.256	0.209	0.782	0.003	0.215
E	K	A0A2K8SKT7	7923	0.385	79.256	0.034	0.522	0.016	0.462
B	K	A0A2K8SKT7	7982	0.278	57.205	-0.807	0.278	0.093	0.628
E	K	A0A2K8SKT7	8014	0.525	108.013	0.122	0.257	0.016	0.727
E	K	A0A2K8SKT7	8022	0.516	106.079	0.736	0.923	0.002	0.076
E	K	A0A2K8SKT7	8029	0.528	108.63	0.793	0.859	0.002	0.139
E	K	A0A2K8SKT7	8032	0.556	114.287	-0.342	0.321	0.003	0.675
E	K	A0A2K8SKT7	8037	0.513	105.565	-0.883	0.116	0.016	0.868
B	K	A0A2K8SKT7	8056	0.074	15.201	0.169	0.746	0.197	0.057
B	K	A0A2K8SKT7	8063	0.159	32.686	0.715	0.751	0.05	0.199
E	K	A0A2K8SKT7	8078	0.26	53.482	1.245	0.97	0.001	0.029
E	K	A0A2K8SKT7	8079	0.434	89.377	1.634	0.97	0.001	0.029
E	K	A0A2K8SKT7	8085	0.44	90.426	0.123	0.782	0.003	0.215
E	K	A0A2K8SKT7	8164	0.371	76.232	1.898	0.97	0.001	0.029
E	K	A0A2K8SLB0	8	0.503	103.488	1.584	0.988	0	0.012
E	K	A0A2K8SLB0	33	0.651	133.931	0.913	0.694	0.003	0.303
E	K	A0A2K8SLB0	37	0.497	102.336	0.851	0.694	0.003	0.303
B	K	A0A2K8SLB0	134	0.231	47.455	1.417	0.97	0.001	0.029
B	K	A0A2K8SLB0	136	0.191	39.268	0.995	0.97	0.001	0.029
E	K	A0A2K8SLC8	5	0.578	118.936	0.588	0.135	0.317	0.548
B	K	A0A2K8SLC8	10	0.211	43.382	1.367	0.079	0.592	0.329
E	K	A0A2K8SLC8	43	0.558	114.842	0.963	0.018	0.047	0.935
E	K	A0A2K8SLC8	85	0.435	89.521	1.158	0.717	0.014	0.269
E	K	A0A2K8SLC8	100	0.381	78.289	-0.467	0.053	0.043	0.903
E	K	A0A2K8SLC8	109	0.549	112.847	0.141	0.004	0.42	0.576
E	K	A0A2K8SLC8	112	0.533	109.7	1.219	0.003	0.718	0.279
E	K	A0A2K8SLC8	125	0.512	105.298	-1.108	0.018	0.047	0.935
E	K	A0A2K8SLC8	143	0.465	95.65	1.656	0.717	0.014	0.269
E	K	A0A2K8SLC8	148	0.379	78.022	0.88	0.056	0.142	0.802
B	K	A0A2K8SLC8	153	0.188	38.569	-0.347	0.923	0.002	0.076
E	K	A0A2K8SLC8	157	0.499	102.685	1.218	0.97	0.001	0.029
E	K	A0A2K8SLC8	174	0.48	98.798	0.488	0.782	0.003	0.215
E	K	A0A2K8SLC8	175	0.473	97.378	0.81	0.502	0.002	0.495
E	K	A0A2K8SLC8	198	0.666	137.058	0.231	0.923	0.002	0.076
E	K	A0A2K8SLC8	201	0.309	63.479	1.626	0.923	0.002	0.076
B	K	A0A2K8SLC8	203	0.222	45.645	1.402	0.859	0.002	0.139
E	K	A0A2K8SLC8	210	0.432	88.883	1.68	0.001	0.959	0.04
E	K	A0A2K8SLC8	223	0.518	106.614	-0.29	0.022	0.359	0.619
E	K	A0A2K8SLC8	229	0.484	99.662	0.951	0.064	0.216	0.721
E	K	A0A2K8SLC8	234	0.488	100.299	1.301	0.018	0.088	0.893
E	K	A0A2K8SLI3	3	0.579	119.1	-0.038	0.116	0.016	0.868
E	K	A0A2K8SLI3	8	0.346	71.234	-0.163	0.802	0.014	0.185
E	K	A0A2K8SLI3	13	0.414	85.119	0.739	0.831	0.044	0.125
B	K	A0A2K8SLN7	21	0.215	44.267	0.664	0.97	0.001	0.029
B	K	A0A2K8SLN7	22	0.26	53.461	1.149	0.97	0.001	0.029
B	K	A0A2K8SLN7	50	0.098	20.056	0.212	0.717	0.014	0.269
B	K	A0A2K8SLN7	51	0.182	37.499	0.174	0.923	0.002	0.076
E	K	A0A2K8SLN7	85	0.641	131.936	1.882	0.97	0.001	0.029
E	K	A0A2K8SLN7	104	0.737	151.539	0.955	0.6	0.003	0.397
E	K	A0A2K8SLN7	128	0.493	101.41	1.829	0.001	0.959	0.04
B	K	A0A2K8SLN7	133	0.195	40.05	1.561	0.003	0.718	0.279
E	K	A0A2K8SLN7	144	0.439	90.199	0.36	0.018	0.141	0.84
E	K	A0A2K8SLN7	146	0.754	155.118	-0.404	0.005	0.015	0.979
E	K	A0A2K8SLN7	167	0.519	106.82	1.399	0.018	0.047	0.935
E	K	A0A2K8SLN7	219	0.769	158.183	1.469	0.802	0.014	0.185
E	K	A0A2K8SLN7	223	0.439	90.282	1.913	0.001	0.959	0.04
E	K	A0A2K8SLN7	234	0.475	97.646	1.467	0.001	0.959	0.04
E	K	A0A2K8SLN7	268	0.764	157.258	0.35	0.053	0.043	0.903
E	K	A0A2K8SLN7	286	0.39	80.182	1.708	0.001	0.9	0.099
B	K	A0A2K8SLN7	315	0.147	30.279	-0.06	0.97	0.001	0.029
E	K	A0A2K8SLN7	329	0.606	124.634	0.169	0.016	0.005	0.979
E	K	A0A2K8SLN7	332	0.431	88.636	0.6	0.018	0.088	0.893
E	K	A0A2K8SLN7	357	0.392	80.552	1.626	0.97	0.001	0.029
E	K	A0A2K8SLN7	361	0.545	112.086	1.429	0.694	0.003	0.303
B	K	A0A2K8SLN7	390	0.055	11.231	1.252	0.001	0.983	0.017
E	K	A0A2K8SLN7	423	0.272	55.868	0.691	0.321	0.003	0.675
B	K	A0A2K8SLN7	427	0.138	28.469	0.855	0.938	0.007	0.055
E	K	A0A2K8SLQ3	3	0.499	102.747	0.189	0.561	0.047	0.393
E	K	A0A2K8SLQ3	27	0.427	87.937	0.971	0.878	0.01	0.111
E	K	A0A2K8SLQ3	33	0.487	100.238	-0.487	0.058	0.017	0.925
E	K	A0A2K8SLQ3	41	0.324	66.606	1.059	0.021	0.279	0.699
E	K	A0A2K8SLQ3	42	0.659	135.577	-0.888	0.018	0.019	0.964
E	K	A0A2K8SLQ3	57	0.464	95.486	1.448	0.831	0.044	0.125
E	K	A0A2K8SLQ3	79	0.323	66.359	0.788	0.97	0.001	0.029
B	K	A0A2K8SLQ3	81	0.263	54.017	0.091	0.859	0.002	0.139
E	K	A0A2K8SLQ3	104	0.431	88.677	1.267	0.97	0.001	0.029
B	K	A0A2K8SLQ3	116	0.106	21.907	0.805	0.97	0.001	0.029
E	K	A0A2K8SLQ3	121	0.335	68.93	2.062	0.988	0	0.012
E	K	A0A2K8SLQ3	135	0.411	84.502	0.793	0.053	0.043	0.903
E	K	A0A2K8SLQ3	166	0.422	86.723	0.014	0.502	0.102	0.396
E	K	A0A2K8SLQ3	169	0.364	74.854	-0.184	0.053	0.043	0.903
E	K	A0A2K8SLQ3	179	0.743	152.856	-1.801	0.005	0.045	0.951
E	K	A0A2K8SLQ3	223	0.412	84.728	0.332	0.022	0.359	0.619
E	K	A0A2K8SLQ3	224	0.567	116.652	0.202	0.022	0.359	0.619
E	K	A0A2K8SLQ3	237	0.297	61.072	1.499	0.97	0.001	0.029
E	K	A0A2K8SLQ3	264	0.386	79.4	-0.213	0.257	0.016	0.727
E	K	A0A2K8SLQ3	275	0.368	75.656	0.095	0.252	0.423	0.325
E	K	A0A2K8SLQ3	284	0.422	86.805	0.312	0.622	0.015	0.363
E	K	A0A2K8SLQ3	320	0.413	84.913	0.939	0.001	0.9	0.099
E	K	A0A2K8SLQ3	325	0.622	127.884	-0.841	0.004	0.138	0.858
E	K	A0A2K8SLQ3	337	0.529	108.815	0.409	0.859	0.002	0.139
E	K	A0A2K8SLQ3	342	0.573	117.948	0.427	0.923	0.002	0.076
B	K	A0A2K8SLQ3	362	0.213	43.794	1.059	0.072	0.855	0.073
E	K	A0A2K8SLQ3	369	0.475	97.707	-0.742	0.022	0.359	0.619
B	K	A0A2K8SLQ3	378	0.146	30.094	0.441	0.001	0.959	0.04
E	K	A0A2K8SLQ3	388	0.526	108.136	0.926	0.97	0.001	0.029
E	K	A0A2K8SLQ3	391	0.329	67.655	0.891	0.97	0.001	0.029
B	K	A0A2K8SLQ3	402	0.206	42.292	0.944	0.97	0.001	0.029
E	K	A0A2K8SLQ3	422	0.355	73.003	0.752	0.97	0.001	0.029
B	K	A0A2K8SLQ3	428	0.13	26.741	-1.63	0.782	0.003	0.215
E	K	A0A2K8SLQ3	429	0.675	138.889	0.384	0.694	0.003	0.303
E	K	A0A2K8SLQ3	498	0.291	59.9	0.747	0.97	0.001	0.029
E	K	A0A2K8SLQ3	524	0.328	67.367	1.094	0.113	0.043	0.844
E	K	A0A2K8SLQ3	527	0.692	142.406	0.919	0.053	0.043	0.903
E	K	A0A2K8SLQ3	528	0.621	127.657	0	0.058	0.017	0.925
E	K	A0A2K8SLS5	3	0.493	101.492	0.08	0.502	0.102	0.396
E	K	A0A2K8SLS5	33	0.469	96.391	-0.496	0.018	0.019	0.964
E	K	A0A2K8SLS5	41	0.3	61.751	0.925	0.022	0.359	0.619
E	K	A0A2K8SLS5	42	0.66	135.721	-0.758	0.005	0.015	0.979
E	K	A0A2K8SLS5	57	0.413	84.892	1.295	0.938	0.007	0.055
E	K	A0A2K8SLS5	79	0.395	81.169	0.67	0.802	0.014	0.185
E	K	A0A2K8SLS5	100	0.362	74.402	1.547	0.97	0.001	0.029
B	K	A0A2K8SLS5	116	0.131	26.844	0.472	0.975	0.003	0.022
E	K	A0A2K8SLS5	121	0.316	64.939	1.879	0.988	0	0.012
B	K	A0A2K8SLS5	129	0.178	36.573	0.769	0.97	0.001	0.029
E	K	A0A2K8SLS5	141	0.657	135.165	0.578	0.97	0.001	0.029
E	K	A0A2K8SLS5	167	0.599	123.235	-0.086	0.522	0.016	0.462
E	K	A0A2K8SLS5	170	0.422	86.908	-1.035	0.116	0.016	0.868
E	K	A0A2K8SLS5	180	0.51	104.866	-1.183	0.004	0.197	0.799
B	K	A0A2K8SLS5	196	0.268	55.189	-0.309	0.021	0.279	0.699
E	K	A0A2K8SLS5	224	0.409	84.152	0.147	0.069	0.386	0.545
E	K	A0A2K8SLS5	225	0.558	114.739	0.257	0.066	0.296	0.638
E	K	A0A2K8SLS5	255	0.591	121.63	-0.357	0.694	0.003	0.303
E	K	A0A2K8SLS5	276	0.395	81.334	0.169	0.079	0.592	0.329
E	K	A0A2K8SLS5	285	0.394	81.005	0.942	0.802	0.014	0.185
E	K	A0A2K8SLS5	307	0.493	101.513	0.673	0.113	0.087	0.8
E	K	A0A2K8SLS5	312	0.454	93.306	-0.264	0.181	0.017	0.803
E	K	A0A2K8SLS5	318	0.454	93.388	0.855	0.064	0.216	0.721
E	K	A0A2K8SLS5	326	0.544	111.963	-0.64	0.021	0.279	0.699
E	K	A0A2K8SLS5	341	0.482	99.23	0.494	0.938	0.007	0.055
E	K	A0A2K8SLS5	360	0.483	99.456	0.279	0.252	0.423	0.325
B	K	A0A2K8SLS5	362	0.245	50.355	0.725	0.252	0.423	0.325
E	K	A0A2K8SLS5	369	0.525	108.013	-0.722	0.018	0.088	0.893
B	K	A0A2K8SLS5	378	0.094	19.418	0.163	0.001	0.959	0.04
E	K	A0A2K8SLS5	388	0.441	90.734	1.018	0.97	0.001	0.029
B	K	A0A2K8SLS5	390	0.074	15.263	0.405	0.97	0.001	0.029
E	K	A0A2K8SLS5	391	0.258	53.153	0.997	0.97	0.001	0.029
B	K	A0A2K8SLS5	402	0.213	43.794	0.592	0.97	0.001	0.029
E	K	A0A2K8SLS5	429	0.648	133.376	0.365	0.694	0.003	0.303
E	K	A0A2K8SLS5	433	0.533	109.618	-0.75	0.181	0.017	0.803
E	K	A0A2K8SLS5	452	0.262	53.832	0.749	0.988	0	0.012
E	K	A0A2K8SLS5	470	0.409	84.09	0.666	0.923	0.002	0.076
E	K	A0A2K8SLS5	472	0.484	99.518	-0.117	0.406	0.004	0.591
E	K	A0A2K8SLS5	498	0.294	60.579	0.83	0.97	0.001	0.029
E	K	A0A2K8SLS5	524	0.275	56.465	1.216	0.268	0.043	0.689
E	K	A0A2K8SLS5	528	0.658	135.33	-0.226	0.018	0.019	0.964
E	K	A0A2K8SLV2	26	0.672	138.251	0.903	0.018	0.047	0.935
E	K	A0A2K8SLV2	31	0.481	98.901	0.54	0.022	0.359	0.619
E	K	A0A2K8SLV2	39	0.656	134.877	1.237	0.005	0.015	0.979
B	K	A0A2K8SLV2	53	0.116	23.841	-0.102	0.782	0.003	0.215
E	K	A0A2K8SLV2	75	0.357	73.414	1.621	0.001	0.959	0.04
E	K	A0A2K8SLV2	81	0.517	106.429	0.985	0.004	0.616	0.381
B	K	A0A2K8SLV2	109	0.218	44.925	0.19	0.43	0.016	0.555
E	K	A0A2K8SLV2	120	0.474	97.564	1.004	0.717	0.014	0.269
E	K	A0A2K8SLV2	125	0.565	116.241	0.403	0.43	0.016	0.555
E	K	A0A2K8SLV2	146	0.559	115.089	0.766	0.522	0.016	0.462
B	K	A0A2K8SLV2	148	0.261	53.585	0.713	0.622	0.015	0.363
E	K	A0A2K8SLV2	202	0.299	61.504	0.912	0.782	0.003	0.215
B	K	A0A2K8SLV2	223	0.18	37.067	1.379	0.159	0.516	0.325
E	K	A0A2K8SM45	4	0.6	123.502	0.01	0.02	0.205	0.775
E	K	A0A2K8SM45	13	0.469	96.37	1.094	0.024	0.655	0.322
E	K	A0A2K8SM45	17	0.475	97.81	0.114	0.021	0.452	0.528
E	K	A0A2K8SM45	47	0.454	93.306	2.02	0.988	0	0.012
E	K	A0A2K8SM45	55	0.364	74.916	0.391	0.694	0.003	0.303
E	K	A0A2K8SM45	58	0.423	87.073	-1.54	0.116	0.016	0.868
E	K	A0A2K8SM45	67	0.42	86.394	0.235	0.011	0.918	0.071
B	K	A0A2K8SM45	100	0.058	12.013	0.656	0.011	0.918	0.071
E	K	A0A2K8SM45	142	0.648	133.314	-0.064	0.053	0.043	0.903
E	K	A0A2K8SM45	146	0.381	78.289	1.166	0.004	0.085	0.91
E	K	A0A2K8SM45	177	0.582	119.615	-0.278	0.373	0.401	0.226
E	K	A0A2K8SM45	192	0.526	108.239	-0.693	0.066	0.296	0.638
E	K	A0A2K8SM45	193	0.385	79.174	-0.857	0.021	0.452	0.528
B	K	A0A2K8SM45	204	0.13	26.823	0.261	0.021	0.756	0.223
E	K	A0A2K8SM45	208	0.244	50.17	0.374	0.66	0.049	0.291
E	K	A0A2K8SM45	220	0.502	103.22	1.421	0.97	0.001	0.029
E	K	A0A2K8SM45	227	0.589	121.219	-0.675	0.116	0.016	0.868
E	K	A0A2K8SM45	229	0.313	64.425	-0.263	0.018	0.019	0.964
E	K	A0A2K8SM45	237	0.308	63.356	0.198	0.018	0.141	0.84
E	K	A0A2K8SM45	242	0.472	97.173	0.73	0.018	0.846	0.136
B	K	A0A2K8SM45	276	0.225	46.221	-0.799	0.522	0.016	0.462
E	K	A0A2K8SM45	278	0.442	90.94	-1.136	0.257	0.016	0.727
E	K	A0A2K8SM45	302	0.475	97.728	-0.61	0.113	0.043	0.844
E	K	A0A2K8SM45	303	0.396	81.395	-0.225	0.113	0.043	0.844
B	K	A0A2K8SM45	308	0.213	43.896	0.023	0.087	0.683	0.23
E	K	A0A2K8SM45	325	0.647	133.15	-0.723	0.191	0.086	0.723
B	K	A0A2K8SM45	327	0.235	48.298	-0.504	0.053	0.043	0.903
E	K	A0A2K8SM45	329	0.465	95.65	-0.183	0.02	0.205	0.775
E	K	A0A2K8SM45	399	0.536	110.255	0.128	0.43	0.016	0.555
B	K	A0A2K8SM45	432	0.166	34.146	0.897	0.97	0.001	0.029
E	K	A0A2K8SM45	433	0.461	94.787	2.255	0.988	0	0.012
B	K	A0A2K8SM45	460	0.197	40.502	0.415	0.018	0.141	0.84
E	K	A0A2K8SM92	12	0.361	74.299	1.716	0.135	0.317	0.548
E	K	A0A2K8SM92	21	0.316	65.083	2.093	0.011	0.918	0.071
E	K	A0A2K8SM92	28	0.385	79.236	0.862	0.022	0.359	0.619
E	K	A0A2K8SM92	40	0.562	115.603	0.285	0.052	0.084	0.864
E	K	A0A2K8SM92	42	0.471	96.967	0.634	0.018	0.088	0.893
E	K	A0A2K8SM92	55	0.43	88.492	0.182	0.021	0.452	0.528
E	K	A0A2K8SM92	68	0.474	97.42	1.388	0.022	0.359	0.619
E	K	A0A2K8SM92	72	0.373	76.664	1.819	0.001	0.9	0.099
E	K	A0A2K8SM92	77	0.677	139.362	0.338	0.005	0.045	0.951
E	K	A0A2K8SM92	84	0.579	119.059	1.611	0.001	0.9	0.099
E	K	A0A2K8SM92	96	0.596	122.535	0.546	0.053	0.043	0.903
B	K	A0A2K8SMI2	8	0.313	64.466	0.035	0.97	0.001	0.029
E	K	A0A2K8SMI2	116	0.546	112.374	0.873	0.113	0.087	0.8
E	K	A0A2K8SMI2	187	0.364	74.916	0.152	0.004	0.616	0.381
E	K	A0A2K8SMI2	233	0.452	92.935	-0.824	0.199	0.152	0.649
B	K	A0A2K8SMI2	313	0.143	29.456	1.234	0.001	0.959	0.04
E	K	A0A2K8SMI2	386	0.45	92.586	-0.043	0.022	0.359	0.619
E	K	A0A2K8SMI2	387	0.512	105.277	0.43	0.018	0.141	0.84
E	K	A0A2K8SMI2	432	0.344	70.72	0.687	0.001	0.959	0.04
E	K	A0A2K8SMI2	436	0.402	82.671	0.242	0.024	0.655	0.322
E	K	A0A2K8SMJ1	12	0.561	115.48	0.503	0.606	0.105	0.289
E	K	A0A2K8SMJ1	46	0.352	72.365	0.733	0.169	0.612	0.219
E	K	A0A2K8SMJ1	63	0.487	100.094	-0.237	0.199	0.152	0.649
E	K	A0A2K8SMJ1	110	0.419	86.229	0.203	0.938	0.007	0.055
E	K	A0A2K8SMJ1	122	0.445	91.598	0.531	0.453	0.248	0.299
E	K	A0A2K8SMN1	62	0.688	141.542	0.316	0.018	0.088	0.893
E	K	A0A2K8SMN1	88	0.404	83.021	1.056	0.003	0.718	0.279
E	K	A0A2K8SMN1	89	0.375	77.117	-0.329	0.004	0.42	0.576
E	K	A0A2K8SMN1	114	0.563	115.891	1.033	0.004	0.616	0.381
B	K	A0A2K8SMN1	118	0.169	34.681	0.471	0.001	0.9	0.099
E	K	A0A2K8SMN1	137	0.517	106.409	-0.382	0.064	0.216	0.721
E	K	A0A2K8SMN1	146	0.581	119.512	0.499	0.022	0.359	0.619
E	K	A0A2K8SMQ3	6	0.35	72.057	0.951	0.923	0.002	0.076
E	K	A0A2K8SMQ3	17	0.53	109	0.751	0.859	0.002	0.139
E	K	A0A2K8SMQ3	32	0.57	117.29	0.539	0.97	0.001	0.029
E	K	A0A2K8SMQ3	43	0.492	101.266	1.206	0.938	0.007	0.055
E	K	A0A2K8SMQ3	54	0.523	107.663	0.787	0.97	0.001	0.029
E	K	A0A2K8SMQ3	67	0.314	64.508	0.271	0.859	0.002	0.139
E	K	A0A2K8SMQ3	72	0.436	89.685	0.363	0.938	0.007	0.055
E	K	A0A2K8SMQ3	89	0.529	108.856	0.798	0.97	0.001	0.029
E	K	A0A2K8SMQ3	96	0.571	117.455	1.193	0.97	0.001	0.029
E	K	A0A2K8SMQ3	102	0.506	104.043	0.759	0.97	0.001	0.029
E	K	A0A2K8SMQ3	131	0.653	134.281	0.963	0.97	0.001	0.029
B	K	A0A2K8SMQ3	133	0.186	38.198	0.36	0.923	0.002	0.076
E	K	A0A2K8SMQ3	138	0.527	108.424	0.719	0.97	0.001	0.029
E	K	A0A2K8SMQ3	149	0.383	78.721	0.555	0.97	0.001	0.029
E	K	A0A2K8SMQ3	158	0.495	101.76	0.129	0.694	0.003	0.303
E	K	A0A2K8SMQ3	159	0.657	135.207	0.195	0.694	0.003	0.303
E	K	A0A2K8SMQ3	194	0.393	80.799	0.516	0.97	0.001	0.029
E	K	A0A2K8SMQ3	199	0.461	94.828	1.364	0.988	0	0.012
E	K	A0A2K8SMQ3	214	0.336	69.053	0.399	0.97	0.001	0.029
E	K	A0A2K8SMQ3	221	0.396	81.478	1.094	0.97	0.001	0.029
B	K	A0A2K8SMQ3	232	0.239	49.265	0.221	0.97	0.001	0.029
E	K	A0A2K8SMQ3	237	0.488	100.402	1.481	0.988	0	0.012
E	K	A0A2K8SMQ3	252	0.598	122.906	0.75	0.622	0.015	0.363
E	K	A0A2K8SMQ3	254	0.508	104.454	-0.344	0.622	0.015	0.363
E	K	A0A2K8SMQ3	259	0.571	117.537	1.089	0.859	0.002	0.139
E	K	A0A2K8SMQ3	266	0.888	182.579	1.533	0.016	0.005	0.979
E	K	A0A2K8SMW9	131	0.435	89.541	-0.415	0.004	0.138	0.858
E	K	A0A2K8SMW9	143	0.539	110.893	-0.629	0.018	0.088	0.893
B	K	A0A2K8SMW9	200	0.187	38.425	-0.531	0.001	0.9	0.099
E	K	A0A2K8SMW9	231	0.271	55.642	-0.382	0.004	0.514	0.481
E	K	A0A2K8SMW9	286	0.419	86.291	-1.73	0.018	0.088	0.893
E	K	A0A2K8SMW9	291	0.42	86.497	-1.216	0.056	0.142	0.802
E	K	A0A2K8SMW9	298	0.35	72.036	-0.911	0.074	0.484	0.442
E	K	A0A2K8SMW9	336	0.342	70.37	-1.263	0.216	0.235	0.548
E	K	A0A2K8SMW9	350	0.331	68.128	-1.681	0.216	0.235	0.548
E	K	A0A2K8SMW9	351	0.327	67.202	-1.013	0.321	0.252	0.427
E	K	A0A2K8SMW9	374	0.302	62.121	-1.062	0.125	0.227	0.648
B	K	A0A2K8SMW9	383	0.262	53.832	-0.145	0.717	0.014	0.269
E	K	A0A2K8SMW9	404	0.301	62.019	0.216	0.056	0.142	0.802
E	K	A0A2K8SMW9	420	0.337	69.218	0.622	0.923	0.002	0.076
E	K	A0A2K8SMW9	427	0.559	115.027	-0.44	0.113	0.043	0.844
E	K	A0A2K8SMW9	432	0.465	95.548	-0.252	0.02	0.205	0.775
E	K	A0A2K8SMW9	434	0.501	102.994	-0.08	0.02	0.205	0.775
E	K	A0A2K8SMW9	464	0.352	72.489	1.378	0.005	0.015	0.979
E	K	A0A2K8SMW9	525	0.5	102.809	-0.257	0.018	0.088	0.893
E	K	A0A2K8SN83	3	0.558	114.863	1.397	0.018	0.141	0.84
E	K	A0A2K8SN83	14	0.366	75.368	0.537	0.022	0.359	0.619
E	K	A0A2K8SN83	58	0.658	135.453	0.1	0.184	0.043	0.773
E	K	A0A2K8SN83	97	0.503	103.488	-1.519	0.184	0.043	0.773
E	K	A0A2K8SN83	109	0.495	101.863	0.706	0.859	0.002	0.139
E	K	A0A2K8SN83	112	0.61	125.374	0.69	0.859	0.002	0.139
E	K	A0A2K8SN83	115	0.812	166.987	0.253	0.016	0.005	0.979
E	K	A0A2K8SN83	141	0.566	116.467	-0.998	0.406	0.004	0.591
E	K	A0A2K8SN83	143	0.519	106.738	-0.938	0.181	0.017	0.803
E	K	A0A2K8SN83	219	0.551	113.444	1.718	0.97	0.001	0.029
E	K	A0A2K8SN83	222	0.576	118.38	1.202	0.97	0.001	0.029
E	K	A0A2K8SN83	225	0.48	98.777	0.36	0.406	0.004	0.591
E	K	A0A2K8SN83	227	0.443	91.146	-0.11	0.016	0.005	0.979
B	K	A0A2K8SN83	237	0.151	31.122	1.312	0.97	0.001	0.029
E	K	A0A2K8SN83	245	0.519	106.717	1.247	0.717	0.014	0.269
E	K	A0A2K8SN83	298	0.4	82.259	1.691	0.97	0.001	0.029
E	K	A0A2K8SN83	307	0.488	100.443	-0.063	0.109	0.005	0.886
B	K	A0A2K8SN83	331	0.125	25.795	-0.332	0.004	0.616	0.381
E	K	A0A2K8SN83	392	0.53	109.021	1.629	0.97	0.001	0.029
E	K	A0A2K8SN84	12	0.51	104.948	1.594	0.97	0.001	0.029
E	K	A0A2K8SN84	17	0.29	59.735	1.914	0.97	0.001	0.029
E	K	A0A2K8SN84	19	0.469	96.535	1.1	0.859	0.002	0.139
E	K	A0A2K8SN84	31	0.515	105.915	0.928	0.66	0.049	0.291
E	K	A0A2K8SN84	40	0.595	122.474	-1.155	0.018	0.047	0.935
E	K	A0A2K8SN84	69	0.721	148.33	-0.651	0.018	0.019	0.964
E	K	A0A2K8SN84	96	0.517	106.367	0.726	0.606	0.105	0.289
E	K	A0A2K8SN84	101	0.527	108.507	0.571	0.018	0.047	0.935
E	K	A0A2K8SN84	113	0.545	112.209	-0.007	0.004	0.616	0.381
E	K	A0A2K8SN84	125	0.556	114.39	-0.803	0.191	0.086	0.723
E	K	A0A2K8SN84	126	0.586	120.602	-0.658	0.113	0.087	0.8
B	K	A0A2K8SNB3	8	0.239	49.203	1.511	0.97	0.001	0.029
E	K	A0A2K8SNB3	34	0.546	112.25	0.223	0.113	0.087	0.8
E	K	A0A2K8SNB3	98	0.322	66.194	-0.091	0.005	0.045	0.951
E	K	A0A2K8SNB3	170	0.295	60.764	0.408	0.622	0.015	0.363
B	K	A0A2K8SNB8	49	0.157	32.315	0.452	0.975	0.003	0.022
E	K	A0A2K8SNB8	97	0.415	85.283	1.253	0.923	0.002	0.076
E	K	A0A2K8SNB8	153	0.527	108.507	1.617	0.988	0	0.012
E	K	A0A2K8SNB8	157	0.476	97.851	1.206	0.97	0.001	0.029
E	K	A0A2K8SNB8	171	0.656	135.001	0.141	0.176	0.004	0.82
E	K	A0A2K8SNI2	6	0.498	102.459	-0.075	0.058	0.017	0.925
E	K	A0A2K8SNI2	62	0.565	116.22	0.894	0.406	0.004	0.591
E	K	A0A2K8SNI2	63	0.287	59.036	-0.046	0.321	0.003	0.675
E	K	A0A2K8SNI2	92	0.425	87.443	-0.869	0.502	0.002	0.495
E	K	A0A2K8SNI2	95	0.448	92.236	-0.278	0.053	0.004	0.942
E	K	A0A2K8SNI2	104	0.583	119.985	0.823	0.694	0.003	0.303
E	K	A0A2K8SNN8	14	0.374	76.973	-0.386	0.184	0.043	0.773
E	K	A0A2K8SNN8	19	0.507	104.31	-1.307	0.018	0.019	0.964
E	K	A0A2K8SNN8	27	0.759	156.106	1.287	0.923	0.002	0.076
B	K	A0A2K8SNN8	32	0.162	33.365	1.341	0.97	0.001	0.029
E	K	A0A2K8SNN8	35	0.381	78.289	2.08	0.97	0.001	0.029
B	K	A0A2K8SNN8	39	0.231	47.476	1.915	0.97	0.001	0.029
E	K	A0A2K8SNN8	42	0.747	153.658	1.332	0.782	0.003	0.215
B	K	A0A2K8SNN8	69	0.167	34.27	-0.227	0.406	0.004	0.591
E	K	A0A2K8SNN8	85	0.467	96.062	0.398	0.058	0.017	0.925
E	K	A0A2K8SNN8	91	0.509	104.722	1.656	0.97	0.001	0.029
E	K	A0A2K8SNN8	127	0.678	139.485	-0.893	0.018	0.019	0.964
E	K	A0A2K8SNN8	133	0.325	66.811	0.695	0.005	0.045	0.951
B	K	A0A2K8SNN8	134	0.188	38.713	-0.427	0.004	0.138	0.858
E	K	A0A2K8SNN8	141	0.286	58.851	0.917	0.001	0.9	0.099
E	K	A0A2K8SNN8	161	0.489	100.505	1.061	0.018	0.088	0.893
E	K	A0A2K8SNU4	14	0.654	134.466	1.125	0.058	0.017	0.925
B	K	A0A2K8SNU4	18	0.209	42.971	2.226	0.001	0.983	0.017
B	K	A0A2K8SNU4	21	0.192	39.453	0.784	0.001	0.983	0.017
E	K	A0A2K8SNU4	46	0.317	65.289	1.199	0.004	0.616	0.381
E	K	A0A2K8SNU4	50	0.454	93.408	1.138	0.087	0.683	0.23
E	K	A0A2K8SNU4	60	0.353	72.715	1.292	0.923	0.002	0.076
E	K	A0A2K8SNU4	69	0.711	146.253	1.95	0.782	0.003	0.215
E	K	A0A2K8SNU7	26	0.298	61.257	0.59	0.022	0.552	0.426
B	K	A0A2K8SNU7	43	0.122	25.198	-1.379	0.231	0.33	0.439
B	K	A0A2K8SNU7	53	0.167	34.372	0.851	0.001	0.9	0.099
E	K	A0A2K8SNU7	59	0.415	85.345	-0.347	0.005	0.045	0.951
E	K	A0A2K8SNU7	84	0.481	98.921	0.852	0.058	0.017	0.925
E	K	A0A2K8SNU7	97	0.451	92.853	0.664	0.024	0.655	0.322
E	K	A0A2K8SNU7	109	0.363	74.649	-0.175	0.004	0.514	0.481
B	K	A0A2K8SNU7	121	0.174	35.812	-1.152	0.002	0.816	0.182
B	K	A0A2K8SNU7	129	0.213	43.773	-0.634	0.018	0.846	0.136
E	K	A0A2K8SNU7	160	0.423	86.991	-1.949	0.018	0.088	0.893
B	K	A0A2K8SNU7	164	0.173	35.668	-2.158	0.022	0.359	0.619
B	K	A0A2K8SNU7	170	0.288	59.242	-0.886	0.004	0.263	0.733
E	K	A0A2K8SNU7	202	0.251	51.528	0.178	0.001	0.9	0.099
B	K	A0A2K8SNU7	255	0.24	49.306	-1.785	0.021	0.279	0.699
B	K	A0A2K8SNU7	262	0.128	26.247	-0.512	0.022	0.552	0.426
B	K	A0A2K8SNU7	267	0.247	50.828	-1.784	0.02	0.205	0.775
B	K	A0A2K8SNU7	277	0.164	33.653	-0.648	0.024	0.655	0.322
B	K	A0A2K8SNU7	292	0.298	61.319	-1.722	0.02	0.205	0.775
B	K	A0A2K8SNU7	294	0.24	49.368	-2.009	0.02	0.205	0.775
B	K	A0A2K8SNU7	297	0.168	34.475	-2.494	0.022	0.359	0.619
B	K	A0A2K8SNU7	314	0.202	41.593	-1.343	0.004	0.514	0.481
E	K	A0A2K8SNU7	370	0.297	61.093	-1.841	0.02	0.205	0.775
E	K	A0A2K8SNU7	395	0.536	110.317	-0.616	0.018	0.141	0.84
E	K	A0A2K8SNU7	419	0.299	61.422	0.435	0.018	0.088	0.893
E	K	A0A2K8SNU7	430	0.392	80.614	-1.703	0.018	0.047	0.935
E	K	A0A2K8SNU7	445	0.392	80.593	-1.018	0.018	0.047	0.935
E	K	A0A2K8SNV4	22	0.461	94.766	-0.952	0.058	0.017	0.925
E	K	A0A2K8SNV4	25	0.528	108.568	-1.049	0.058	0.017	0.925
E	K	A0A2K8SNV4	40	0.646	132.882	0.18	0.018	0.088	0.893
E	K	A0A2K8SNV4	49	0.396	81.375	0.111	0.053	0.043	0.903
E	K	A0A2K8SNV4	74	0.312	64.137	0.823	0.004	0.616	0.381
E	K	A0A2K8SNV4	100	0.306	62.965	-1.167	0.216	0.235	0.548
B	K	A0A2K8SNV4	140	0.286	58.748	-1.131	0.199	0.152	0.649
E	K	A0A2K8SNV4	148	0.481	99.003	-1.546	0.184	0.043	0.773
E	K	A0A2K8SNV4	162	0.315	64.795	1.272	0.001	0.9	0.099
E	K	A0A2K8SNV4	200	0.414	85.16	-1.088	0.056	0.142	0.802
B	K	A0A2K8SNV4	241	0.121	24.828	0.269	0.004	0.616	0.381
E	K	A0A2K8SNV4	256	0.379	77.899	-1.986	0.018	0.088	0.893
E	K	A0A2K8SNV4	261	0.502	103.22	-1.654	0.018	0.047	0.935
E	K	A0A2K8SNV4	272	0.522	107.293	-0.891	0.053	0.043	0.903
B	K	A0A2K8SNV4	297	0.187	38.466	0.826	0.004	0.616	0.381
E	K	A0A2K8SNV4	316	0.473	97.296	-0.34	0.004	0.263	0.733
E	K	A0A2K8SNV4	334	0.672	138.148	-1.815	0.058	0.017	0.925
E	K	A0A2K8SNV4	348	0.357	73.455	-0.498	0.116	0.016	0.868
E	K	A0A2K8SNV4	362	0.467	96.041	-1.569	0.116	0.016	0.868
E	K	A0A2K8SNV4	383	0.586	120.602	-1.595	0.018	0.047	0.935
E	K	A0A2K8SNV4	415	0.519	106.738	-1.592	0.052	0.084	0.864
E	K	A0A2K8SNV4	418	0.496	102.068	-0.402	0.022	0.359	0.619
E	K	A0A2K8SNV4	420	0.437	89.932	-0.291	0.021	0.452	0.528
E	K	A0A2K8SNV4	429	0.345	71.069	-0.905	0.199	0.152	0.649
E	K	A0A2K8SNV4	459	0.312	64.137	0.08	0.004	0.197	0.799
B	K	A0A2K8SNV4	463	0.196	40.255	1.598	0.003	0.718	0.279
B	K	A0A2K8SNV4	466	0.123	25.322	1.201	0.001	0.959	0.04
E	K	A0A2K8SNV4	474	0.619	127.39	-0.35	0.018	0.047	0.935
E	K	A0A2K8SP02	36	0.342	70.308	2.085	0.988	0	0.012
E	K	A0A2K8SP02	96	0.574	117.969	0.813	0.694	0.003	0.303
E	K	A0A2K8SP02	113	0.591	121.63	-1.22	0.116	0.016	0.868
E	K	A0A2K8SP02	202	0.504	103.714	0.236	0.052	0.084	0.864
E	K	A0A2K8SP02	206	0.456	93.799	-0.521	0.116	0.016	0.868
E	K	A0A2K8SP02	265	0.386	79.338	2.146	0.97	0.001	0.029
E	K	A0A2K8SP02	268	0.603	123.955	1.449	0.782	0.003	0.215
B	K	A0A2K8SP02	273	0.119	24.54	0.167	0.011	0.918	0.071
E	K	A0A2K8SP02	294	0.778	160.137	1.924	0.6	0.003	0.397
E	K	A0A2K8SP02	295	0.401	82.568	0.872	0.109	0.005	0.886
E	K	A0A2K8SP02	306	0.423	86.991	1.401	0.97	0.001	0.029
E	K	A0A2K8SP02	314	0.584	120.129	1.927	0.988	0	0.012
E	K	A0A2K8SP02	331	0.453	93.182	0.702	0.184	0.043	0.773
E	K	A0A2K8SP02	333	0.423	86.929	0.662	0.268	0.043	0.689
E	K	A0A2K8SP02	343	0.307	63.232	0.948	0.923	0.002	0.076
E	K	A0A2K8SP02	346	0.602	123.79	0.067	0.43	0.016	0.555
E	K	A0A2K8SP02	354	0.482	99.127	0.606	0.353	0.048	0.598
E	K	A0A2K8SP02	358	0.658	135.33	0.421	0.113	0.087	0.8
E	K	A0A2K8SP12	5	0.535	110.152	0.335	0.066	0.296	0.638
E	K	A0A2K8SP12	6	0.556	114.451	0.255	0.056	0.142	0.802
B	K	A0A2K8SP12	55	0.202	41.613	0.675	0.923	0.002	0.076
E	K	A0A2K8SP12	74	0.251	51.672	0.814	0.988	0	0.012
E	K	A0A2K8SP12	81	0.571	117.516	-0.778	0.053	0.004	0.942
E	K	A0A2K8SP12	90	0.463	95.136	-0.949	0.278	0.093	0.628
E	K	A0A2K8SP12	145	0.58	119.327	0.992	0.782	0.003	0.215
E	K	A0A2K8SP12	150	0.72	148.145	0.64	0.6	0.003	0.397
E	K	A0A2K8SP12	172	0.459	94.499	1.74	0.988	0	0.012
E	K	A0A2K8SP12	179	0.672	138.169	0.771	0.406	0.004	0.591
E	K	A0A2K8SP12	189	0.436	89.623	-1.374	0.058	0.017	0.925
E	K	A0A2K8SP12	220	0.514	105.771	0.909	0.021	0.756	0.223
E	K	A0A2K8SPA4	8	0.691	142.098	0.855	0.053	0.043	0.903
E	K	A0A2K8SPC1	6	0.573	117.928	0.563	0.802	0.014	0.185
E	K	A0A2K8SPC1	12	0.601	123.626	-0.631	0.268	0.043	0.689
E	K	A0A2K8SPC1	14	0.435	89.459	-0.147	0.307	0.165	0.527
E	K	A0A2K8SPC1	87	0.37	76.109	1.632	0.831	0.044	0.125
E	K	A0A2K8SPC1	90	0.69	141.83	0.677	0.717	0.014	0.269
E	K	A0A2K8SPC1	124	0.565	116.118	-0.203	0.353	0.048	0.598
B	K	A0A2K8SQ07	19	0.131	26.967	1.528	0.97	0.001	0.029
E	K	A0A2K8SQ07	21	0.32	65.762	1.873	0.97	0.001	0.029
B	K	A0A2K8SQ07	49	0.209	42.93	1.478	0.97	0.001	0.029
B	K	A0A2K8SQ07	51	0.141	29.086	1.067	0.859	0.002	0.139
E	K	A0A2K8SQ07	57	0.557	114.493	1.144	0.923	0.002	0.076
B	K	A0A2K8SQ07	127	0.147	30.341	1.537	0.97	0.001	0.029
B	K	A0A2K8SQ07	153	0.174	35.73	0.288	0.97	0.001	0.029
B	K	A0A2K8SQ07	179	0.121	24.931	-1.083	0.113	0.043	0.844
E	K	A0A2K8SQ07	201	0.362	74.443	1.595	0.923	0.002	0.076
E	K	A0A2K8SQ07	205	0.619	127.349	-0.085	0.005	0.015	0.979
B	K	A0A2K8SQ07	245	0.204	42.045	-0.403	0.339	0.016	0.645
E	K	A0A2K8SQ07	257	0.698	143.537	-1.121	0.018	0.019	0.964
B	K	A0A2K8SQ07	260	0.285	58.542	-1.544	0.018	0.141	0.84
E	K	A0A2K8SQ07	268	0.38	78.125	-0.291	0.02	0.205	0.775
E	K	A0A2K8SQ07	332	0.566	116.323	1.143	0.522	0.016	0.462
E	K	A0A2K8SQ07	356	0.276	56.711	0.595	0.97	0.001	0.029
E	K	A0A2K8SQ07	364	0.578	118.874	1.157	0.246	0.004	0.75
E	K	A0A2K8SQ07	385	0.614	126.341	0.841	0.321	0.003	0.675
E	K	A0A2K8SQ07	396	0.494	101.616	0.227	0.502	0.002	0.495
E	K	A0A2K8SQ07	403	0.455	93.635	1.149	0.058	0.017	0.925
E	K	A0A2K8SQ31	6	0.457	94.005	0.198	0.066	0.296	0.638
E	K	A0A2K8SQ31	12	0.333	68.519	0.7	0.273	0.587	0.14
E	K	A0A2K8SQ31	30	0.459	94.457	-0.165	0.257	0.016	0.727
B	K	A0A2K8SQ31	39	0.164	33.632	-0.498	0.252	0.423	0.325
E	K	A0A2K8SQ31	51	0.487	100.155	-0.77	0.116	0.016	0.868
E	K	A0A2K8SQ31	81	0.437	89.911	-0.492	0.022	0.552	0.426
E	K	A0A2K8SQ31	123	0.475	97.666	0.624	0.064	0.216	0.721
E	K	A0A2K8SQ31	168	0.393	80.778	-0.961	0.018	0.088	0.893
E	K	A0A2K8SQ31	228	0.397	81.56	-0.337	0.069	0.386	0.545
E	K	A0A2K8SQ31	248	0.344	70.843	-0.723	0.191	0.086	0.723
E	K	A0A2K8SQ31	271	0.392	80.573	-0.242	0.252	0.423	0.325
E	K	A0A2K8SQ31	277	0.66	135.803	-1.627	0.018	0.019	0.964
E	K	A0A2K8SQ31	288	0.779	160.343	0.44	0.003	0.003	0.994
E	K	A0A2K8SQ37	5	0.635	130.64	0.247	0.018	0.047	0.935
E	K	A0A2K8SQ37	11	0.349	71.707	0.676	0.001	0.9	0.099
E	K	A0A2K8SQ37	17	0.326	67.099	1.095	0.011	0.918	0.071
B	K	A0A2K8SQ37	25	0.253	52.063	0.817	0.97	0.001	0.029
E	K	A0A2K8SQ37	59	0.581	119.573	-0.173	0.622	0.015	0.363
E	K	A0A2K8SQ37	83	0.409	84.111	1.169	0.97	0.001	0.029
B	K	A0A2K8SQ37	84	0.244	50.273	1.04	0.97	0.001	0.029
B	K	A0A2K8SQ37	91	0.212	43.588	0.961	0.97	0.001	0.029
E	K	A0A2K8SQ37	130	0.298	61.34	1.479	0.606	0.105	0.289
E	K	A0A2K8SQ60	3	0.5	102.85	-0.025	0.135	0.317	0.548
E	K	A0A2K8SQ60	17	0.494	101.657	0.088	0.021	0.279	0.699
E	K	A0A2K8SQ60	19	0.573	117.948	0	0.056	0.142	0.802
E	K	A0A2K8SQ60	22	0.575	118.277	-0.252	0.116	0.016	0.868
B	K	A0A2K8SQ70	25	0.189	38.898	1.026	0.004	0.138	0.858
B	K	A0A2K8SQ70	28	0.02	4.073	1.522	0.001	0.9	0.099
E	K	A0A2K8SQ70	47	0.306	62.944	-1.95	0.004	0.138	0.858
B	K	A0A2K8SQ70	65	0.046	9.544	0.03	0.001	0.9	0.099
B	K	A0A2K8SQ70	74	0.187	38.425	0.742	0.004	0.138	0.858
E	K	A0A2K8SQ70	82	0.312	64.178	-0.519	0.004	0.085	0.91
E	K	A0A2K8SQ70	96	0.297	61.052	-2.212	0.004	0.197	0.799
B	K	A0A2K8SQ70	122	0.18	36.944	0.172	0.004	0.138	0.858
B	K	A0A2K8SQ70	170	0.217	44.74	0.349	0.004	0.197	0.799
E	K	A0A2K8SQ70	193	0.394	81.108	-1.857	0.018	0.088	0.893
B	K	A0A2K8SQ70	231	0.071	14.522	0.078	0.001	0.959	0.04
B	K	A0A2K8SQ70	255	0.085	17.423	-0.275	0.001	0.9	0.099
B	K	A0A2K8SQ70	264	0.208	42.703	0.499	0.004	0.138	0.858
B	K	A0A2K8SQ70	312	0.226	46.509	0.92	0.004	0.085	0.91
E	K	A0A2K8SQ70	345	0.383	78.783	-1.94	0.018	0.141	0.84
E	K	A0A2K8SQH8	7	0.452	92.874	0.611	0.938	0.007	0.055
B	K	A0A2K8SQH8	9	0.192	39.433	0.164	0.923	0.002	0.076
E	K	A0A2K8SQH8	64	0.462	95.116	0.812	0.353	0.048	0.598
E	K	A0A2K8SQH8	73	0.509	104.619	-0.601	0.056	0.142	0.802
E	K	A0A2K8SQH8	81	0.481	98.962	0.219	0.056	0.142	0.802
E	K	A0A2K8SQH8	161	0.586	120.602	-0.392	0.113	0.043	0.844
B	K	A0A2K8SQH8	180	0.208	42.847	-1.329	0.056	0.142	0.802
E	K	A0A2K8SQH8	184	0.51	104.907	-1.449	0.053	0.043	0.903
B	K	A0A2K8SQH8	202	0.194	39.968	-0.124	0.022	0.552	0.426
E	K	A0A2K8SQH8	215	0.521	107.149	-0.518	0.058	0.017	0.925
E	K	A0A2K8SQH8	216	0.374	76.85	0.453	0.113	0.087	0.8
E	K	A0A2K8SQH8	218	0.318	65.31	0.547	0.66	0.049	0.291
E	K	A0A2K8SQH8	225	0.435	89.418	1.221	0.923	0.002	0.076
E	K	A0A2K8SQH8	227	0.381	78.269	0.536	0.406	0.004	0.591
B	K	A0A2K8SQH8	229	0.215	44.328	0.506	0.005	0.015	0.979
E	K	A0A2K8SQH8	256	0.295	60.62	-0.665	0.257	0.016	0.727
E	K	A0A2K8SQH8	265	0.298	61.401	-0.937	0.6	0.003	0.397
E	K	A0A2K8SQH8	280	0.399	82.115	-0.228	0.053	0.043	0.903
B	K	A0A2K8SQH8	291	0.282	57.966	0.321	0.021	0.452	0.528
E	K	A0A2K8SQH8	307	0.356	73.332	-1.392	0.278	0.093	0.628
E	K	A0A2K8SQH8	320	0.517	106.367	-0.164	0.43	0.016	0.555
E	K	A0A2K8SQH8	341	0.386	79.421	0.147	0.622	0.015	0.363
E	K	A0A2K8SQH8	345	0.426	87.587	0.94	0.97	0.001	0.029
E	K	A0A2K8SQH8	349	0.393	80.799	0.714	0.859	0.002	0.139
E	K	A0A2K8SQH8	354	0.581	119.573	-1.447	0.058	0.017	0.925
E	K	A0A2K8SQH8	377	0.471	96.844	-0.398	0.339	0.016	0.645
E	K	A0A2K8SQH8	396	0.561	115.398	-0.915	0.191	0.086	0.723
E	K	A0A2K8SQH8	452	0.456	93.779	-0.29	0.455	0.046	0.498
E	K	A0A2K8SQH8	465	0.416	85.53	1.288	0.97	0.001	0.029
E	K	A0A2K8SQH8	473	0.651	133.993	0.61	0.522	0.016	0.462
E	K	A0A2K8SQH8	475	0.745	153.205	-0.806	0.018	0.019	0.964
E	K	A0A2K8SQH8	508	0.488	100.361	1.218	0.97	0.001	0.029
E	K	A0A2K8SQH8	525	0.288	59.242	0.421	0.004	0.197	0.799
E	K	A0A2K8SQH8	547	0.508	104.496	-1.611	0.113	0.043	0.844
E	K	A0A2K8SQH8	558	0.454	93.367	-0.91	0.199	0.152	0.649
E	K	A0A2K8SQH8	561	0.555	114.246	-0.771	0.199	0.152	0.649
E	K	A0A2K8SQH8	565	0.454	93.306	-1.745	0.191	0.086	0.723
E	K	A0A2K8SQH8	571	0.558	114.863	-1.667	0.118	0.15	0.732
E	K	A0A2K8SQH8	588	0.376	77.24	-1.034	0.021	0.452	0.528
E	K	A0A2K8SQH8	614	0.341	70.123	-1.503	0.066	0.296	0.638
B	K	A0A2K8SQH8	647	0.133	27.44	0.638	0.97	0.001	0.029
E	K	A0A2K8SQI1	4	0.538	110.749	0.928	0.135	0.317	0.548
E	K	A0A2K8SQI1	43	0.546	112.353	-0.017	0.018	0.019	0.964
E	K	A0A2K8SQI1	78	0.5	102.85	1.171	0.802	0.014	0.185
E	K	A0A2K8SQI1	102	0.526	108.239	0.114	0.561	0.047	0.393
E	K	A0A2K8SQI1	114	0.615	126.444	-0.769	0.053	0.043	0.903
E	K	A0A2K8SQI1	117	0.551	113.3	0.6	0.455	0.046	0.498
E	K	A0A2K8SQI1	137	0.557	114.575	-0.271	0.455	0.046	0.498
E	K	A0A2K8SQI1	152	0.444	91.269	0.297	0.268	0.505	0.227
E	K	A0A2K8SQK3	3	0.514	105.75	0.619	0.113	0.087	0.8
E	K	A0A2K8SQK3	26	0.309	63.623	-0.653	0.113	0.087	0.8
E	K	A0A2K8SQK3	75	0.505	103.94	-0.196	0.004	0.138	0.858
B	K	A0A2K8SQK3	127	0.226	46.426	-0.033	0.004	0.514	0.481
E	K	A0A2K8SQK3	131	0.368	75.698	1.269	0.001	0.9	0.099
B	K	A0A2K8SQK3	192	0.039	7.94	0.09	0.004	0.42	0.576
E	K	A0A2K8SQK3	198	0.285	58.604	0.479	0.021	0.452	0.528
E	K	A0A2K8SQK3	213	0.406	83.494	0.36	0.339	0.016	0.645
E	K	A0A2K8SQK3	237	0.674	138.724	1.185	0.97	0.001	0.029
E	K	A0A2K8SQK3	299	0.302	62.163	-1.294	0.064	0.216	0.721
E	K	A0A2K8SQK3	394	0.347	71.481	-0.372	0.052	0.084	0.864
E	K	A0A2K8SQL3	23	0.283	58.316	-0.475	0.538	0.173	0.289
B	K	A0A2K8SQL3	35	0.225	46.282	0.85	0.782	0.003	0.215
E	K	A0A2K8SQL3	111	0.317	65.166	-0.912	0.113	0.043	0.844
B	K	A0A2K8SQL3	189	0.227	46.714	-0.203	0.923	0.002	0.076
E	K	A0A2K8SQL3	283	0.313	64.446	-0.876	0.339	0.016	0.645
B	K	A0A2K8SQL3	289	0.258	53.112	-0.512	0.859	0.002	0.139
B	K	A0A2K8SQL3	337	0.224	46.077	0.947	0.988	0	0.012
E	K	A0A2K8SQL3	349	0.329	67.572	-0.966	0.018	0.088	0.893
B	K	A0A2K8SQL3	417	0.201	41.263	-0.039	0.923	0.002	0.076
B	K	A0A2K8SQL3	429	0.281	57.699	-0.007	0.923	0.002	0.076
E	K	A0A2K8SQL3	448	0.29	59.612	-0.521	0.97	0.001	0.029
B	K	A0A2K8SQL3	464	0.105	21.516	-2.164	0.622	0.015	0.363
E	K	A0A2K8SQL3	499	0.414	85.263	-0.129	0.056	0.142	0.802
E	K	A0A2K8SQL3	540	0.59	121.404	-0.175	0.181	0.017	0.803
E	K	A0A2K8SQL3	565	0.329	67.716	0.842	0.064	0.216	0.721
E	K	A0A2K8SQL3	578	0.89	182.991	0.844	0.003	0.003	0.994
E	K	A0A2K8SQR2	12	0.494	101.678	0.122	0.052	0.084	0.864
E	K	A0A2K8SQR2	13	0.55	113.073	-0.548	0.056	0.142	0.802
E	K	A0A2K8SQR2	41	0.499	102.644	0.297	0.923	0.002	0.076
E	K	A0A2K8SQR2	58	0.352	72.448	1.161	0.97	0.001	0.029
E	K	A0A2K8SQR2	64	0.825	169.785	0.465	0.003	0.003	0.994
E	K	A0A2K8SQR4	8	0.531	109.206	-0.265	0.052	0.084	0.864
E	K	A0A2K8SQR4	9	0.667	137.161	0.29	0.053	0.043	0.903
E	K	A0A2K8SQR4	12	0.487	100.114	-0.894	0.052	0.084	0.864
E	K	A0A2K8SQR4	17	0.263	54.017	-0.219	0.024	0.655	0.322
E	K	A0A2K8SQR4	77	0.326	67.099	0.925	0.018	0.088	0.893
B	K	A0A2K8SQR4	83	0.161	33.056	-0.003	0.052	0.084	0.864
B	K	A0A2K8SQR4	105	0.034	7.035	-0.144	0.004	0.336	0.66
E	K	A0A2K8SQR4	118	0.367	75.471	0.525	0.021	0.756	0.223
B	K	A0A2K8SQR4	151	0.075	15.489	1.365	0.717	0.014	0.269
E	K	A0A2K8SQR4	168	0.424	87.32	-0.45	0.353	0.048	0.598
B	K	A0A2K8SQR4	177	0.126	25.898	-0.154	0.056	0.142	0.802
E	K	A0A2K8SQR9	26	0.554	113.978	0.591	0.053	0.043	0.903
E	K	A0A2K8SQR9	48	0.53	108.939	-0.534	0.018	0.047	0.935
E	K	A0A2K8SQR9	120	0.445	91.454	-0.432	0.018	0.047	0.935
E	K	A0A2K8SQR9	124	0.528	108.568	-0.164	0.056	0.142	0.802
E	K	A0A2K8SQR9	177	0.295	60.661	-0.537	0.321	0.003	0.675
B	K	A0A2K8SQR9	189	0.254	52.166	-0.511	0.339	0.016	0.645
E	K	A0A2K8SQR9	203	0.305	62.697	0.741	0.052	0.084	0.864
E	K	A0A2K8SQR9	217	0.532	109.35	-0.614	0.109	0.005	0.886
E	K	A0A2K8SQR9	254	0.424	87.299	-0.048	0.246	0.004	0.75
E	K	A0A2K8SQR9	256	0.3	61.689	0.325	0.005	0.015	0.979
B	K	A0A2K8SQR9	267	0.243	50.067	0.2	0.859	0.002	0.139
E	K	A0A2K8SQR9	305	0.385	79.153	-0.236	0.191	0.086	0.723
E	K	A0A2K8SQR9	312	0.393	80.922	-0.285	0.018	0.047	0.935
E	K	A0A2K8SQR9	375	0.672	138.169	0.913	0.923	0.002	0.076
B	K	A0A2K8SQR9	378	0.256	52.597	1.27	0.97	0.001	0.029
E	K	A0A2K8SQR9	379	0.545	112.106	1.349	0.97	0.001	0.029
E	K	A0A2K8SQR9	383	0.358	73.599	1.735	0.97	0.001	0.029
B	K	A0A2K8SQR9	385	0.193	39.68	0.998	0.97	0.001	0.029
E	K	A0A2K8SQR9	406	0.585	120.334	0.186	0.782	0.003	0.215
E	K	A0A2K8SQR9	423	0.457	94.005	0.94	0.694	0.003	0.303
E	K	A0A2K8SQR9	454	0.325	66.832	1.132	0.923	0.002	0.076
E	K	A0A2K8SQR9	467	0.435	89.582	1.674	0.923	0.002	0.076
B	K	A0A2K8SQR9	470	0.099	20.385	0.173	0.694	0.003	0.303
E	K	A0A2K8SQR9	481	0.462	95.013	0.161	0.246	0.004	0.75
E	K	A0A2K8SQR9	492	0.405	83.35	2.417	0.97	0.001	0.029
E	K	A0A2K8SQR9	499	0.308	63.458	1.543	0.97	0.001	0.029
E	K	A0A2K8SQR9	500	0.675	138.765	1.625	0.923	0.002	0.076
E	K	A0A2K8SQR9	503	0.543	111.798	1.799	0.782	0.003	0.215
E	K	A0A2K8SQU3	18	0.382	78.516	0.856	0.058	0.017	0.925
E	K	A0A2K8SQU3	27	0.413	84.995	2.214	0.97	0.001	0.029
E	K	A0A2K8SQU3	29	0.287	59.056	1.181	0.97	0.001	0.029
E	K	A0A2K8SQU3	54	0.554	114.061	2.041	0.97	0.001	0.029
E	K	A0A2K8SQU3	59	0.427	87.854	2.149	0.923	0.002	0.076
B	K	A0A2K8SQU3	114	0.27	55.498	1.076	0.988	0	0.012
B	K	A0A2K8SQU3	135	0.254	52.268	0.896	0.97	0.001	0.029
E	K	A0A2K8SQU3	148	0.63	129.591	1.106	0.97	0.001	0.029
E	K	A0A2K8SQV6	9	0.5	102.829	-0.324	0.859	0.002	0.139
B	K	A0A2K8SQV6	12	0.194	39.824	1.078	0.97	0.001	0.029
E	K	A0A2K8SQV6	17	0.381	78.433	2.152	0.97	0.001	0.029
E	K	A0A2K8SQV6	24	0.532	109.391	1.219	0.058	0.017	0.925
E	K	A0A2K8SQV6	49	0.631	129.756	0.348	0.522	0.016	0.462
E	K	A0A2K8SQV6	70	0.522	107.314	1.205	0.97	0.001	0.029
B	K	A0A2K8SQV6	99	0.107	22.03	0.615	0.339	0.016	0.645
B	K	A0A2K8SQV6	103	0.206	42.312	0.333	0.578	0.229	0.194
B	K	A0A2K8SQV6	113	0.159	32.645	0.99	0.975	0.003	0.022
E	K	A0A2K8SQV6	130	0.369	75.944	0.395	0.074	0.484	0.442
E	K	A0A2K8SQV6	158	0.52	107.005	1.956	0.97	0.001	0.029
E	K	A0A2K8SQV6	159	0.777	159.788	1.504	0.923	0.002	0.076
E	K	A0A2K8SQV6	163	0.57	117.187	0.947	0.004	0.197	0.799
E	K	A0A2K8SQV6	171	0.709	145.738	-0.906	0.018	0.047	0.935
E	K	A0A2K8SQV6	172	0.706	145.245	-0.358	0.005	0.015	0.979
E	K	A0A2K8SQV6	200	0.581	119.573	1.415	0.97	0.001	0.029
E	K	A0A2K8SQV6	227	0.786	161.68	-0.274	0.005	0.015	0.979
E	K	A0A2K8SQW3	25	0.417	85.818	0.931	0.66	0.049	0.291
E	K	A0A2K8SQW3	40	0.442	90.919	-1.034	0.257	0.016	0.727
B	K	A0A2K8SQW3	44	0.198	40.626	-0.112	0.018	0.047	0.935
E	K	A0A2K8SQW3	60	0.405	83.391	2.018	0.97	0.001	0.029
E	K	A0A2K8SQW3	67	0.631	129.776	1.585	0.782	0.003	0.215
E	K	A0A2K8SQW3	106	0.409	84.07	0.293	0.004	0.085	0.91
B	K	A0A2K8SQW3	117	0.138	28.345	0.501	0.052	0.084	0.864
E	K	A0A2K8SQW3	123	0.566	116.447	2.033	0.97	0.001	0.029
B	K	A0A2K8SQW3	124	0.197	40.564	1.482	0.97	0.001	0.029
B	K	A0A2K8SQW3	193	0.049	9.997	-0.039	0.717	0.014	0.269
E	K	A0A2K8SQW3	232	0.546	112.333	1.874	0.97	0.001	0.029
B	K	A0A2K8SQW3	245	0.191	39.268	-0.695	0.717	0.014	0.269
B	K	A0A2K8SQW3	246	0.204	42.066	-0.193	0.831	0.044	0.125
E	K	A0A2K8SQW3	295	0.46	94.601	0.616	0.353	0.048	0.598
E	K	A0A2K8SQW3	300	0.375	77.22	-0.628	0.113	0.087	0.8
E	K	A0A2K8SQW3	307	0.513	105.462	0.238	0.502	0.002	0.495
E	K	A0A2K8SQW3	414	0.548	112.765	-0.831	0.717	0.014	0.269
E	K	A0A2K8SQW3	422	0.391	80.346	1.948	0.97	0.001	0.029
B	K	A0A2K8SQW3	424	0.127	26.042	1.43	0.97	0.001	0.029
B	K	A0A2K8SQW3	437	0.244	50.109	0.011	0.018	0.088	0.893
B	K	A0A2K8SQW3	439	0.226	46.426	0.665	0.005	0.045	0.951
E	K	A0A2K8SQX2	57	0.51	104.989	1.336	0.923	0.002	0.076
E	K	A0A2K8SQX2	82	0.596	122.577	1.867	0.923	0.002	0.076
E	K	A0A2K8SQX2	85	0.505	103.878	2.038	0.97	0.001	0.029
E	K	A0A2K8SQX2	96	0.587	120.684	1.663	0.97	0.001	0.029
E	K	A0A2K8SQX2	115	0.551	113.382	2.071	0.97	0.001	0.029
B	K	A0A2K8SQX2	117	0.159	32.686	1.266	0.97	0.001	0.029
E	K	A0A2K8SQX2	123	0.51	105.01	2.395	0.97	0.001	0.029
E	K	A0A2K8SQX2	132	0.296	60.805	1.549	0.97	0.001	0.029
B	K	A0A2K8SQX2	161	0.162	33.406	0.924	0.97	0.001	0.029
E	K	A0A2K8SQX2	167	0.559	115.007	1.782	0.782	0.003	0.215
E	K	A0A2K8SR02	6	0.515	105.853	1.392	0.975	0.003	0.022
E	K	A0A2K8SR02	27	0.268	55.128	1.284	0.97	0.001	0.029
E	K	A0A2K8SR02	52	0.544	111.819	2.066	0.97	0.001	0.029
E	K	A0A2K8SR02	61	0.516	106.141	1.208	0.782	0.003	0.215
E	K	A0A2K8SR02	117	0.576	118.524	1.303	0.923	0.002	0.076
B	K	A0A2K8SR02	134	0.242	49.882	0.928	0.97	0.001	0.029
B	K	A0A2K8SR19	6	0.151	31.122	1.283	0.001	0.959	0.04
E	K	A0A2K8SR19	9	0.295	60.64	2.094	0.001	0.959	0.04
E	K	A0A2K8SR19	31	0.77	158.389	0.96	0.694	0.003	0.303
E	K	A0A2K8SR19	35	0.444	91.393	1.4	0.004	0.138	0.858
E	K	A0A2K8SR19	60	0.461	94.807	1.491	0.975	0.003	0.022
E	K	A0A2K8SR19	68	0.42	86.497	2.413	0.001	0.9	0.099
E	K	A0A2K8SR19	89	0.598	123.029	0.69	0.052	0.084	0.864
E	K	A0A2K8SR19	107	0.726	149.4	0.293	0.109	0.005	0.886
E	K	A0A2K8SR31	9	0.436	89.767	0.134	0.622	0.015	0.363
E	K	A0A2K8SR31	16	0.305	62.8	0.572	0.878	0.01	0.111
E	K	A0A2K8SR31	21	0.461	94.766	1.383	0.97	0.001	0.029
E	K	A0A2K8SR31	56	0.589	121.075	1.037	0.43	0.016	0.555
E	K	A0A2K8SR31	75	0.472	97.09	0.945	0.782	0.003	0.215
E	K	A0A2K8SR31	84	0.4	82.177	1.253	0.97	0.001	0.029
E	K	A0A2K8SR31	90	0.592	121.733	0.066	0.406	0.004	0.591
E	K	A0A2K8SR31	99	0.413	85.036	0.359	0.923	0.002	0.076
E	K	A0A2K8SR31	107	0.523	107.561	0.983	0.717	0.014	0.269
E	K	A0A2K8SR31	119	0.407	83.679	0.77	0.802	0.014	0.185
E	K	A0A2K8SR31	123	0.364	74.937	1.03	0.717	0.014	0.269
E	K	A0A2K8SR31	150	0.471	96.802	1.447	0.878	0.01	0.111
E	K	A0A2K8SR31	195	0.469	96.432	-1.427	0.018	0.019	0.964
E	K	A0A2K8SR31	210	0.43	88.43	2.567	0.97	0.001	0.029
E	K	A0A2K8SR31	226	0.504	103.632	1.565	0.923	0.002	0.076
E	K	A0A2K8SR31	236	0.469	96.556	1.149	0.97	0.001	0.029
E	K	A0A2K8SR31	273	0.344	70.843	1.703	0.97	0.001	0.029
E	K	A0A2K8SR31	280	0.484	99.621	0.843	0.859	0.002	0.139
E	K	A0A2K8SR31	290	0.272	55.971	1.542	0.97	0.001	0.029
E	K	A0A2K8SR31	294	0.464	95.527	2.29	0.97	0.001	0.029
E	K	A0A2K8SR31	332	0.492	101.122	1.681	0.97	0.001	0.029
E	K	A0A2K8SR31	335	0.346	71.172	0.661	0.923	0.002	0.076
E	K	A0A2K8SR31	341	0.611	125.703	-0.103	0.257	0.016	0.727
E	K	A0A2K8SR47	2	0.603	123.996	0.517	0.43	0.016	0.555
B	K	A0A2K8SR47	43	0.243	49.923	-0.534	0.001	0.9	0.099
E	K	A0A2K8SR47	77	0.503	103.385	0.145	0.021	0.756	0.223
B	K	A0A2K8SR47	154	0.266	54.613	0.723	0.021	0.452	0.528
E	K	A0A2K8SR47	210	0.393	80.758	1.041	0.001	0.959	0.04
E	K	A0A2K8SR82	9	0.273	56.156	0.771	0.6	0.003	0.397
B	K	A0A2K8SR82	13	0.249	51.24	0.611	0.016	0.005	0.979
E	K	A0A2K8SR82	35	0.574	118.01	1.754	0.97	0.001	0.029
E	K	A0A2K8SR82	44	0.256	52.721	1.496	0.016	0.005	0.979
E	K	A0A2K8SR82	73	0.404	83.185	2.284	0.988	0	0.012
B	K	A0A2K8SR82	81	0.168	34.64	0.435	0.053	0.004	0.942
E	K	A0A2K8SR82	107	0.391	80.367	2.295	0.988	0	0.012
B	K	A0A2K8SR82	115	0.164	33.694	0.615	0.016	0.005	0.979
E	K	A0A2K8SR82	128	0.511	105.174	1.097	0.859	0.002	0.139
E	K	A0A2K8SR82	141	0.407	83.699	2.381	0.988	0	0.012
E	K	A0A2K8SR82	146	0.247	50.87	1.437	0.053	0.004	0.942
B	K	A0A2K8SR82	156	0.068	13.905	1.012	0.97	0.001	0.029
E	K	A0A2K8SR82	175	0.401	82.424	2.38	0.97	0.001	0.029
B	K	A0A2K8SR82	183	0.15	30.896	0.511	0.109	0.005	0.886
E	K	A0A2K8SR82	185	0.481	98.942	1.127	0.97	0.001	0.029
B	K	A0A2K8SR82	186	0.035	7.302	0.038	0.97	0.001	0.029
B	K	A0A2K8SR82	189	0.157	32.233	-0.29	0.97	0.001	0.029
E	K	A0A2K8SR82	196	0.49	100.875	1.542	0.923	0.002	0.076
E	K	A0A2K8SR82	201	0.708	145.697	1.322	0.923	0.002	0.076
E	K	A0A2K8SR82	205	0.598	122.906	2.092	0.923	0.002	0.076
E	K	A0A2K8SRA5	89	0.408	83.843	1.268	0.694	0.003	0.303
E	K	A0A2K8SRA5	107	0.493	101.431	2.103	0.97	0.001	0.029
B	K	A0A2K8SRA5	133	0.147	30.156	1.092	0.988	0	0.012
B	K	A0A2K8SRA5	137	0.206	42.415	1.429	0.97	0.001	0.029
B	K	A0A2K8SRA5	147	0.222	45.686	0.948	0.004	0.085	0.91
E	K	A0A2K8SRA5	172	0.523	107.561	-0.019	0.339	0.016	0.645
E	K	A0A2K8SRA5	175	0.659	135.639	0.313	0.268	0.043	0.689
E	K	A0A2K8SRA5	232	0.52	106.923	2.054	0.97	0.001	0.029
E	K	A0A2K8SRA5	233	0.308	63.376	1.63	0.97	0.001	0.029
B	K	A0A2K8SRA5	259	0.254	52.33	0.407	0.455	0.046	0.498
B	K	A0A2K8SRA5	277	0.179	36.759	-0.086	0.386	0.097	0.517
E	K	A0A2K8SRA5	291	0.321	66.05	1.313	0.938	0.007	0.055
E	K	A0A2K8SRA5	292	0.471	96.844	0.666	0.938	0.007	0.055
E	K	A0A2K8SRA5	344	0.511	105.133	2.259	0.97	0.001	0.029
E	K	A0A2K8SRA5	349	0.624	128.316	1.2	0.502	0.002	0.495
B	K	A0A2K8SRA5	396	0.204	42.066	0.333	0.004	0.085	0.91
E	K	A0A2K8SRC6	7	0.501	102.994	-0.38	0.113	0.043	0.844
E	K	A0A2K8SRC6	42	0.427	87.916	-0.13	0.257	0.016	0.727
E	K	A0A2K8SRC6	51	0.409	84.214	0.757	0.782	0.003	0.215
E	K	A0A2K8SRC6	75	0.306	62.862	-0.035	0.321	0.003	0.675
B	K	A0A2K8SRC6	99	0.187	38.486	-0.322	0.005	0.045	0.951
E	K	A0A2K8SRC6	140	0.488	100.361	-1.964	0.018	0.019	0.964
E	K	A0A2K8SRC6	176	0.574	117.969	0.166	0.018	0.019	0.964
B	K	A0A2K8SRC6	178	0.12	24.622	0.705	0.004	0.138	0.858
B	K	A0A2K8SRC6	231	0.302	62.163	-0.823	0.018	0.088	0.893
E	K	A0A2K8SRC6	254	0.351	72.283	-0.98	0.053	0.043	0.903
E	K	A0A2K8SRC6	275	0.435	89.459	0.157	0.782	0.003	0.215
E	K	A0A2K8SRC6	289	0.536	110.255	0.979	0.97	0.001	0.029
E	K	A0A2K8SRC6	298	0.282	58.028	0.574	0.018	0.047	0.935
B	K	A0A2K8SRC6	305	0.229	47.023	-0.734	0.024	0.655	0.322
E	K	A0A2K8SRC6	308	0.245	50.335	-0.404	0.021	0.452	0.528
E	K	A0A2K8SRC6	318	0.453	93.182	-0.643	0.184	0.043	0.773
E	K	A0A2K8SRC6	325	0.438	90.117	-0.686	0.018	0.019	0.964
E	K	A0A2K8SRC6	364	0.659	135.597	0.116	0.522	0.016	0.462
E	K	A0A2K8SRC6	392	0.416	85.633	-0.446	0.268	0.043	0.689
E	K	A0A2K8SRC6	408	0.572	117.66	0.651	0.406	0.004	0.591
E	K	A0A2K8SRC6	433	0.427	87.752	-0.85	0.191	0.086	0.723
E	K	A0A2K8SRC6	563	0.5	102.788	1.148	0.859	0.002	0.139
E	K	A0A2K8SRC6	565	0.515	106.038	0.466	0.053	0.004	0.942
B	K	A0A2K8SRC6	567	0.159	32.727	0.622	0.005	0.045	0.951
B	K	A0A2K8SRC6	575	0.147	30.238	-0.143	0.004	0.085	0.91
B	K	A0A2K8SRC6	635	0.126	25.939	0.322	0.001	0.9	0.099
B	K	A0A2K8SRC6	668	0.167	34.331	-0.405	0.373	0.401	0.226
E	K	A0A2K8SRC6	699	0.426	87.628	0.245	0.018	0.088	0.893
E	K	A0A2K8SRC6	706	0.353	72.694	0.193	0.018	0.141	0.84
E	K	A0A2K8SRC6	730	0.428	88.019	2.312	0.97	0.001	0.029
E	K	A0A2K8SRI6	3	0.49	100.855	1.272	0.02	0.205	0.775
E	K	A0A2K8SRI6	29	0.339	69.671	0.407	0.176	0.004	0.82
E	K	A0A2K8SRI6	32	0.373	76.829	2.5	0.002	0.816	0.182
E	K	A0A2K8SRI6	67	0.661	136.009	1.839	0.97	0.001	0.029
E	K	A0A2K8SRI6	75	0.702	144.484	1.159	0.694	0.003	0.303
E	K	A0A2K8SRI6	101	0.688	141.46	1.082	0.003	0.003	0.994
E	K	A0A2K8SRI6	116	0.477	98.139	0.005	0.455	0.046	0.498
E	K	A0A2K8SRI6	139	0.318	65.433	1.399	0.004	0.616	0.381
E	K	A0A2K8SRJ5	10	0.314	64.672	0.358	0.988	0	0.012
B	K	A0A2K8SRJ5	11	0.219	44.966	0.316	0.988	0	0.012
E	K	A0A2K8SRJ5	29	0.436	89.623	0.181	0.538	0.173	0.289
B	K	A0A2K8SRJ5	49	0.204	41.983	0.591	0.069	0.386	0.545
E	K	A0A2K8SRJ5	61	0.487	100.279	-0.617	0.053	0.043	0.903
B	K	A0A2K8SRJ5	97	0.247	50.726	0.37	0.064	0.216	0.721
E	K	A0A2K8SRJ5	109	0.485	99.764	0.598	0.191	0.086	0.723
E	K	A0A2K8SRJ5	114	0.399	82.157	-0.013	0.252	0.423	0.325
E	K	A0A2K8SRL8	5	0.578	118.936	0.488	0.018	0.141	0.84
E	K	A0A2K8SRL8	15	0.432	88.78	-0.033	0.268	0.043	0.689
B	K	A0A2K8SRL8	40	0.185	38.034	0.933	0.97	0.001	0.029
B	K	A0A2K8SRL8	42	0.111	22.73	0.447	0.988	0	0.012
E	K	A0A2K8SRL8	51	0.25	51.404	-0.521	0.859	0.002	0.139
B	K	A0A2K8SRL8	67	0.098	20.097	0.198	0.923	0.002	0.076
E	K	A0A2K8SRL8	98	0.417	85.695	0.806	0.97	0.001	0.029
E	K	A0A2K8SRL8	111	0.361	74.319	0.148	0.97	0.001	0.029
E	K	A0A2K8SRL8	119	0.571	117.475	0.247	0.339	0.016	0.645
E	K	A0A2K8SRL8	120	0.643	132.306	-0.306	0.257	0.016	0.727
E	K	A0A2K8SRL8	165	0.386	79.297	0.247	0.199	0.152	0.649
E	K	A0A2K8SRL8	186	0.459	94.355	-0.056	0.113	0.087	0.8
E	K	A0A2K8SRL8	235	0.53	109.083	0.244	0.125	0.227	0.648
E	K	A0A2K8SRL8	259	0.412	84.748	-0.617	0.307	0.165	0.527
E	K	A0A2K8SRL8	275	0.531	109.144	0.002	0.878	0.01	0.111
E	K	A0A2K8SRL8	276	0.317	65.166	0.056	0.802	0.014	0.185
E	K	A0A2K8SRL8	279	0.527	108.466	-0.77	0.66	0.049	0.291
E	K	A0A2K8SRL8	312	0.449	92.256	0.459	0.116	0.016	0.868
E	K	A0A2K8SRL8	357	0.485	99.826	-0.061	0.022	0.359	0.619
E	K	A0A2K8SRL8	363	0.312	64.137	0.308	0.011	0.918	0.071
E	K	A0A2K8SRL8	367	0.457	94.067	-0.837	0.021	0.452	0.528
E	K	A0A2K8SRL8	369	0.609	125.271	-0.39	0.004	0.336	0.66
E	K	A0A2K8SRL8	396	0.453	93.141	0.172	0.024	0.655	0.322
E	K	A0A2K8SRL8	422	0.398	81.889	1.655	0.018	0.846	0.136
E	K	A0A2K8SRL8	424	0.427	87.896	1.505	0.018	0.846	0.136
E	K	A0A2K8SRL8	445	0.463	95.239	0.176	0.321	0.252	0.427
E	K	A0A2K8SRL8	448	0.366	75.204	1.109	0.273	0.587	0.14
E	K	A0A2K8SRL8	468	0.517	106.326	-0.809	0.066	0.296	0.638
E	K	A0A2K8SRL8	504	0.466	95.774	-0.373	0.066	0.296	0.638
E	K	A0A2K8SRL8	519	0.579	119.141	-0.146	0.021	0.279	0.699
E	K	A0A2K8SRL8	537	0.308	63.273	-0.21	0.191	0.086	0.723
E	K	A0A2K8SRL8	586	0.385	79.236	1.273	0.002	0.816	0.182
E	K	A0A2K8SRL8	610	0.437	89.911	0.768	0.024	0.655	0.322
E	K	A0A2K8SRL8	618	0.554	114.02	0.491	0.021	0.756	0.223
E	K	A0A2K8SRL8	619	0.354	72.9	0.285	0.021	0.756	0.223
E	K	A0A2K8SRL8	621	0.478	98.386	0.372	0.022	0.552	0.426
E	K	A0A2K8SRL8	623	0.549	112.97	-0.347	0.02	0.205	0.775
E	K	A0A2K8SRL8	646	0.518	106.511	-0.121	0.02	0.205	0.775
E	K	A0A2K8SRL8	667	0.601	123.646	-0.374	0.118	0.15	0.732
E	K	A0A2K8SRL8	682	0.355	72.982	0.511	0.079	0.592	0.329
B	K	A0A2K8SRL8	692	0.227	46.612	0.592	0.004	0.514	0.481
E	K	A0A2K8SRL8	782	0.461	94.787	0.285	0.018	0.141	0.84
E	K	A0A2K8SRL8	788	0.461	94.725	-0.083	0.021	0.279	0.699
E	K	A0A2K8SRL8	884	0.497	102.315	0.37	0.021	0.452	0.528
E	K	A0A2K8SRL8	894	0.482	99.147	-0.811	0.004	0.42	0.576
E	K	A0A2K8SRL8	920	0.465	95.63	0.494	0.022	0.552	0.426
E	K	A0A2K8SRL8	922	0.479	98.551	0.797	0.024	0.655	0.322
E	K	A0A2K8SRL8	949	0.423	86.97	0.36	0.001	0.9	0.099
E	K	A0A2K8SRL8	964	0.509	104.722	-0.647	0.069	0.386	0.545
E	K	A0A2K8SRL8	1007	0.566	116.447	-0.585	0.053	0.043	0.903
E	K	A0A2K8SRL8	1026	0.433	89.089	0.668	0.118	0.15	0.732
E	K	A0A2K8SRL8	1028	0.537	110.523	-0.165	0.058	0.017	0.925
E	K	A0A2K8SRL8	1041	0.355	73.085	0.685	0.001	0.959	0.04
E	K	A0A2K8SRL8	1055	0.24	49.347	1.038	0.001	0.959	0.04
E	K	A0A2K8SRL8	1121	0.306	63.006	0.725	0.97	0.001	0.029
E	K	A0A2K8SRL8	1144	0.295	60.64	0.676	0.802	0.014	0.185
E	K	A0A2K8SRL8	1156	0.279	57.349	1.207	0.148	0.418	0.435
B	K	A0A2K8SRL8	1204	0.288	59.159	-0.477	0.135	0.317	0.548
E	K	A0A2K8SRL8	1233	0.582	119.779	0.315	0.018	0.047	0.935
E	K	A0A2K8SRL8	1241	0.31	63.829	0.043	0.066	0.296	0.638
E	K	A0A2K8SRM6	11	0.417	85.777	1.983	0.97	0.001	0.029
B	K	A0A2K8SRM6	13	0.267	54.901	1.075	0.878	0.01	0.111
E	K	A0A2K8SRM6	26	0.68	139.835	0.353	0.021	0.452	0.528
E	K	A0A2K8SRM6	30	0.52	106.985	-0.88	0.053	0.043	0.903
E	K	A0A2K8SRM6	70	0.328	67.49	1.048	0.002	0.816	0.182
B	K	A0A2K8SRM6	99	0.15	30.958	-0.212	0.66	0.049	0.291
E	K	A0A2K8SRM6	131	0.504	103.714	-0.399	0.113	0.043	0.844
E	K	A0A2K8SRM6	139	0.571	117.537	0.056	0.43	0.016	0.555
E	K	A0A2K8SRM6	147	0.428	87.978	0.466	0.353	0.048	0.598
E	K	A0A2K8SRM6	186	0.575	118.277	0.941	0.113	0.043	0.844
B	K	A0A2K8SRM6	188	0.162	33.303	-0.12	0.66	0.049	0.291
E	K	A0A2K8SRM6	193	0.48	98.654	1.417	0.878	0.01	0.111
E	K	A0A2K8SRM6	217	0.586	120.561	1.361	0.97	0.001	0.029
E	K	A0A2K8SRM6	224	0.604	124.263	0.541	0.859	0.002	0.139
E	K	A0A2K8SRM6	233	0.862	177.334	0.516	0.003	0.003	0.994
E	K	A0A2K8SRQ0	2	0.671	138.045	0.82	0.116	0.016	0.868
E	K	A0A2K8SRQ0	7	0.504	103.632	1.109	0.561	0.047	0.393
E	K	A0A2K8SRQ0	12	0.669	137.593	1.244	0.717	0.014	0.269
E	K	A0A2K8SRQ0	13	0.439	90.323	0.915	0.622	0.015	0.363
E	K	A0A2K8SRQ0	15	0.451	92.791	1.122	0.701	0.107	0.192
E	K	A0A2K8SRQ0	23	0.603	123.975	1.594	0.878	0.01	0.111
E	K	A0A2K8SRQ0	33	0.466	95.918	1.306	0.923	0.002	0.076
E	K	A0A2K8SRQ0	38	0.447	92.03	0.943	0.622	0.015	0.363
E	K	A0A2K8SRQ0	39	0.62	127.452	0.579	0.43	0.016	0.555
E	K	A0A2K8SRQ0	40	0.6	123.482	0.097	0.257	0.016	0.727
E	K	A0A2K8SRQ0	41	0.526	108.157	-0.007	0.116	0.016	0.868
E	K	A0A2K8SRQ0	47	0.521	107.17	0.666	0.053	0.043	0.903
E	K	A0A2K8SRQ0	60	0.558	114.822	0.46	0.502	0.002	0.495
E	K	A0A2K8SRR1	3	0.592	121.816	0.518	0.502	0.002	0.495
E	K	A0A2K8SRR1	7	0.364	74.854	1.34	0.878	0.01	0.111
E	K	A0A2K8SRR1	24	0.592	121.692	0.158	0.052	0.084	0.864
E	K	A0A2K8SRR1	29	0.64	131.669	0.507	0.021	0.452	0.528
E	K	A0A2K8SRR1	39	0.402	82.609	0.034	0.056	0.142	0.802
E	K	A0A2K8SRR1	46	0.491	100.916	-0.394	0.066	0.296	0.638
E	K	A0A2K8SRR4	3	0.372	76.52	0.531	0.004	0.514	0.481
B	K	A0A2K8SRR4	14	0.094	19.295	1.054	0.923	0.002	0.076
E	K	A0A2K8SRR4	23	0.601	123.667	0.769	0.6	0.003	0.397
E	K	A0A2K8SRR4	32	0.382	78.619	-0.019	0.022	0.552	0.426
B	K	A0A2K8SRR4	52	0.082	16.765	0.573	0.97	0.001	0.029
E	K	A0A2K8SRR4	58	0.613	126.115	1.683	0.923	0.002	0.076
E	K	A0A2K8SRR4	89	0.535	110.049	0.014	0.184	0.043	0.773
E	K	A0A2K8SRR4	170	0.306	62.944	0.221	0.878	0.01	0.111
E	K	A0A2K8SRR4	178	0.431	88.739	1.569	0.97	0.001	0.029
E	K	A0A2K8SRR4	189	0.689	141.624	1.835	0.923	0.002	0.076
E	K	A0A2K8SRR4	191	0.496	102.068	0.447	0.502	0.002	0.495
E	K	A0A2K8SRR5	12	0.264	54.325	1.025	0.859	0.002	0.139
E	K	A0A2K8SRR5	60	0.461	94.745	0.409	0.125	0.227	0.648
E	K	A0A2K8SRR5	64	0.479	98.51	0.022	0.113	0.043	0.844
E	K	A0A2K8SRR5	115	0.345	70.946	0.411	0.066	0.296	0.638
E	K	A0A2K8SRR5	120	0.281	57.74	0.504	0.004	0.336	0.66
E	K	A0A2K8SRR5	134	0.451	92.75	0.588	0.278	0.093	0.628
E	K	A0A2K8SRR5	162	0.587	120.664	-1.453	0.018	0.047	0.935
E	K	A0A2K8SRR5	165	0.403	82.918	-0.393	0.321	0.003	0.675
E	K	A0A2K8SRR5	167	0.37	76.212	0.591	0.831	0.044	0.125
E	K	A0A2K8SRR5	176	0.288	59.18	0.425	0.802	0.014	0.185
E	K	A0A2K8SRR5	180	0.438	89.994	-0.262	0.43	0.016	0.555
E	K	A0A2K8SRR5	223	0.531	109.165	0.994	0.923	0.002	0.076
E	K	A0A2K8SRR5	224	0.368	75.698	0.996	0.97	0.001	0.029
E	K	A0A2K8SRR5	235	0.473	97.317	0.375	0.878	0.01	0.111
E	K	A0A2K8SRR5	246	0.459	94.457	0.528	0.782	0.003	0.215
E	K	A0A2K8SRR5	263	0.483	99.374	0.385	0.113	0.087	0.8
E	K	A0A2K8SRR5	283	0.507	104.331	-1.545	0.181	0.017	0.803
E	K	A0A2K8SRR5	288	0.473	97.337	-1.115	0.052	0.084	0.864
E	K	A0A2K8SRR5	293	0.513	105.545	-0.791	0.056	0.142	0.802
E	K	A0A2K8SRR5	301	0.439	90.261	0.505	0.522	0.016	0.462
E	K	A0A2K8SRR5	302	0.568	116.858	1.071	0.43	0.016	0.555
E	K	A0A2K8SRR5	324	0.426	87.69	0.627	0.802	0.014	0.185
E	K	A0A2K8SRR5	342	0.357	73.455	0.784	0.938	0.007	0.055
E	K	A0A2K8SRR5	351	0.61	125.539	-0.045	0.339	0.016	0.645
E	K	A0A2K8SRR5	368	0.42	86.353	0.193	0.6	0.003	0.397
E	K	A0A2K8SRR5	397	0.587	120.808	0.592	0.321	0.003	0.675
E	K	A0A2K8SRR5	426	0.649	133.417	0.47	0.257	0.016	0.727
E	K	A0A2K8SRR5	428	0.492	101.225	0.319	0.053	0.043	0.903
E	K	A0A2K8SRR5	430	0.626	128.727	0.07	0.053	0.043	0.903
E	K	A0A2K8SRR5	432	0.606	124.675	-0.13	0.053	0.043	0.903
E	K	A0A2K8SRR5	435	0.605	124.51	-0.091	0.056	0.142	0.802
E	K	A0A2K8SRR5	436	0.477	98.222	0.689	0.052	0.084	0.864
E	K	A0A2K8SRR5	439	0.637	131.072	0.497	0.053	0.043	0.903
E	K	A0A2K8SRT5	46	0.865	177.828	1.039	0.246	0.004	0.75
E	K	A0A2K8SRT5	48	0.574	117.969	1.341	0.005	0.015	0.979
E	K	A0A2K8SRT5	58	0.331	68.025	0.811	0.923	0.002	0.076
E	K	A0A2K8SRT5	65	0.334	68.601	2.098	0.988	0	0.012
B	K	A0A2K8SRT5	92	0.232	47.805	1.224	0.004	0.085	0.91
E	K	A0A2K8SRT5	94	0.237	48.792	1.013	0.859	0.002	0.139
E	K	A0A2K8SRT5	107	0.416	85.592	1.075	0.938	0.007	0.055
E	K	A0A2K8SRT5	140	0.532	109.432	0.869	0.6	0.003	0.397
B	K	A0A2K8SRT5	152	0.101	20.776	-1.003	0.502	0.002	0.495
B	K	A0A2K8SRT5	185	0.243	50.047	0.754	0.001	0.959	0.04
E	K	A0A2K8SRW3	33	0.527	108.445	0.692	0.018	0.047	0.935
B	K	A0A2K8SRW3	68	0.243	50.006	0.484	0.97	0.001	0.029
E	K	A0A2K8SRW3	113	0.625	128.583	0.062	0.246	0.004	0.75
E	K	A0A2K8SRW3	116	0.624	128.419	1.7	0.502	0.002	0.495
E	K	A0A2K8SRW3	144	0.331	68.066	1.369	0.169	0.612	0.219
E	K	A0A2K8SRW3	174	0.484	99.641	1.474	0.938	0.007	0.055
E	K	A0A2K8SRW3	184	0.558	114.781	0.491	0.278	0.093	0.628
E	K	A0A2K8SRW3	244	0.403	82.897	0.395	0.216	0.235	0.548
B	K	A0A2K8SS28	15	0.074	15.16	0.681	0.97	0.001	0.029
E	K	A0A2K8SS28	23	0.283	58.213	1.272	0.321	0.003	0.675
E	K	A0A2K8SS28	29	0.429	88.266	0.741	0.001	0.959	0.04
E	K	A0A2K8SS28	48	0.334	68.642	-0.171	0.004	0.085	0.91
B	K	A0A2K8SS28	54	0.245	50.355	1.606	0.001	0.9	0.099
E	K	A0A2K8SS28	68	0.275	56.506	2.01	0.97	0.001	0.029
E	K	A0A2K8SS28	85	0.354	72.777	0.214	0.97	0.001	0.029
E	K	A0A2K8SS28	86	0.229	47.105	0.236	0.97	0.001	0.029
B	K	A0A2K8SS28	104	0.152	31.184	-1.007	0.923	0.002	0.076
B	K	A0A2K8SS28	107	0.224	46.056	-0.201	0.938	0.007	0.055
E	K	A0A2K8SS28	121	0.491	101.019	-0.231	0.717	0.014	0.269
E	K	A0A2K8SS28	133	0.432	88.945	-0.004	0.859	0.002	0.139
E	K	A0A2K8SS28	159	0.566	116.406	1.554	0.97	0.001	0.029
E	K	A0A2K8SS28	166	0.362	74.422	1.976	0.97	0.001	0.029
E	K	A0A2K8SS28	202	0.383	78.701	0.058	0.6	0.003	0.397
E	K	A0A2K8SS28	218	0.579	119.08	0.326	0.622	0.015	0.363
E	K	A0A2K8SS28	245	0.383	78.742	0.882	0.257	0.016	0.727
E	K	A0A2K8SS43	2	0.388	79.812	1.019	0.022	0.552	0.426
E	K	A0A2K8SS43	3	0.314	64.631	1.803	0.018	0.846	0.136
E	K	A0A2K8SS43	12	0.301	62.019	0.973	0.257	0.016	0.727
E	K	A0A2K8SS43	17	0.278	57.143	2.428	0.97	0.001	0.029
E	K	A0A2K8SS43	40	0.557	114.493	0.518	0.018	0.088	0.893
E	K	A0A2K8SS43	58	0.266	54.634	0.948	0.021	0.452	0.528
B	K	A0A2K8SS43	60	0.213	43.732	1.51	0.006	0.962	0.032
B	K	A0A2K8SS43	76	0.109	22.38	1.887	0.988	0	0.012
B	K	A0A2K8SS43	90	0.163	33.447	1.494	0.002	0.816	0.182
E	K	A0A2K8SS43	107	0.528	108.651	0.614	0.052	0.084	0.864
[truncated: 2,067 more rows]

## Sheet: Table S5
Table S5: GO enrichment analysis of Kmal proteins in N. flagelliforme.
GO Terms Level 1	GO_ID	Term	Test	Ref	TestAll	RefAll	Test_per	Ref_per	TestSeqs	RefSeqs	P value	-log10(p value)	FDR	richFactor
Biological Process	GO:0009987	cellular process	21	72	44	236	0.477273	0.305085	A0A2K8SM92,A0A2K8SLQ3,A0A2K8SSS1,A0A2K8SUD5,A0A2K8SW68,A0A2K8T2E7,A0A2K8SQ07,A0A2K8SS97,A0A2K8SY35,A0A2K8SQV6,A0A2K8SRR4,A0A2K8SX07,A0A2K8SQU3,A0A2K8SR02,A0A2K8STF2,D4NZI3,A0A2K8SQR9,A0A2K8SYJ0,A0A2K8SJU5,A0A2K8SGX5,A0A2K8SIM9	A0A2K8SVH2,A0A2K8SM92,A0A2K8SXG1,A0A2K8SLQ3,A0A2K8SLS5,A0A2K8SHB5,A0A2K8T2U2,A0A2K8SSS1,A0A2K8SP02,A0A2K8T034,A0A2K8SM45,A0A1L5SMA2,A0A2K8SQL3,A0A2K8SLN7,A0A2K8SNU4,A0A2K8SST9,A0A2K8SUD5,A0A2K8SW68,A0A2K8SG09,A0A2K8T2E7,A0A2K8SQ07,A0A2K8SLC8,A0A2K8SJ12,A0A2K8SRL8,A0A2K8SJC1,E7DPI5,A0A2K8SZC9,A0A2K8T7S0,A0A2K8SYR6,A0A2K8SS98,A0A2K8SS97,A0A2K8SRA5,A0A2K8SHN4,A0A2K8SY00,A0A2K8SNB8,A0A2K8SY35,A0A2K8S…	0.00602684	2.21991	0.24704	0.291667
	GO:0015979	photosynthesis	8	16	44	236	0.181818	0.0677966	A0A2K8SSS1,A0A2K8SX07,A0A2K8SGX5,A0A2K8SIM9,A0A2K8SQU3,A0A2K8SR02,A0A2K8STF2,D4NZI3	A0A2K8SZD5,A0A2K8SSS1,A0A2K8SX07,A0A2K8SGX5,A0A2K8SIM9,A0A2K8SSC2,A0A2K8SJL1,A0A2K8SK65,A0A2K8SLB0,A0A2K8SLI3,A0A2K8SQU3,A0A2K8SR02,A0A2K8SSZ3,A0A2K8ST67,A0A2K8STF2,D4NZI3	0.00318888	2.49636	0.215781	0.5
	GO:0019538	protein metabolic process	6	12	44	236	0.136364	0.0508475	A0A2K8SS97,A0A2K8SJU5,A0A2K8SQU3,A0A2K8SR02,A0A2K8STF2,D4NZI3	A0A2K8SYR6,A0A2K8SS98,A0A2K8SS97,A0A2K8SJU5,A0A2K8SLB0,A0A2K8SQU3,A0A2K8SR02,A0A2K8ST67,A0A2K8STF2,A0A2K8T090,A0A2K8T8P6,D4NZI3	0.0115909	1.93588	0.24704	0.5
	GO:0044267	cellular protein metabolic process	6	12	44	236	0.136364	0.0508475	A0A2K8SS97,A0A2K8SJU5,A0A2K8SQU3,A0A2K8SR02,A0A2K8STF2,D4NZI3	A0A2K8SYR6,A0A2K8SS98,A0A2K8SS97,A0A2K8SJU5,A0A2K8SLB0,A0A2K8SQU3,A0A2K8SR02,A0A2K8ST67,A0A2K8STF2,A0A2K8T090,A0A2K8T8P6,D4NZI3	0.0115909	1.93588	0.24704	0.5
	GO:0018298	protein-chromophore linkage	5	9	44	236	0.113636	0.0381356	A0A2K8SJU5,A0A2K8SQU3,A0A2K8SR02,A0A2K8STF2,D4NZI3	A0A2K8SJU5,A0A2K8SLB0,A0A2K8SQU3,A0A2K8SR02,A0A2K8ST67,A0A2K8STF2,A0A2K8T090,A0A2K8T8P6,D4NZI3	0.0127779	1.89354	0.24704	0.555556
	GO:0019684	photosynthesis, light reaction	3	4	42	236	0.0714286	0.0169492	A0A2K8SZD5,A0A2K8SGX5,A0A2K8SIM9	A0A2K8SZD5,A0A2K8SGX5,A0A2K8SIM9,A0A2K8SSC2	0.0185652	1.7313	0.472837	0.75
	GO:0008152	metabolic process	19	73	42	236	0.452381	0.309322	A0A2K8SR02,D4NZI3,A0A2K8SP12,A0A2K8SQ07,A0A2K8SJ12,A0A2K8T7S0,A0A2K8SS97,A0A2K8SGU2,A0A2K8SNU4,A0A2K8SQV6,A0A2K8SRR4,A0A2K8SVM1,A0A2K8SZD5,A0A2K8STF2,A0A2K8SQR9,A0A2K8SJU5,A0A2K8SGX5,A0A2K8SIM9,A0A2K8SVS4	A0A2K8SVH2,A0A2K8SJN2,A0A2K8SRC6,A0A2K8T9M3,A0A2K8SG38,A0A2K8SXI3,A0A2K8SSS1,A0A2K8T8Q6,A0A2K8SP02,A0A2K8T034,A0A2K8SM45,A0A1L5SMA2,A0A2K8SLB0,A0A2K8SQU3,A0A2K8SR02,D4NZI3,A0A2K8SP12,A0A2K8SQL3,A0A2K8SG09,A0A2K8T2E7,A0A2K8SQ07,A0A2K8SLC8,A0A2K8SJ12,A0A2K8SRL8,A0A2K8SJC1,E7DPI5,A0A2K8SZC9,A0A2K8T7S0,A0A2K8SYR6,A0A2K8SS98,A0A2K8SS97,A0A2K8SRA5,A0A2K8SHN4,A0A2K8SGU2,A0A2K8SNU4,A0A2K8SY00,A0A2K8SGI3,…	0.023115	1.63611	0.472837	0.260274
	GO:0044260	cellular macromolecule metabolic process	8	22	42	236	0.190476	0.0932203	A0A2K8SJ12,A0A2K8T7S0,A0A2K8SS97,A0A2K8SJU5,A0A2K8SR02,A0A2K8STF2,D4NZI3,A0A2K8SVS4	A0A2K8SVH2,A0A2K8SLC8,A0A2K8SJ12,A0A2K8SRL8,A0A2K8SJC1,E7DPI5,A0A2K8SZC9,A0A2K8T7S0,A0A2K8SYR6,A0A2K8SS98,A0A2K8SS97,A0A2K8SJU5,A0A2K8SLB0,A0A2K8SQU3,A0A2K8SR02,A0A2K8ST67,A0A2K8STF2,A0A2K8T090,A0A2K8T8P6,D4NZI3,A0A2K8SU64,A0A2K8SVS4	0.0237853	1.62369	0.472837	0.363636
	GO:0055114	oxidation-reduction process	4	8	42	236	0.0952381	0.0338983	A0A2K8SZD5,A0A2K8SR02,D4NZI3,A0A2K8SP12	A0A2K8SM45,A0A2K8SQL3,A0A2K8SZD5,A0A2K8SLB0,A0A2K8SQU3,A0A2K8SR02,D4NZI3,A0A2K8SP12	0.0355546	1.4491	0.472837	0.5
Molecular Function	GO:0016491	oxidoreductase activity	25	36	118	236	0.211864	0.152542	A0A2K8SSF3,A0A2K8ST67,A0A2K8STF2,A0A2K8SZD5,A0A2K8SP12,A0A2K8SQL3,A0A2K8SM45,A0A2K8SFV9,A0A1L5SMA2,A0A2K8SHN4,A5YN46,A0A2K8SSC2,A0A2K8SGX5,A0A2K8SG38,A0A2K8SLN7,A0A2K8SNB8,A0A2K8SY35,A0A2K8SUN2,A0A2K8T313,A0A2K8SUD5,A0A2K8SK33,A0A2K8SQW3,A0A2K8SUY3,A0A2K8SW68,A0A2K8T760	A0A2K8SSF3,A0A2K8SST9,A0A2K8ST67,A0A2K8STF2,A0A2K8SZD5,A0A2K8SP12,A0A2K8SQL3,A0A2K8SM45,A0A2K8SFV9,A0A2K8SVG6,A0A2K8SIL8,A0A2K8SX07,A0A1L5SMA2,A0A2K8SHN4,A5YN46,A0A2K8SSC2,A0A2K8SGX5,A0A2K8SIM9,A0A2K8SNU4,A0A2K8SG38,A0A2K8SXI3,A0A2K8SLN7,A0A2K8SNB8,A0A2K8SY35,A0A2K8SJ77,A0A2K8SUN2,A0A2K8T313,A0A2K8SUD5,A0A2K8SGI3,A0A2K8SK33,A0A2K8SQW3,A0A2K8SUY3,A0A2K8SW68,A0A2K8SWP7,A0A2K8T0U7,A0A2K8T760	0.00884108	2.05349	0.693506	0.694444
	GO:0016209	antioxidant activity	5	5	118	236	0.0423729	0.0211864	A0A2K8SP12,A0A2K8SSF3,A5YN46,A0A2K8SUD5,A0A2K8SW68	A0A2K8SP12,A0A2K8SSF3,A5YN46,A0A2K8SUD5,A0A2K8SW68	0.0299288	1.52391	0.693506	1
	GO:0048037	cofactor binding	14	20	118	236	0.118644	0.0847458	A0A2K8ST67,A0A2K8STF2,A0A2K8SQL3,A0A2K8SSF3,A0A2K8SLC8,A0A2K8SRA5,A0A2K8SSC2,A0A2K8SLN7,A0A1L5SMA2,A0A2K8SG38,A0A2K8SHN4,A0A2K8SM45,A0A2K8SZD5,A0A2K8SQW3	A0A2K8SK99,A0A2K8ST67,A0A2K8STF2,A0A2K8SQL3,A0A2K8SSF3,A0A2K8SLC8,A0A2K8SRA5,A0A2K8SKT7,A0A2K8SSC2,A0A2K8SLN7,A0A1L5SMA2,A0A2K8SG38,A0A2K8SVG6,A0A2K8SXI3,A0A2K8SHN4,A0A2K8SM45,A0A2K8T3I4,A0A2K8SST9,A0A2K8SZD5,A0A2K8SQW3	0.0499113	1.3018	0.693506	0.7
	GO:0017076	purine nucleotide binding	8	19	44	236	0.181818	0.0805085	A0A2K8SLQ3,A0A2K8SLV2,A0A2K8SM92,A0A2K8SQR9,A0A2K8SS97,A0A2K8SYJ0,A0A2K8T2E7,A0A2K8ST95	A0A2K8SI26,A0A2K8SJ95,A0A2K8SK76,A0A2K8SLQ3,A0A2K8SLS5,A0A2K8SLV2,A0A2K8SM92,A0A2K8SQR9,A0A2K8SS97,A0A2K8SS98,A0A2K8SSM5,A0A2K8SUJ8,A0A2K8SXG1,A0A2K8SYJ0,A0A2K8T034,A0A2K8T2E7,A0A2K8T8N2,A0A2K8TAG4,A0A2K8ST95	0.0118179	1.92746	0.24704	0.421053
	GO:0032555	purine ribonucleotide binding	8	19	44	236	0.181818	0.0805085	A0A2K8SLQ3,A0A2K8SLV2,A0A2K8SM92,A0A2K8SQR9,A0A2K8SS97,A0A2K8SYJ0,A0A2K8T2E7,A0A2K8ST95	A0A2K8SI26,A0A2K8SJ95,A0A2K8SK76,A0A2K8SLQ3,A0A2K8SLS5,A0A2K8SLV2,A0A2K8SM92,A0A2K8SQR9,A0A2K8SS97,A0A2K8SS98,A0A2K8SSM5,A0A2K8SUJ8,A0A2K8SXG1,A0A2K8SYJ0,A0A2K8T034,A0A2K8T2E7,A0A2K8T8N2,A0A2K8TAG4,A0A2K8ST95	0.0118179	1.92746	0.24704	0.421053
	GO:0035639	purine ribonucleoside triphosphate binding	8	19	44	236	0.181818	0.0805085	A0A2K8SLQ3,A0A2K8SLV2,A0A2K8SM92,A0A2K8SQR9,A0A2K8SS97,A0A2K8SYJ0,A0A2K8T2E7,A0A2K8ST95	A0A2K8SI26,A0A2K8SJ95,A0A2K8SK76,A0A2K8SLQ3,A0A2K8SLS5,A0A2K8SLV2,A0A2K8SM92,A0A2K8SQR9,A0A2K8SS97,A0A2K8SS98,A0A2K8SSM5,A0A2K8SUJ8,A0A2K8SXG1,A0A2K8SYJ0,A0A2K8T034,A0A2K8T2E7,A0A2K8T8N2,A0A2K8TAG4,A0A2K8ST95	0.0118179	1.92746	0.24704	0.421053
	GO:0032553	ribonucleotide binding	8	20	44	236	0.181818	0.0847458	A0A2K8SLQ3,A0A2K8SLV2,A0A2K8SM92,A0A2K8SQR9,A0A2K8SS97,A0A2K8SYJ0,A0A2K8T2E7,A0A2K8ST95	A0A2K8SI26,A0A2K8SJ95,A0A2K8SK76,A0A2K8SLQ3,A0A2K8SLS5,A0A2K8SLV2,A0A2K8SM92,A0A2K8SQR9,A0A2K8SS97,A0A2K8SS98,A0A2K8SSM5,A0A2K8SUJ8,A0A2K8SXG1,A0A2K8SYJ0,A0A2K8T034,A0A2K8T2E7,A0A2K8T8N2,A0A2K8TAG4,A0A2K8ST95,A0A2K8SK99	0.0168889	1.7724	0.276014	0.4
	GO:0097367	carbohydrate derivative binding	8	20	44	236	0.181818	0.0847458	A0A2K8SLQ3,A0A2K8SLV2,A0A2K8SM92,A0A2K8SQR9,A0A2K8SS97,A0A2K8SYJ0,A0A2K8T2E7,A0A2K8ST95	A0A2K8SI26,A0A2K8SJ95,A0A2K8SK76,A0A2K8SLQ3,A0A2K8SLS5,A0A2K8SLV2,A0A2K8SM92,A0A2K8SQR9,A0A2K8SS97,A0A2K8SS98,A0A2K8SSM5,A0A2K8SUJ8,A0A2K8SXG1,A0A2K8SYJ0,A0A2K8T034,A0A2K8T2E7,A0A2K8T8N2,A0A2K8TAG4,A0A2K8ST95,A0A2K8SK99	0.0168889	1.7724	0.276014	0.4
	GO:0003824	catalytic activity	27	116	42	236	0.642857	0.491525	A0A2K8STF2,A0A2K8SZD5,A0A2K8ST95,A0A2K8SQR9,A0A2K8SQ07,A0A2K8SRR4,A0A2K8SP12,A0A2K8SVS4,A0A2K8SQ70,A0A2K8SQV6,A5YN46,A0A2K8SYZ8,A0A2K8SJ12,A0A2K8SGZ6,A0A2K8SS97,A0A2K8SLV2,A0A2K8SGU2,A0A2K8SGX5,A0A2K8SIM9,A0A2K8SNU4,A0A2K8SY35,A0A2K8SX59,A0A2K8SQH8,A0A2K8SJU5,A0A2K8SRW3,A0A2K8SUD5,A0A2K8SQR4	A0A2K8SSF3,A0A2K8SST9,A0A2K8ST67,A0A2K8STF2,A0A2K8SZD5,A0A2K8ST58,A0A2K8SUJ8,A0A2K8T090,A0A2K8T8P6,A0A2K8TAG4,A0A2K8ST95,A0A2K8SJ95,A0A2K8SNB3,A0A2K8SU64,A0A2K8SRL8,A0A2K8SQR9,A0A2K8SQX2,A0A2K8SSM5,A0A2K8SYJ0,A0A2K8SRA5,A0A2K8SS44,A0A2K8SQ07,A0A2K8SRR4,A0A2K8SP12,A0A2K8SQL3,A0A2K8T1A0,A0A2K8SZF4,A0A2K8SVS4,A0A2K8T0N4,A0A2K8SP02,A0A2K8SZV9,A0A2K8SY00,A0A2K8SM45,A0A2K8SFV9,A0A2K8SVG6,A0A2K8SIL8,A0A…	0.0227635	1.64276	0.472837	0.232759
	GO:0045156	electron transporter	2	2	42	236	0.047619	0.00847458	A0A2K8SGX5,A0A2K8SIM9	A0A2K8SGX5,A0A2K8SIM9	0.0310494	1.50795	0.472837	1
	GO:0009055	electron transfer activity	4	8	42	236	0.0952381	0.0338983	A0A2K8SGX5,A0A2K8SIM9,A0A2K8STF2,A0A2K8SZD5	A0A2K8SQL3,A0A2K8SGX5,A0A2K8SIM9,A0A2K8SSF3,A0A2K8SST9,A0A2K8ST67,A0A2K8STF2,A0A2K8SZD5	0.0355546	1.4491	0.472837	0.5
Cellular Component	GO:0016020	membrane	27	42	118	236	0.228814	0.177966	A0A2K8SLV2,A0A2K8SQL3,A0A2K8SQX2,A0A2K8T0M5,A0A2K8SQR9,A0A2K8SSC2,A0A2K8ST67,A0A2K8STF2,A0A2K8SYJ0,A0A2K8SZD5,A0A2K8SJU5,A0A2K8SLB0,A0A2K8SR02,A0A2K8SGZ6,A0A2K8SIV5,A0A2K8SK78,A0A2K8SLI3,A0A2K8SQI1,A0A2K8ST31,A0A2K8SUW3,A0A2K8T213,A0A2K8T2U2,A0A2K8T4Q3,A0A2K8T8P6,A0A2K8TAG4,A0A2K8SS57,A0A2K8T196	A0A2K8SLV2,A0A2K8SQL3,A0A2K8SQX2,A0A2K8T0M5,A0A2K8SQR9,A0A2K8SSC2,A0A2K8SSM5,A0A2K8SSZ3,A0A2K8ST67,A0A2K8STF2,A0A2K8SYJ0,A0A2K8SZD5,A0A2K8SJL1,A0A2K8SJU5,A0A2K8SLB0,A0A2K8SQU3,A0A2K8SR02,D4NZI3,A0A2K8SGI3,A0A2K8SGZ6,A0A2K8SIV5,A0A2K8SK78,A0A2K8SLI3,A0A2K8SQI1,A0A2K8SS87,A0A2K8ST31,A0A2K8ST74,A0A2K8SUW3,A0A2K8T0Y0,A0A2K8T213,A0A2K8T2U2,A0A2K8T4Q3,A0A2K8T8P6,A0A2K8TAA0,A0A2K8TAG4,E7DPV7,A0A2K8SUV5,…	0.0301573	1.52061	0.693506	0.642857
	GO:0005623	cell	19	45	44	236	0.431818	0.190678	A0A2K8SLV2,A0A2K8SLQ3,A0A2K8SM92,A0A2K8SS97,A0A2K8ST95,A0A2K8T2E7,A0A2K8STF2,A0A2K8SGZ6,A0A2K8SGX5,A0A2K8SIM9,A0A2K8SJU5,A0A2K8SQU3,A0A2K8SR02,D4NZI3,A0A2K8SQR9,A0A2K8SYJ0,A0A2K8SUD5,A0A2K8SW68,A0A2K8SY35	A0A2K8SLV2,A0A2K8SQL3,A0A2K8SQX2,A0A2K8SI26,A0A2K8SS57,A0A2K8SLQ3,A0A2K8SLS5,A0A2K8SM92,A0A2K8SNN8,A0A2K8SRA5,A0A2K8SS66,A0A2K8SS97,A0A2K8SS98,A0A2K8ST95,A0A2K8SY00,A0A2K8T034,A0A2K8T2E7,A0A2K8SNB3,A0A2K8SLI3,A0A2K8ST67,A0A2K8STF2,A0A2K8SZD5,A0A2K8SK65,A0A2K8SSZ3,A0A2K8SGZ6,A0A2K8SYR6,A0A2K8SGX5,A0A2K8SIM9,A0A2K8SJL1,A0A2K8SJU5,A0A2K8SLB0,A0A2K8SQU3,A0A2K8SR02,D4NZI3,A0A2K8SQR9,A0A2K8SSC2,A0A2K8S…	2.98831e-05	4.52457	0.0121326	0.422222
	GO:0005622	intracellular	15	33	44	236	0.340909	0.139831	A0A2K8SLQ3,A0A2K8SM92,A0A2K8SS97,A0A2K8ST95,A0A2K8T2E7,A0A2K8STF2,A0A2K8SGZ6,A0A2K8SGX5,A0A2K8SIM9,A0A2K8SJU5,A0A2K8SQU3,A0A2K8SR02,D4NZI3,A0A2K8SQR9,A0A2K8SYJ0	A0A2K8SLQ3,A0A2K8SLS5,A0A2K8SM92,A0A2K8SNN8,A0A2K8SRA5,A0A2K8SS66,A0A2K8SS97,A0A2K8SS98,A0A2K8ST95,A0A2K8SY00,A0A2K8T034,A0A2K8T2E7,A0A2K8SQX2,A0A2K8SLI3,A0A2K8ST67,A0A2K8STF2,A0A2K8SZD5,A0A2K8SK65,A0A2K8SSZ3,A0A2K8SGZ6,A0A2K8SYR6,A0A2K8SGX5,A0A2K8SIM9,A0A2K8SJL1,A0A2K8SJU5,A0A2K8SLB0,A0A2K8SQU3,A0A2K8SR02,D4NZI3,A0A2K8SQR9,A0A2K8SSC2,A0A2K8SSM5,A0A2K8SYJ0	0.000108719	3.96369	0.0147134	0.454545
	GO:0044424	intracellular part	15	33	44	236	0.340909	0.139831	A0A2K8SLQ3,A0A2K8SM92,A0A2K8SS97,A0A2K8ST95,A0A2K8T2E7,A0A2K8SGZ6,A0A2K8SQR9,A0A2K8SYJ0,A0A2K8SGX5,A0A2K8SIM9,A0A2K8SJU5,A0A2K8SQU3,A0A2K8SR02,D4NZI3,A0A2K8STF2	A0A2K8SLQ3,A0A2K8SLS5,A0A2K8SM92,A0A2K8SNN8,A0A2K8SRA5,A0A2K8SS66,A0A2K8SS97,A0A2K8SS98,A0A2K8ST95,A0A2K8SY00,A0A2K8T034,A0A2K8T2E7,A0A2K8SQX2,A0A2K8SGZ6,A0A2K8SQR9,A0A2K8SSM5,A0A2K8SYJ0,A0A2K8SGX5,A0A2K8SIM9,A0A2K8SJL1,A0A2K8SJU5,A0A2K8SLB0,A0A2K8SQU3,A0A2K8SR02,D4NZI3,A0A2K8SK65,A0A2K8SSZ3,A0A2K8SLI3,A0A2K8ST67,A0A2K8STF2,A0A2K8SZD5,A0A2K8SSC2,A0A2K8SYR6	0.000108719	3.96369	0.0147134	0.454545
	GO:0044464	cell part	16	38	44	236	0.363636	0.161017	A0A2K8SLV2,A0A2K8SLQ3,A0A2K8SM92,A0A2K8SS97,A0A2K8ST95,A0A2K8T2E7,A0A2K8SGZ6,A0A2K8SQR9,A0A2K8SYJ0,A0A2K8SGX5,A0A2K8SIM9,A0A2K8SJU5,A0A2K8SQU3,A0A2K8SR02,D4NZI3,A0A2K8STF2	A0A2K8SLV2,A0A2K8SQL3,A0A2K8SQX2,A0A2K8SNB3,A0A2K8SLQ3,A0A2K8SLS5,A0A2K8SM92,A0A2K8SNN8,A0A2K8SRA5,A0A2K8SS66,A0A2K8SS97,A0A2K8SS98,A0A2K8ST95,A0A2K8SY00,A0A2K8T034,A0A2K8T2E7,A0A2K8SGZ6,A0A2K8SQR9,A0A2K8SSM5,A0A2K8SYJ0,A0A2K8SGX5,A0A2K8SIM9,A0A2K8SJL1,A0A2K8SJU5,A0A2K8SLB0,A0A2K8SQU3,A0A2K8SR02,D4NZI3,A0A2K8SK65,A0A2K8SSZ3,A0A2K8SLI3,A0A2K8ST67,A0A2K8STF2,A0A2K8SZD5,A0A2K8SSC2,A0A2K8SYR6,A0A2K8S…	0.000188026	3.72578	0.0190846	0.421053
	GO:0030076	light-harvesting complex	6	8	44	236	0.136364	0.0338983	A0A2K8SGX5,A0A2K8SIM9,A0A2K8SJU5,A0A2K8SQU3,A0A2K8SR02,D4NZI3	A0A2K8SGX5,A0A2K8SIM9,A0A2K8SJL1,A0A2K8SJU5,A0A2K8SLB0,A0A2K8SQU3,A0A2K8SR02,D4NZI3	0.000647038	3.18907	0.0525395	0.75

## Sheet: Table S6
Table S6: Domain enrichment analysis of Kmal proteins in N. flagelliforme.
Domain_id	Domain_Name	Test	TestAll	Ref	RefAll	Test_per	Ref_per	Test_Seq	Ref_Seq	P value	-log10(p value)	FDR	richFactor
PF00502	Phycobilisome protein	3	44	4	236	0.068182	0.016949	A0A2K8SR02, A0A2K8SQU3, D4NZI3	A0A2K8SR02,A0A2K8SQU3,A0A2K8SLB0,D4NZI3	0.0212602	1.67243	0.223729	0.75
PF00006	ATP synthase alpha/beta family, nucleotide-binding domain	2	44	2	236	0.045455	0.008475	A0A2K8SQR9, A0A2K8SYJ0	A0A2K8SQR9,A0A2K8SYJ0	0.0341147	1.46706	0.223729	1
PF00578	AhpC/TSA family	2	44	2	236	0.045455	0.008475	A0A2K8SUD5, A0A2K8SW68	A0A2K8SUD5,A0A2K8SW68	0.0341147	1.46706	0.223729	1
PF02874	ATP synthase alpha/beta family, beta-barrel domain	2	44	2	236	0.045455	0.008475	A0A2K8SQR9, A0A2K8SYJ0	A0A2K8SQR9,A0A2K8SYJ0	0.0341147	1.46706	0.223729	1
PF05239	PRC-barrel domain	2	42	2	236	0.047619	0.008475	A0A2K8SGX5, A0A2K8SIM9	A0A2K8SIM9,A0A2K8SGX5	0.0310494	1.50795	0.208351	1
PF09557	Domain of unknown function (DUF2382)	2	42	2	236	0.047619	0.008475	A0A2K8SGX5, A0A2K8SIM9	A0A2K8SIM9,A0A2K8SGX5	0.0310494	1.50795	0.208351	1

## Sheet: Table S7
Table S7: KEGG enrichment analysis of Kmal proteins in N. flagelliforme.
Map_ID	Map_Name	Test	TestAll	Ref	RefAll	Test_per	Ref_per	Test_Seq	Ref_Seq	P value	-log10(p value)	FDR	richFactor
nfl00195	Photosynthesis	8	118	11	236	0.067797	0.04661	A0A2K8SLI3 A0A2K8SQR9 A0A2K8SQX2 A0A2K8ST31 A0A2K8ST67 A0A2K8STF2 A0A2K8SYJ0 A0A2K8SZD5	A0A2K8SK65 A0A2K8SLI3 A0A2K8SQR9 A0A2K8SQX2 A0A2K8SSM5 A0A2K8SSZ3 A0A2K8ST31 A0A2K8ST67 A0A2K8STF2 A0A2K8SYJ0 A0A2K8SZD5	0.107725	0.967682	0.833333	0.727273
nfl00710	Carbon fixation in photosynthetic organisms	5	44	11	236	0.113636	0.04661	A0A2K8SQV6 A0A2K8SSS1 A0A2K8SX07 A0A2K8SYZ8 A0A2K8SZV9	A0A2K8SG38 A0A2K8SP02 A0A2K8SQV6 A0A2K8SS66 A0A2K8SSS1 A0A2K8SX07 A0A2K8SX21 A0A2K8SXI3 A0A2K8SYZ8 A0A2K8SZV9 A0A2K8T034	0.0346718	1.46002	0.196473	0.454545
nfl00030	Pentose phosphate pathway	4	44	6	236	0.090909	0.025424	A0A2K8SQV6 A0A2K8SSS1 A0A2K8SYZ8 A0A2K8SZV9	A0A2K8SP02 A0A2K8SQV6 A0A2K8SS66 A0A2K8SSS1 A0A2K8SYZ8 A0A2K8SZV9	0.0120171	1.9202	0.180712	0.666667
nfl00230	Purine metabolism	3	44	4	236	0.068182	0.016949	A0A2K8SQ07 A0A2K8SRR4 A0A2K8T2E7	A0A2K8SQ07 A0A2K8SRR4 A0A2K8T2E7 A0A2K8T526	0.0212602	1.67243	0.180712	0.75
nfl00250	Alanine, aspartate and glutamate metabolism	2	42	2	236	0.047619	0.008475	A0A2K8SQ07 A0A2K8SZ44	A0A2K8SQ07 A0A2K8SZ44	0.0310494	1.50795	0.403642	1
nfl00564	Glycerophospholipid metabolism	1	42	1	236	0.02381	0.004237	A0A2K8SGU2	A0A2K8SGU2	0.177966	0.749663	0.462712	1

## Sheet: Table S8
Table S8: Conservation of lysine malonylated proteins.
N.flagelliforme	Staphylococcus aureus	Zey mays	Triticum aestivum	Escherichia coli	Saccharopolyspora erythraea	Oryza sativa	Synechocystis 6803	Homo sapiens	Mus musculus	Number of ortholog
A0A2K8SVM1							sll0370			1
A0A2K8SZ44									Q8C0M9	1
A0A2K8SLV2				P0AAF6	A4FQ26		sll0575	Q9NRK6	Q9CXJ4	5
E7DPV6	X5E0H3	K7VEA3				Q7XPL4				3
A0A2K8SM92		B6T8U7			A4FPA6			P61604	Q64433	4
A5YN46				P0AGD3	A4F7E0		slr1516	P04179	P09671	5
A0A2K8SGZ6							slr0483			1
A0A2K8SM45		A0A1D6HC33		P08200	A4FP27	Q7F280	slr1289	P50213	Q9D6R2	7
A0A2K8SP12				P31660						1
A0A1L5SMA2		A0A1D6N1Z8		P00350		Q2R480	sll0329	P52209	Q9DCD0	6
A0A2K8SFV9				P05793	A4FMQ5	Q7XKI6	sll1363			4
A0A2K8SG38		Q43247	C7C4X1	P0A9B2		Q7FAH2		P04406	P16858	6
A0A2K8SGU2		P80639								1
A0A2K8SHN4		Q09054	W5IA32	P0A9T0	A4FMQ3	Q9SXP2	sll1908	O43175	Q91Z53	8
A0A2K8SIV5				P76397						1
A0A2K8SK33		A0A1D6N0U0								1
A0A2K8SK78						Q8LMR0				1
A0A2K8SLB0							sll1577			1
A0A2K8SLC8	W8TVK2									1
A0A2K8SLN7	W8URN4	C0PHH5		P06715	A4FLD8		slr1096	P00390	P47791	7
A0A2K8SLQ3		C0P530			A4F749	Q9LWT6	slr2076	P10809	P63038	6
A0A2K8SN83				P0AFG6	A4FLD5	Q2QWU7	sll1841	P10515	P53395	6
A0A2K8SN84				P0A9H7			sll0359			2
A0A2K8SNB8				P0ABT2			slr1894			2
A0A2K8SQ37								Q9H6R4		1
A0A2K8SQV6				P0A7Z0		Q5N725	slr0194			3
A0A2K8SQW3				P33602	A4F672			Q8N465	Q7TNG8	4
A0A2K8SQX2		P48186		P0ABA0			sll1324			3
A0A2K8SR02							slr2067			1
A0A2K8SR19							ssr1600			1
A0A2K8SRA5		B7ZYW4			A4F709	Q10R45	sll0017	P04181		5
A0A2K8SRL8				P0A8T7	A4FPP2		sll1789	O14802		4
A0A2K8SRQ0								Q8IZH2	F8VQ87	2
A0A2K8SRT5				P62707			slr1124	P18669	P70266	4
A0A2K8SS28		A0A1D6L6U6	Q9SP56	P0ACA3		Q5Z627		G3V4T6	Q9WVL0	6
A0A2K8SS44								Q9BY44	Q8BJW6	2
A0A2K8SSC2		P19124		P33599						2
A0A2K8SSS1					A4F893		slr2094	P23443		3
A0A2K8ST67		NP_043025.2					slr1834			2
A0A2K8ST99							sll1029			1
A0A2K8STQ9		C0PHC0								1
A0A2K8SU64				P07014			slr0337			2
A0A2K8SUZ5					A4FPJ3		slr1452			2
A0A2K8SVH2				P0AGE0	A4FR31		slr0925	Q04837		4
A0A2K8SWI8				P0A6B7			sll1559			2
A0A2K8SXJ0	W8TVM8	B4F7V1		P0A715	A4FAK6		sll0934			5
A0A2K8SXM2									Q3UW64	1
A0A2K8SYJ0		P00827	W5HK74	P0ABB4	A4FN27	Q0JKB4	slr1329	P06576	P56480	8
A0A2K8SZC9				P0A9M2				Q06203	P00493	3
A0A2K8SZD5		P11601		P52647			ssl0563	P61221	P61222	5
A0A2K8SZR7		A0A1D6LZ57		P0AG16		Q2QLY5				3
A0A2K8T0M1	W8TRW6									1
A0A2K8T0M5				P0A940		Q84Q83				2
A0A2K8T0N4				P21179			slr1854	Q99497	Q99LX0	4
A0A2K8T1A0								P12956		1
A0A2K8T2F2		A0A1D6LKG8		P0A9H7			sll0487		Q9QXF8	4
A0A2K8T760				P42599			slr1784	P53004	Q9DBB8	4
A0A2K8T7S0	W8TUC3									1
A0A2K8T8P6				P76340	A4FQ02		sll0041			3
A0A2K8TAG4							slr1385	O00767		2
A0A2K8SGX5					A4FPP2					1
A0A2K8SJU5					A4FKU1		slr1963			2
A0A2K8SQ07				P0AB89		Q10MD1	slr1133	P04424	P54822	5
A0A2K8SQR9		A0A1X7YHG9	Q332R4	P0ABB0	A4FN29	P0C522	sll1326	P25705	Q03265	8
A0A2K8SRR4				P52061			slr0402		Q9D892	3
A0A2K8SS97	W8TVM8			P0A8L1	A4F636		slr1703	Q5T5C7	Q8C483	6
A0A2K8STF2		P04967								1
A0A2K8SUD5		B4FM07			A4F9Y1	P0C5C9	slr1198	P32119	P35700	6
A0A2K8SVS4					A4F6L2					1
A0A2K8SW68		B4FS55		P0A862	A4F917	Q69TY4	slr0242	P30048	P20108	7
A0A2K8SX59		B6SR15		P23857						2
A0A2K8SXG1		A0A1D6GK64		P0A6Y8	A4F636	Q2QV45	sll0170	P38646	P38647	7
A0A2K8SY35	W8UB98			P0ABT2			slr1894		Q9JHI5	4
A0A2K8SX07		P00874				P0C512				2
A0A2K8SJ75						B9FK36				1
A0A2K8SZV9				P0AFU4						1
A0A2K8SQU3							slr1986			1
A0A2K8T2E7		B4FK49	W5CPX1			Q5TKF4		Q32Q12	P15532	5
D4NZI3							sll1578			1
A0A2K8SHL1								Q13049		1
A0A2K8SKR6					A4FND0					1
A0A2K8ST95		B6TPG0	Q03033	P0CE47	A4FPM7	Q6H4L2	sll1099	P49411	Q69ZS7	8
A0A2K8SWW8				P39199				Q9H792		2
A0A2K8SYZ8		A0A1D6NVZ7		P27302	A4FBP1		sll1070		P40142	5
A0A2K8T1W7									P54071	1
A0A2K8SNU4		K7TXW7				Q0D840	slr0623	P10599	P09103	5
A0A2K8SQR4					A4FMP8			Q96GK7	Q3TC72	3
A0A2K8TB79								P12270	F6ZDS4	2
